# Supplementary material for: Economic impact of delirium in Australia: a cost of illness study
Source: PubMed Central journal article supplement — BMJ Open. 2019 Sep 17;9(9):e027514. doi: 10.1136/bmjopen-2018-027514 (PMC6756419; doi:10.1136/bmjopen-2018-027514), 2019-09-17
Supplement: bmjopen-2018-027514.draft_revisions.pdf [file bmjopen-2018-027514.draft_revisions.pdf]

# BMJ Open

BMJ Open is committed to open peer review. As part of this commitment we make the peer review history of every article we publish publicly available.

When an article is published we post the peer reviewers' comments and the authors' responses online. We also post the versions of the paper that were used during peer review. These are the versions that the peer review comments apply to.

The versions of the paper that follow are the versions that were submitted during the peer review process. They are not the versions of record or the final published versions. They should not be cited or distributed as the published version of this manuscript.

BMJ Open is an open access journal and the full, final, typeset and author-corrected version of record of the manuscript is available on our site with no access controls, subscription charges or pay-per-view fees (<http://bmjopen.bmj.com>).

If you have any questions on BMJ Open's open peer review process please email [info.bmjopen@bmj.com](mailto:info.bmjopen@bmj.com)

# BMJ Open

## The economic impact of delirium in Australia: a cost of illness study

|                               |                                                                                                                                                                                                                                                                                                                                                                                                                                       |
|-------------------------------|---------------------------------------------------------------------------------------------------------------------------------------------------------------------------------------------------------------------------------------------------------------------------------------------------------------------------------------------------------------------------------------------------------------------------------------|
| Journal:                      | <i>BMJ Open</i>                                                                                                                                                                                                                                                                                                                                                                                                                       |
| Manuscript ID                 | bmjopen-2018-027514                                                                                                                                                                                                                                                                                                                                                                                                                   |
| Article Type:                 | Research                                                                                                                                                                                                                                                                                                                                                                                                                              |
| Date Submitted by the Author: | 29-Oct-2018                                                                                                                                                                                                                                                                                                                                                                                                                           |
| Complete List of Authors:     | Pezzullo, Lynne; Deloitte Access Economics<br>Streatfeild, Jared; Deloitte Access Economics,<br>Hickson, Josiah; Deloitte Access Economics<br>Teodorczuk, Andrew; Griffith University, School of Medicine<br>Agar, Meera ; University of Technology Sydney, Improving Palliative,<br>Aged and Chronic Care through Clinical Research and Translation<br>Caplan, Gideon; Prince of Wales Hospital, Department of Geriatric<br>Medicine |
| Keywords:                     | HEALTH ECONOMICS, Delirium & cognitive disorders < PSYCHIATRY,<br>Dementia < NEUROLOGY                                                                                                                                                                                                                                                                                                                                                |
|                               |                                                                                                                                                                                                                                                                                                                                                                                                                                       |

SCHOLARONE™  
Manuscripts

## The economic impact of delirium in Australia: a cost of illness study

Authors: Lynne Pezzullo<sup>1</sup>, Jared Streatfeild<sup>1</sup>, Josiah Hickson<sup>1</sup>, Andrew Teodorczuk<sup>2</sup>,  
Meera Agar<sup>3</sup>, and Gideon Caplan<sup>4,5</sup>

### Author affiliations:

1. Deloitte Access Economics Pty Ltd, Canberra, Australian Capital Territory, Australia
2. Department of School and Medicine, Griffith University, Gold Coast Campus, Queensland, Australia.
3. Improving Palliative, Aged and Chronic Care Through Clinical Research and Translation, University of Technology Sydney, Ultimo, New South Wales, Australia
4. Department of Geriatric Medicine, Prince of Wales Hospital, Sydney, New South Wales, Australia
5. Prince of Wales Clinical School, University of New South Wales, Sydney, New South Wales, Australia.

### Author emails:

Lynne Pezzullo – [lpezzullo@deloitte.com.au](mailto:lpezzullo@deloitte.com.au), Jared Streatfeild – [jstreatfeild@deloitte.com.au](mailto:jstreatfeild@deloitte.com.au), Josiah Hickson – [jhickson@deloitte.com.au](mailto:jhickson@deloitte.com.au), Andrew Teodorczuk - [a.teodorczuk@griffith.edu.au](mailto:a.teodorczuk@griffith.edu.au), Meera Agar – [meera.agar@uts.edu.au](mailto:meera.agar@uts.edu.au), Gideon Caplan – [g.caplan@unsw.edu.au](mailto:g.caplan@unsw.edu.au)

### Corresponding author:

Jared Streatfeild  
Level 2, 8 Brindabella Circuit, Brindabella Business Park, Canberra Airport, ACT, 2609  
Telephone: +61 2 6263 7000  
Email: [jstreatfeild@deloitte.com.au](mailto:jstreatfeild@deloitte.com.au)

### Word count

Main text: 3060

Tables: 3

Figures: 2

## 1 **ABSTRACT**

2 Objectives: To estimate the economic impact of delirium in the Australian population  
3 in 2016-17, including financial costs, and its burden on health.

4 Design, Setting and Participants: A cost-of-illness study was conducted for the  
5 Australian population in the 2016-17 financial year. The total cost of delirium was  
6 estimated using standard cost-of-illness methodology. The prevalence of delirium in  
7 2016-17 was calculated to inform cost estimations.

8 Main outcome measures: The total and per capita costs were analyzed for three  
9 categories: health systems costs, other financial costs including productivity losses  
10 and informal care, and cost associated with loss of wellbeing (burden of disease).  
11 Costs were expressed in 2016-17 pound sterling (£) and Australian dollars (AUD).

12 Results: There were more than 132,000 occurrences of delirium in 2016-17, and  
13 more than 900 deaths were attributed to delirium in 2016-17. The total costs of  
14 delirium in Australia were estimated to be £4.3 billion (AUD8.8 billion) in 2016-17,  
15 ranging between £2.6 billion (AUD5.3 billion) and £5.9 billion (AUD12.1 billion). The  
16 total costs comprised financial costs of £1.7 billion and the value of healthy life lost  
17 of £2.5 billion.

18 Conclusions: These findings highlight the substantial burden that delirium imposes  
19 on Australian society-both in terms of financial costs associated with health system  
20 expenditure and the increased need for residential aged care due to the functional  
21 and cognitive decline associated with delirium and dementia. To reduce the  
22 substantial wellbeing costs of delirium, further research should seek to better

1  
2  
3 23 understand the potential pathways from an episode of delirium to subsequent  
4  
5  
6 24 mortality and reduced cognitive functioning outcomes.  
7  
8  
9 25

10  
11  
12 26 **Strengths and limitations of this study**  
13  
14

15 27 • This study uses cost of illness methodology to estimate the total annual financial  
16  
17 28 and wellbeing impacts of delirium for the first time in Australia.  
18

19  
20 29 • This study also estimates the costs of dementia that are associated with delirium  
21  
22 30 in Australia, with significant implications for other high income western  
23  
24 31 countries.  
25

26  
27 32 • This study is based on non-systematic search strategy to find relevant cost  
28  
29 33 inputs, noting that a number of inputs are sourced from official Australian  
30  
31 34 Government statistics.  
32  
33

34  
35 35 • There were a number of data gaps when estimating costs, meaning the results of  
36  
37 36 our study are only indicative of the total cost.  
38

39  
40 37 • Cost of illness studies provide guidance on the size of the problem, but more  
41  
42 38 work is need to identify cost effective interventions to reduce the burden of  
43  
44 39 delirium.  
45  
46  
47  
48  
49  
50  
51  
52  
53  
54  
55  
56  
57  
58  
59  
60

## 40 INTRODUCTION

41 Delirium is a common, serious, and often-fatal medical condition, characterized by  
42 an acute decline in cognitive functioning.[1] The term delirium is used to describe a  
43 transient, reversible neuropsychiatric syndrome that is of acute (abrupt or sudden)  
44 onset, with a fluctuating course which occurs in the setting of a medical condition.

45 Acute confusion or impaired cognition are other terms that are commonly used to  
46 refer to delirium.[2]

47 The development of delirium has been associated with increased morbidity,  
48 persistent functional decline, increased nursing time per patient, higher hospital  
49 costs, higher rates of residential aged care placement and increased mortality.[2-4] It  
50 is also a significant risk factor for later onset of dementia and acceleration of  
51 cognitive decline.[3] Though underdiagnosed, it is highly prevalent in  
52 hospitalizations, particularly so for palliative care populations[5, 6]; as many as 50%  
53 of people over the age of 65 who are admitted to hospital experience delirium  
54 depending on the clinical setting.[2] Despite being preventable in more than a third  
55 of cases delirium remains the most common complication in hospitals today.[7]

56 A previous study in the United States, undertaken over a decade ago, assessed the  
57 costs associated with delirium after adjusting for patient sociodemographic and  
58 clinical characteristics and found that hospital costs per day for patients with  
59 delirium were more than double the costs of patients who did not experience an  
60 episode of delirium.[8] Additionally, previous studies have found associations  
61 between delirium and long-term cognitive impairment and dementia,[9] and

1  
2  
3 62 premature death.[3, 10] However, the relative costs of these outcomes have not yet  
4  
5  
6 63 been established.  
7

8  
9 64 To date, no studies have estimated the costs of delirium in Australia. Understanding  
10  
11 65 the costs of delirium is important because it is difficult to diagnose. There are no  
12  
13 66 diagnostic blood tests, x-rays or scans and hence it is often missed in as many as two  
14  
15  
16 67 thirds of cases.[11] By better understanding the costs of delirium, it is possible to  
17  
18 68 answer the question of whether it would be worthwhile to pay more attention to its  
19  
20  
21 69 prevention, diagnosis and treatment.  
22

23  
24 70 Financial costs of delirium to the Australian health system include the costs of  
25  
26 71 running hospitals and nursing homes, GP and specialist services reimbursed through  
27  
28  
29 72 Australia's universal health insurance scheme and private funds, the cost of  
30  
31 73 pharmaceuticals and over-the-counter medications, allied health services, research  
32  
33  
34 74 and health administration. Other financial costs of delirium include productivity  
35  
36 75 costs, the cost of informal care, funeral costs, and deadweight loss of taxation  
37  
38  
39 76 payments and administration. The burden of disease associated with delirium  
40  
41 77 measures pain, suffering, and premature mortality in terms of disability adjusted life  
42  
43 78 years (DALYs). Different costs of disease are borne by different individuals or sectors  
44  
45  
46 79 of society. Understanding how the costs are shared helps to make informed  
47  
48  
49 80 decisions regarding interventions.  
50

51  
52 81 The purpose of this study was to raise awareness of the impacts of delirium and  
53  
54 82 contribute to improving policy in this area, by quantifying the magnitude of the  
55  
56  
57  
58  
59  
60

1  
2  
3 83 economic burden associated with delirium in Australia in 2016-17 on the basis of  
4  
5  
6 84 cost-of-illness methodology.  
7

## 8 85 **METHODS**

### 9 86 **Prevalence**

10  
11  
12 87 This study was conducted using standard cost-of-illness methodology,[12] based on  
13  
14  
15 88 a prevalence approach to cost measurement. Prevalence approaches measure the  
16  
17  
18 89 number of people with a given condition in a base period and the costs associated  
19  
20  
21 90 with treating them, as well as other financial and non-financial costs in that year due  
22  
23  
24 91 to the condition. This approach is combined with both bottom-up and top-down  
25  
26  
27 92 approaches to estimate expenditure for each cost component. The methodology is  
28  
29  
30 93 consistent with previously published research in this field in Australia and  
31  
32  
33 94 internationally.[13-15]

34  
35  
36 95 A targeted literature review was conducted to identify the prevalence of delirium in  
37  
38  
39 96 acute hospitalizations, nursing homes and in the community (without presenting to  
40  
41  
42 97 hospital). The targeted review was investigative in nature and considered fit-for-  
43  
44  
45 98 purpose as the prevalence and methods vary widely across studies. The focus of the  
46  
47  
48 99 literature review was on prevalence in a hospital setting. For hospitalizations, studies  
49  
50  
51 100 were included if they provided results for general medical or surgical wards (i.e. an  
52  
53  
54 101 acute setting) for the duration of the hospital stay using validated diagnostic  
55  
56  
57 102 measures. Results from the literature searches were pooled to estimate an average  
58  
59  
60 103 prevalence that could be applied to Australian hospital separations (Additional File  
104 1).



1  
2  
3 105 No prevalence studies in Australian nursing homes were identified. Prevalence  
4  
5 106 results were thus derived from a study from the Netherlands,[16] due to similarities  
6  
7  
8 107 in aged care settings, demographic profiles and medication prescribing rates – for  
9  
10 108 example, both countries exhibit high rates of psychotropic medication prescribing  
11  
12  
13 109 (though there are some differences in the preferred antipsychotic agent),[17]  
14  
15 110 despite their limited efficacy and adverse effects in people with delirium.[6] The  
16  
17  
18 111 combined prevalence and incidence was 8.5% and 16.9 per 100 person-years  
19  
20 112 respectively. These rates are similar to the rates reported in other international  
21  
22  
23 113 literature.[18-20]

24  
25  
26 114 The total prevalence of delirium in Australia 2016-17 was adjusted to avoid double  
27  
28 115 counting people in the residential aged care cohort who also present to hospital  
29  
30  
31 116 (Additional File 1).

### 32 33 117 **Average duration of an episode of delirium and mortality**

34  
35  
36  
37 118 A targeted literature review was conducted to identify studies that reported the  
38  
39 119 average duration of delirium across hospital and residential aged care settings. The  
40  
41  
42 120 average duration of delirium was estimated by taking a weighted average of the  
43  
44 121 findings reported in twelve studies (Additional File 1). Mortality associated with  
45  
46 122 delirium was estimated using an attributable fraction approach (Additional File 1)  
47  
48  
49 123 based on a previous systematic review and meta-analysis.[3]

### 50 51 52 124 **Health care system expenditure**

53  
54  
55 125 A targeted literature review was conducted to identify studies that reported cost  
56  
57  
58 126 inputs suitable to estimate health care system expenditure. The review was

1  
2  
3 127 considered more fit-for-purpose than a systematic review given this was a cost of  
4  
5  
6 128 illness study where many of the inputs are in data sets and grey literature (e.g.  
7  
8 129 government documents), not in peer-reviewed literature.  
9

10  
11 130 Health system costs were estimated using a bottom-up approach. This includes costs  
12  
13  
14 131 associated with hospital, medication, and research expenditure, out of hospital  
15  
16 132 medical and other health professionals' expenditure, and residential aged care  
17  
18 133 expenditure. Delirium induces functional decline, resulting in a longer length of stay  
19  
20  
21 134 (LOS) for older people in hospital, consequently leading to higher hospitalization  
22  
23 135 expenditure.[2] To estimate the additional expenditure, the prevalence of delirium  
24  
25  
26 136 among hospitalized older people was applied to the additional LOS and the average  
27  
28 137 daily cost of care in a hospital setting. Cost data was sourced from the Australian  
29  
30  
31 138 Institute of Health and Welfare and the Independent Hospital Pricing Authority, who  
32  
33 139 have responsibility for reporting on health expenditure in Australia (Additional File  
34  
35  
36 140 1).

37  
38  
39 141 To estimate health research expenditure on delirium in Australia in 2016-17, this  
40  
41 142 report utilized the National Health and Medical Research Council (NHMRC) grants  
42  
43 143 database. The database outlines all NHMRC research grant funding between 2000  
44  
45  
46 144 and 2016 and provides a description of the projects and key outcomes achieved.[21]  
47  
48 145 Annual funding allocated to delirium research in 2016-17 was estimated by taking an  
49  
50  
51 146 average across the historical years. Other forms of health research where research  
52  
53 147 costs can be recovered – for example, by charging a higher price for services – were  
54  
55  
56 148 not considered in this analysis, consistent with standard methodology.[12]  
57  
58  
59  
60

1  
2  
3 149 Out of hospital medical expenditure (GP consultations) was estimated by applying  
4  
5  
6 150 the average cost per GP consultation[22] to the total services associated with  
7  
8 151 delirium.[23] Residential aged care expenditure was estimated using an attributable  
9  
10  
11 152 fraction approach based on literature to estimate admissions to aged care due to  
12  
13 153 cognitive decline associated with delirium (Additional File 1). The number of  
14  
15 154 admissions was adjusted by average LOS in residential aged care in Australia and  
16  
17  
18 155 applied to the average costs associated with residential aged care.

### 21 156 **Other financial costs**

23  
24 157 The economic cost of short run productivity losses associated with absenteeism  
25  
26 158 were estimated using the friction cost method (Additional File 1). The dollar value of  
27  
28  
29 159 informal care was estimated by using the opportunity cost method (Additional File  
30  
31 160 1). The additional cost of funerals borne by family and friends of people with  
32  
33  
34 161 delirium was based on the number of deaths associated with delirium (Additional  
35  
36 162 File 1). The cost of a funeral was assumed to be £4,602. Funeral costs were brought  
37  
38  
39 163 forward by the average life expectancy at age of death. The deadweight losses due  
40  
41 164 to lost taxation revenue (given an assumption of no change in spending) and  
42  
43  
44 165 additional government spending on delirium was calculated by applying the average  
45  
46 166 marginal excess burden of taxation of £0.31 per £1 of tax.[24, 25]

### 49 167 **Loss of wellbeing**

51  
52 168 Burden of disease methodology was employed to quantify the impact of delirium on  
53  
54 169 wellbeing. The approach is non-financial, where pain, suffering and premature  
55  
56  
57 170 mortality are measured in terms of disability adjusted life years (DALYs). DALYs are

1  
2  
3 171 comprised of years of healthy life lost due to morbidity (YLDs) and years of life lost  
4  
5  
6 172 due to premature mortality (YLLs). YLDs were calculated using a prevalence  
7  
8 173 approach, whereby the disability weight was multiplied by average duration of  
9  
10 174 delirium. The disability weight for delirium used in this study was 0.17.[26] Duration  
11  
12  
13 175 of delirium was based on the prevalence of persistent delirium over 12 months.[27]  
14  
15 176 DALYs were converted to a monetary value using the value of a statistical life year  
16  
17  
18 177 (£93,882), which is an official estimate updated for inflation.[28]  
19  
20

### 21 178 **Costs of dementia attributable to delirium**

22  
23  
24 179 Costs of dementia were sourced from an Australian cost of illness study.[29] Inputs  
25  
26 180 were taken for Australia in the 2016 financial year, and updated using either health  
27  
28 181 inflation or the Consumer Price Index as appropriate. The wellbeing cost attributable  
29  
30 182 to dementia for YLLs or YLDs was estimated using data from the AIHW's Australian  
31  
32 183 Burden of Disease Study.[30] The proportion of dementia attributable to delirium  
33  
34 184 was estimated using the population attributable fraction approach (Additional File  
35  
36 185 1).  
37  
38  
39  
40

### 41 186 **Sensitivity analysis**

42  
43  
44  
45 187 One-way sensitivity analyses were conducted on prevalence, the risk for mortality,  
46  
47 188 dementia admission to aged care, average hospital costs, discount rate for DALYs,  
48  
49 189 and the value of a statistical life year. The specific values represent the upper and  
50  
51 190 lower 95% confidence intervals for the relevant input parameters where available, or  
52  
53 191 unit costs that were 25% higher or lower if the distribution was unknown.  
54  
55  
56  
57

### 58 192 **Currency standardization**

1  
2  
3 193 All costs are expressed in 2016-17 pound sterling. Costs were converted from  
4  
5 194 Australian dollars using the 2017 Organisation for Economic Cooperation and  
6  
7  
8 195 Development purchasing power parity of 2.065 Australian dollars per pound sterling  
9  
10  
11 196 in 2017.[31]  
12

## 13 14 197 **RESULTS**

### 15 16 17 198 **Health care system expenditure**

18  
19  
20 199 There were estimated to be 132,595 occurrences of delirium in Australia in 2016-17.  
21  
22 200 Delirium most commonly occurred in hospitals, with an estimated 119,760 cases.  
23  
24 201 Total health system and aged care costs associated with delirium in Australia were  
25  
26 202 estimated to be £844.2 million in 2016-17. The total comprised hospital  
27  
28 203 (£247.3 million), residential aged care (£596.2 million), out-of-hospital medical (£0.4  
29  
30 204 million), and research expenditure (£0.3 million).  
31  
32  
33  
34

### 35 205 **Other financial costs**

36  
37  
38 206 Other financial costs – including absenteeism costs (£6.6 million), informal care costs  
39  
40 207 (£0.8 million), brought forward funeral costs (£0.7 million) and deadweight losses  
41  
42 208 (£188.4 million) – for people with delirium were estimated to be £196.6 million in  
43  
44 209 Australia in 2016-17. Productivity losses imposed by delirium were estimated to be  
45  
46 210 relatively small. The cost of informal care (£0.8 million) was relatively small due to  
47  
48 211 the low opportunity cost of carer time (£0.84 per hour); informal carers provided  
49  
50 212 987,958 hours of care (see Additional file 1 for methods).  
51  
52  
53  
54  
55

### 56 213 **Loss of wellbeing**

214 The total burden of disease from delirium in 2016-17 was estimated to be  
 215 £994.1 million. Overall, people with delirium experienced: 5,441 years of healthy life  
 216 lost due to disability (YLDs), or 0.041 YLDs per person with delirium; 5,687 years of  
 217 life lost due to premature death (YLLs), or 0.043 YLLs per person with delirium; and  
 218 11,128 DALYs overall, or around 0.084 DALYs per person with delirium in 2016-17.

### 219 **Costs of dementia attributable to delirium**

220 Overall, it was estimated that 40,981 or 10.6% cases of dementia were attributable  
 221 to delirium, which largely occur in people aged 85 years or older (Additional file 1).  
 222 The total costs of dementia due to delirium were estimated to be £2.2 billion, of  
 223 which the financial costs were £675.7 million and the loss of wellbeing was  
 224 £1.6 billion. Table 1 shows cost breakdowns by age and gender group. Figure 1  
 225 shows the costs of dementia due to delirium broken down by health system and  
 226 aged care costs, other financial costs and burden of disease.

227 Table 1. Costs of delirium in Australia in 2016-17, by age and gender group, £ million

| <i>Age/<br/>gender</i> | <i>Financial cost</i> |                                 | <i>Wellbeing cost</i> |                                 | <i>Total</i>   |
|------------------------|-----------------------|---------------------------------|-----------------------|---------------------------------|----------------|
|                        | <i>Delirium</i>       | <i>Dementia due to delirium</i> | <i>Delirium</i>       | <i>Dementia due to delirium</i> |                |
| <b>Male</b>            |                       |                                 |                       |                                 |                |
| <65                    | 15.0                  | -                               | 19.5                  | -                               | <b>34.5</b>    |
| 65-69                  | 8.1                   | 7.9                             | 12.6                  | 5.1                             | <b>33.7</b>    |
| 70-74                  | 57.5                  | 22.3                            | 26.8                  | 18.2                            | <b>124.8</b>   |
| 75-89                  | 81.9                  | 48.2                            | 43.7                  | 67.6                            | <b>241.4</b>   |
| 80-84                  | 124.6                 | 67.9                            | 89.5                  | 126.3                           | <b>408.4</b>   |
| 85+                    | 233.5                 | 154.1                           | 260.6                 | 368.2                           | <b>1,016.3</b> |
| <b>Female</b>          |                       |                                 |                       |                                 |                |
| <65                    | 14.7                  | -                               | 18.7                  | -                               | <b>33.4</b>    |
| 65-69                  | 7.0                   | 9.8                             | 10.8                  | 7.2                             | <b>34.8</b>    |
| 70-74                  | 52.2                  | 14.6                            | 22.4                  | 13.8                            | <b>103.0</b>   |
| 75-79                  | 81.0                  | 47.1                            | 39.7                  | 72.2                            | <b>240.0</b>   |
| 80-84                  | 121.9                 | 71.1                            | 80.3                  | 144.0                           | <b>417.4</b>   |

|                |                |              |              |                |                |
|----------------|----------------|--------------|--------------|----------------|----------------|
| 85+            | 243.3          | 232.9        | 369.4        | 729.0          | <b>1,574.6</b> |
| <b>Overall</b> | <b>1,040.8</b> | <b>675.7</b> | <b>994.1</b> | <b>1,551.6</b> | <b>4,262.2</b> |

228

229 (INSERT FIGURE 1)

230 **Total costs**

231 The total costs of delirium in Australia were estimated to be £4.3 billion

232 (AUD8.8 billion) in 2016-17. The total cost comprised financial costs of £1.7 billion

233 (AUD3.5 billion) and the value of healthy life lost of £2.5 billion (AUD5.3 billion).

234 Table 2 shows the costs of delirium broken down by health system and aged care

235 costs, other financial costs, and burden of disease.

236 Table 2. Costs of delirium in Australia in 2016-17, by cost component

| <i>Cost component</i>       | <i>Total (£ million)</i> | <i>Per person with delirium (£)</i> |
|-----------------------------|--------------------------|-------------------------------------|
| Health system and aged care | 1,299.9                  | 9,804                               |
| Other financial costs       | 416.6                    | 3,142                               |
| Loss of wellbeing           | 2,545.7                  | 19,199                              |
| <b>Total costs</b>          | <b>4,262.2</b>           | <b>32,145</b>                       |

237

238 **Sensitivity analysis**

239 The results and specific values for the sensitivity analysis are shown in Table 3 and

240 Figure 2. The total cost of delirium in Australia was most sensitive to changes in the

241 risk for dementia following delirium and the overall prevalence rate. The total cost of

242 delirium was estimated to range from £2.6 billion to £5.9 billion in Australia in

243 2016-17.

244 Table 3. Sensitivity analysis, £ million

| <i>Variable</i>                                          | <i>Financial</i> | <i>Loss of wellbeing</i> | <i>Total</i> |
|----------------------------------------------------------|------------------|--------------------------|--------------|
| Base case                                                | 1,716.5          | 2,545.7                  | 4,262.2      |
| Prevalence (20.2%)                                       |                  |                          |              |
| Lower (17.0%)                                            | 1,333.3          | 2,110.6                  | 3,443.9      |
| Upper (23.3%)                                            | 2,141.1          | 2,993.6                  | 5,134.7      |
| Risk for mortality (OR = 1.77)                           |                  |                          |              |
| Upper (OR = 2.15)                                        | 1,716.8          | 2,757.9                  | 4,474.8      |
| Lower (OR = 1.39)                                        | 1,716.2          | 2,316.7                  | 4,032.9      |
| Risk for dementia (OR for >65 = 5.88, OR for >85 = 7.56) |                  |                          |              |
| Upper (OR for >65 = 20.70, OR for >85 = 29.43)           | 2,191.0          | 3,678.2                  | 5,869.2      |
| Lower (OR for >65 = 1.69, OR for >85 = 1.96)             | 1,213.0          | 1,372.8                  | 2,585.8      |
| Risk for admission to aged care (OR = 2.41)              |                  |                          |              |
| Upper (OR = 3.29)                                        | 1,993.3          | 2,545.7                  | 4,539.0      |
| Lower (OR = 1.77)                                        | 1,453.8          | 2,545.7                  | 3,999.6      |
| Average hospital costs*                                  |                  |                          |              |
| Upper (+25%)                                             | 1,794.7          | 2,545.7                  | 4,340.4      |
| Lower (-25%)                                             | 1,638.4          | 2,545.7                  | 4,184.1      |
| Discount rate for DALYs (3%)                             |                  |                          |              |
| Upper (7%)                                               | 1,716.5          | 2,488.6                  | 4,205.1      |
| Lower (0%)                                               | 1,716.5          | 2,596.3                  | 4,312.9      |

245 \* hospital costs were varied for delirium only, not dementia.

246

247 (INSERT FIGURE 2)

## 248 DISCUSSION

249 This is the first study to estimate the economic impact of delirium in the Australian  
 250 population using cost of illness methodology. While a number of studies have  
 251 examined the financial costs of delirium, they are generally limited to specific  
 252 services or population subgroups.[4] There have been no previous attempts to  
 253 estimate the cost of delirium taking into account both the financial and wellbeing



1  
2  
3 254 costs for the entire population, as this study has done. It is critical that such  
4  
5  
6 255 economic estimations are undertaken as they inform decision making.  
7  
8  
9 256 According to our findings, delirium poses a substantial burden on society.  
10  
11 257 Considering delirium alone, the economic costs were mostly incurred by the health  
12  
13  
14 258 and aged care systems (£844.2 million), representing close to 1.5% of total  
15  
16 259 expenditure on health and aged care in Australia. As many high-income western  
17  
18  
19 260 countries are dealing with issues of aging demographics and cognitive impairment,  
20  
21 261 our findings may be generalizable to other health and aged care systems. For  
22  
23  
24 262 example, previous research has found that delirium is associated with multiple  
25  
26 263 adverse outcomes including increased length and cost of hospitalization, functional  
27  
28 264 and cognitive decline, institutionalization, and mortality.[2-4, 32] These results have  
29  
30  
31 265 significant implications for governments, who aim to identify conditions with high  
32  
33 266 social and financial costs for focused attention through public education and other  
34  
35  
36 267 initiatives that effect improvements in health status. The results of this study  
37  
38 268 highlight the need for concerted, worldwide efforts to mitigate the impacts of this  
39  
40  
41 269 clinically significant and costly medical condition.  
42  
43  
44 270 There were 132,595 occurrences of delirium in Australia in 2016-17, but data from  
45  
46 271 the Australian Institute of Health and Welfare (AIHW) National Hospital Morbidity  
47  
48  
49 272 Database for 2015-16 indicate that as many as 1 in 5 cases are missed. This is  
50  
51 273 supported by previous research which suggests that delirium is undiagnosed in a  
52  
53  
54 274 large number of cases, ranging from approximately 25% of cases up to 87.5% in  
55  
56 275 cases where dementia is also present.[11] This has significant implications for clinical  
57  
58  
59  
60

1  
2  
3 276 practice as the outcomes of delirium are serious.[1] Future research could focus on  
4  
5 277 techniques to improve the detection rate.  
6  
7

8  
9 278 Dementia represents a significant cost to the economy of all countries; the cost of  
10  
11 279 dementia due to delirium is therefore an important cost component of delirium. It  
12  
13 280 has been estimated that 47 million people are living with dementia globally, with  
14  
15 281 costs of £583 billion; moreover, prevalence is expected to triple over the next three  
16  
17 282 decades.[33] Overall, the costs of dementia attributable to delirium more than  
18  
19 283 doubled the total costs of delirium in Australia in 2016-17. We found that  
20  
21 284 approximately 10.6% of dementia cases, and thus costs, are associated with  
22  
23 285 delirium. Therefore, delirium imposes a large cost burden on residential aged care,  
24  
25 286 due to the high prevalence of dementia and the strong relationships between  
26  
27 287 cognitive impairment and aged care. There may be considerable opportunities to  
28  
29 288 prevent some of the worldwide burden of dementia and improve the fiscal  
30  
31 289 sustainability of health systems in the face of aging populations.  
32  
33  
34  
35  
36  
37

38  
39 290 Care for delirium following discharge from hospital relies heavily on informal carers,  
40  
41 291 who provided almost 1 million hours of care to people with delirium. As workforce  
42  
43 292 participation increases and the propensity to care declines,[34] there is a risk that  
44  
45 293 the care needs of people with delirium will either go unmet, or require additional  
46  
47 294 government funding for aged care to meet their needs.  
48  
49  
50

51  
52 295 There are some limitations to this study. First, the methods outlined the use of a  
53  
54 296 non-systematic search strategy, noting that this was fit-for-purpose when a number  
55  
56 297 of inputs were derived from official Australian Government statistics. The estimates  
57  
58  
59  
60

1  
2  
3 298 presented should be interpreted with this in mind. Second, limited studies were  
4  
5  
6 299 found with appropriate methods to robustly estimate the prevalence of delirium in  
7  
8 300 Australian hospital settings, but also in community or residential aged care settings.  
9  
10 301 In order to minimize the impact of this limitation and the risk of double counting  
11  
12  
13 302 across studies, our analysis focused on delirium which met the full diagnostic criteria.  
14  
15 303 Similarly, data paucity in some areas, such as out-of-hospital medical costs and  
16  
17 304 productivity losses (employment outcomes) means that total estimates may be  
18  
19  
20 305 conservative. Given the methodology, the costs of delirium presented in this paper  
21  
22  
23 306 should be treated as an estimate only. More research, including observational  
24  
25 307 studies in Australian settings, is required to understand the true costs incurred by  
26  
27 308 people with delirium. However, a study that can capture costs across the health  
28  
29  
30 309 system and aged care settings in Australia will be technically challenging and may  
31  
32 310 not be feasible due to the fragmented nature of the systems and data collection –  
33  
34  
35 311 particularly beyond the point at which people interact with the system. Finally, cost  
36  
37 312 of illness studies provide guidance on the size of the problem, but are only useful for  
38  
39  
40 313 informing cost effective options for change when compared to the cost of such  
41  
42 314 interventions. More work is needed to identify cost effective options to reduce the  
43  
44  
45 315 burden of delirium in Australia.

## 316 **CONCLUSION**

317 In summary, delirium imposes a substantial burden on Australian society – both in  
318 terms of financial costs associated with health system expenditure and a greater  
319 need for residential aged care due to the functional and cognitive decline associated

1  
2  
3 320 with delirium and dementia. The financial costs of delirium were largely borne by  
4  
5  
6 321 Australian governments due to the health system and aged care expenditure.  
7  
8  
9 322 Further research should seek to understand the causes, treatment and prognosis of  
10  
11 323 delirium, especially with regard to potential pathways from an episode of delirium to  
12  
13 324 subsequent mortality outcomes and reduced cognitive functioning. Improving  
14  
15  
16 325 mortality outcomes and reducing decline in cognitive functioning would help to  
17  
18 326 reduce the substantial financial and wellbeing costs of delirium.  
19  
20

## 21 327 **ACKNOWLEDGEMENTS**

### 22 328 **Author contributions:**

23  
24  
25  
26  
27  
28 329 LP, JS and GC designed the study. JS and JH collected the data. All authors  
29  
30 330 contributed to the analysis and interpretation of the data. All authors read,  
31  
32 331 commented on and approved the draft manuscript and reviewed the manuscript for  
33  
34 332 important intellectual content. The sponsor was not directly involved in the findings  
35  
36 333 of the research.  
37  
38  
39  
40

### 41 334 **Conflicts of interest**

42  
43  
44 335 The authors declare that they have no competing interests.  
45  
46

### 47 336 **Funding sources**

48  
49  
50 337 The research was supported by the Australasian Delirium Association.  
51  
52

### 53 338 **Patient and public involvement**

54  
55  
56 339 Patient and public were not involved in this study.  
57  
58  
59  
60

1  
2  
3 340 **Data sharing statement**  
4

5  
6 341 No additional data are available.  
7

8  
9 342 **FIGURE LEGENDS**  
10

11  
12  
13 343 Figure 1 Costs of delirium and dementia due to delirium in Australia in 2016-17, £  
14  
15 344 million.  
16

17  
18 345 Figure 2 Sensitivity analysis (tornado diagram) showing the impact of key parameter  
19  
20 346 inputs on the total cost of delirium in Australia in 2016 17.  
21  
22  
23  
24  
25  
26  
27  
28  
29  
30  
31  
32  
33  
34  
35  
36  
37  
38  
39  
40  
41  
42  
43  
44  
45  
46  
47  
48  
49  
50  
51  
52  
53  
54  
55  
56  
57  
58  
59  
60

## REFERENCES

1. Caplan GA, Kurrle S, Cumming A. Appropriate care for older people with cognitive impairment in hospital. *Med J Aust.* 2016;205(10):S12-S15. doi: 10.5694/mja15.00898 [published online first: 21 Nov 2016].
2. Inouye S, Westendorp R, Sacynski J. Delirium in elderly people. *Lancet.* 2014;383:911-922.
3. Witlox J, Eurelings LS, de Jonghe JF, et al. Delirium in elderly patients and the risk of postdischarge mortality, institutionalization, and dementia: a meta-analysis. *JAMA.* 2010;304(4):443-451.
4. Leslie D, Inouye S. The importance of delirium: economic and societal costs. *J Am Geriatr Soc.* 2011;59(2):241-243.
5. Siddiqi N, House AO, Holmes JD. Occurrence and outcome of delirium in medical in-patients: a systematic literature review. *Age Ageing.* 2006;35:350-364.
6. Mittal V, Sunanda M, Williamson D, et al. Delirium in the elderly: A comprehensive review. *Am J Alzheimers Dis Other Demen.* 2011;26(2):97-109.
7. Johansson YA, Bergh I, Ericsson I, Sarenmalm EK. Delirium in older hospitalized patients—signs and actions: a retrospective patient record review. *BMC Geriatrics.* 2018;18(1):43.

- 1  
2  
3 8. Leslie D, Marcantonio ER, Zhang Y et al. One-year health care costs associated  
4  
5 with delirium in the elderly population. *Arch Intern Med.* 2008;168(1):27-32.  
6  
7
- 8  
9 9. Pandharipande PP, Girard TD, Jackson JC, et al. Long-term cognitive  
10  
11 impairment after critical illness. *N Engl J Med.* 2013;369(14):1306-1316.  
12  
13
- 14  
15 10. Leslie DL, Zhang Y, Holford TR et al. Premature death associated with delirium  
16  
17 at 1-year follow-up. *Arch Intern Med.* 2005;165:1657-1662.  
18  
19
- 20  
21 11. Speed G, Wynaden D, McGowan S, et al. Prevalence rate of delirium at two  
22  
23 hospitals in Western Australia. *Aust J Adv Nurs.* 2007;25(1):38-43.  
24  
25
- 26  
27 12. Segel JE. Cost-of-illness studies- A primer. RTI-UNC Center of Excellence in  
28  
29 Health Promotion Economics. 2006. Available from:  
30  
31 [https://www.rti.org/sites/default/files/resources/COI\\_Primer.pdf](https://www.rti.org/sites/default/files/resources/COI_Primer.pdf) (accessed  
32  
33 11 Dec 2017).  
34  
35
- 36  
37 13. Pezzullo L, Streatfeild J, Simkiss P, Shickle D. The economic impact of sight  
38  
39 loss and blindness in the UK adult population. *BMC Health Serv Res.*  
40  
41 2018;18:63.  
42  
43  
44
- 45  
46 14. Hillman D, Mitchell S, Streatfeild J, et al. The economic cost of inadequate  
47  
48 sleep. *Sleep.* 2018;41(8):zsy083. doi.org/10.1093/sleep/zsy083 [published  
49  
50 online first: 4 Jun 2018].  
51  
52  
53
- 54  
55 15. Taylor HR, Pezzullo ML, Keeffe JE. The economic impact and cost of visual  
56  
57 impairment in Australia. *Br J Ophthalmol.* 2006;90:272-5.  
58  
59  
60

- 1  
2  
3 16. Boorsma M, Joling KJ, Frijters DH, et al. The prevalence, incidence and risk  
4  
5 factors for delirium in Dutch nursing homes and residential care homes.  
6  
7 Intern J Geriatr Psychiatry. 2011; 27(7): 709-715.  
8  
9
- 10  
11 17. Taxis K, Kochen S, Wouters H, et al. Cross-national comparison of medication  
12  
13 use in Australian and Dutch nursing homes. Age ageing. 2016;46(2):320-3.  
14  
15 doi:10.1093/ageing/afw218 [published online first: 14 Dec 2016].  
16  
17
- 18  
19 18. McCusker J, Cole MG, Voyer P, et al. Prevalence and incidence of delirium in  
20  
21 long-term care. Int J Geriatr Psychiatry. 2011; 26(11): 1152-1161.  
22  
23
- 24  
25 19. Dosa D, Intrator O, McNicoll L, et al. Preliminary derivation of a nursing home  
26  
27 confusion assessment method based on data from the minimum data set. J  
28  
29 Am Geriatr Soc. 2007; 55(7): 1099-1105.  
30  
31
- 32  
33 20. Kiely, DK, Bergmann, MA, Murphy KM, et al. Delirium among newly admitted  
34  
35 postacute facility patients: prevalence, symptoms, and severity. J Gerontol A  
36  
37 Biol Sci Med Sci. 2003; 58(5): M441-M445.  
38  
39
- 40  
41 21. National Health and Medical Research Council. Research Funding Statistics  
42  
43 and Data: All Grants 2000-2016. 2017. Available from:  
44  
45 [https://www.nhmrc.gov.au/grants-funding/research-funding-statistics-and-](https://www.nhmrc.gov.au/grants-funding/research-funding-statistics-and-data)  
46  
47 [data](https://www.nhmrc.gov.au/grants-funding/research-funding-statistics-and-data) (accessed 6 Dec 2017).  
48  
49
- 50  
51 22. Department of Health. Annual Medicare Statistics – Financial Year 1984-85 to  
52  
53 2015-16. 2016. Available from: <http://www.health.gov.au/medicarestats>  
54  
55  
56  
57  
58 (accessed 6 Dec 2017).  
59  
60



- 1  
2  
3  
4  
5  
6  
7  
8  
9  
10  
11  
12  
13  
14  
15  
16  
17  
18  
19  
20  
21  
22  
23  
24  
25  
26  
27  
28  
29  
30  
31  
32  
33  
34  
35  
36  
37  
38  
39  
40  
41  
42  
43  
44  
45  
46  
47  
48  
49  
50  
51  
52  
53  
54  
55  
56  
57  
58  
59  
60
23. Charles J, Miller G, Ng A. Management of psychosis in Australian general practice. *Aust Fam Physician*. 2006;35(3):88.
24. KPMG Econtech. (2010). CGE analysis of the current Australian tax system, Report for the Australian Government. 2010. Available from: [http://www.taxreview.treasury.gov.au/content/html/commissioned\\_work/downloads/KPMG\\_Econtech\\_Efficiency%20of%20Taxes\\_Final\\_Report.pdf](http://www.taxreview.treasury.gov.au/content/html/commissioned_work/downloads/KPMG_Econtech_Efficiency%20of%20Taxes_Final_Report.pdf) (accessed 6 Dec 2017).
25. Cao L, Hosking A, Kouparitsas M, et al. Understanding the economy-wide efficiency and incidence of major Australian taxes. 2015. Available from: <http://www.apo.org.au/system/files/54294/apo-nid54294-99131.docx> (accessed 6 Dec 2017).
26. Stouthard, ME, Essink-Bot, ML, Bonsel GJ, et al. Disability weights for diseases in the Netherlands. Rotterdam, The Netherlands: Department of Public Health, Erasmus University; 1997.
27. Cole MG, Ciampi A, Belzile E, et al. Persistent delirium in older hospital patients: a systematic review of frequency and prognosis. *Age Ageing*. 2009;28(1):19-26.
28. Department of Prime Minister and Cabinet. Best practice regulation guidance note: Value of statistical life. 2014. Available from: [https://www.pmc.gov.au/sites/default/files/publications/Value\\_of\\_Statistical\\_Life\\_guidance\\_note.pdf](https://www.pmc.gov.au/sites/default/files/publications/Value_of_Statistical_Life_guidance_note.pdf) (accessed 11 Dec 2017).

- 1  
2  
3 29. Brown L, Hansnata E, La, HA. Economic Cost of Dementia in Australia. 2017.  
4  
5 Available from:  
6  
7  
8 [https://staff.dementia.org.au/files/NATIONAL/documents/The-economic-](https://staff.dementia.org.au/files/NATIONAL/documents/The-economic-cost-of-dementia-in-Australia-2016-to-2056.pdf)  
9  
10 [cost-of-dementia-in-Australia-2016-to-2056.pdf](https://staff.dementia.org.au/files/NATIONAL/documents/The-economic-cost-of-dementia-in-Australia-2016-to-2056.pdf) (accessed 6 Dec 2017).  
11  
12  
13  
14 30. Australian Institute of Health and Welfare. Australian burden of disease  
15  
16 study: Impacts and causes of illness and death in Australia 2011. 2016; AIHW  
17  
18 Australian burden of disease study series no. 3. BOD 4. Available from:  
19  
20 [https://www.aihw.gov.au/getmedia/d4df9251-c4b6-452f-a877-](https://www.aihw.gov.au/getmedia/d4df9251-c4b6-452f-a877-8370b6124219/19663.pdf.aspx?inline=true)  
21  
22 [8370b6124219/19663.pdf.aspx?inline=true](https://www.aihw.gov.au/getmedia/d4df9251-c4b6-452f-a877-8370b6124219/19663.pdf.aspx?inline=true) (accessed 6 Dec 2017).  
23  
24  
25  
26  
27 31. Organisation for Economic Cooperation and Development. Purchasing power  
28  
29 parities (PPP). 2018; Available from:  
30  
31 <https://data.oecd.org/conversion/purchasing-power-parities-ppp.htm>  
32  
33  
34 (accessed 15 June 2018).  
35  
36  
37  
38 32. Dasgupta M, Hillier L. Factors associated with prolonged delirium: a  
39  
40 systematic review. *Int Psychogeriatr*. 2010;22(3):373-394.  
41  
42  
43  
44 33. Livingston G, Sommerlad A, Orgeta V, et al. Dementia prevention,  
45  
46 intervention, and care. *Lancet*. 2017;390(10113):2673-734.  
47  
48 [dx.doi.org/10.1016/S0140-6736\(17\)31363-6](https://doi.org/10.1016/S0140-6736(17)31363-6) [published online first: 20 Jul  
49  
50 2017].  
51  
52  
53  
54 34. Deloitte Access Economics. The economic value of informal care in Australia  
55  
56 in 2015, 2015 Jun; Available from:  
57  
58  
59  
60

1  
2  
3  
4  
5  
6  
7  
8  
9  
10  
11  
12  
13  
14  
15  
16  
17  
18  
19  
20  
21  
22  
23  
24  
25  
26  
27  
28  
29  
30  
31  
32  
33  
34  
35  
36  
37  
38  
39  
40  
41  
42  
43  
44  
45  
46  
47  
48  
49  
50  
51  
52  
53  
54  
55  
56  
57  
58  
59  
60

[http://www.carersaustralia.com.au/storage/Access%20Economics%20Report](http://www.carersaustralia.com.au/storage/Access%20Economics%20Report.pdf)  
.pdf (accessed 20 Dec 2017).

For peer review only

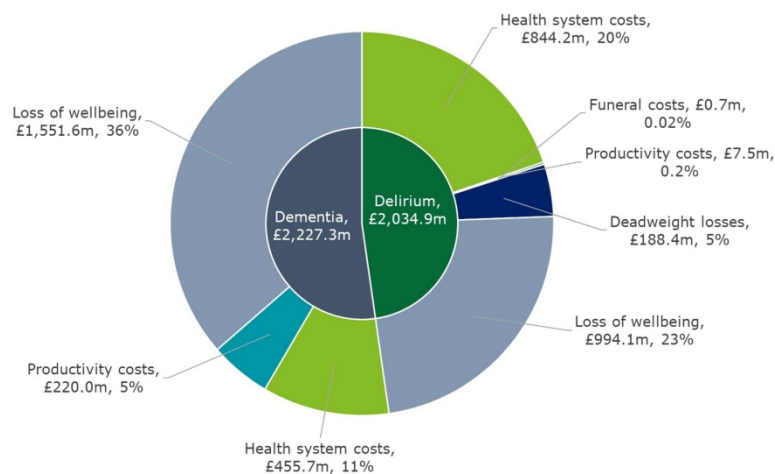

Figure 1 Costs of delirium and dementia due to delirium in Australia in 2016-17, £ million

174x90mm (300 x 300 DPI)

1  
2  
3  
4  
5  
6  
7  
8  
9  
10  
11  
12  
13  
14  
15  
16  
17  
18  
19  
20  
21  
22  
23  
24  
25  
26  
27  
28  
29  
30  
31  
32  
33  
34  
35  
36  
37  
38  
39  
40  
41  
42  
43  
44  
45  
46  
47  
48  
49  
50  
51  
52  
53  
54  
55  
56  
57  
58  
59  
60

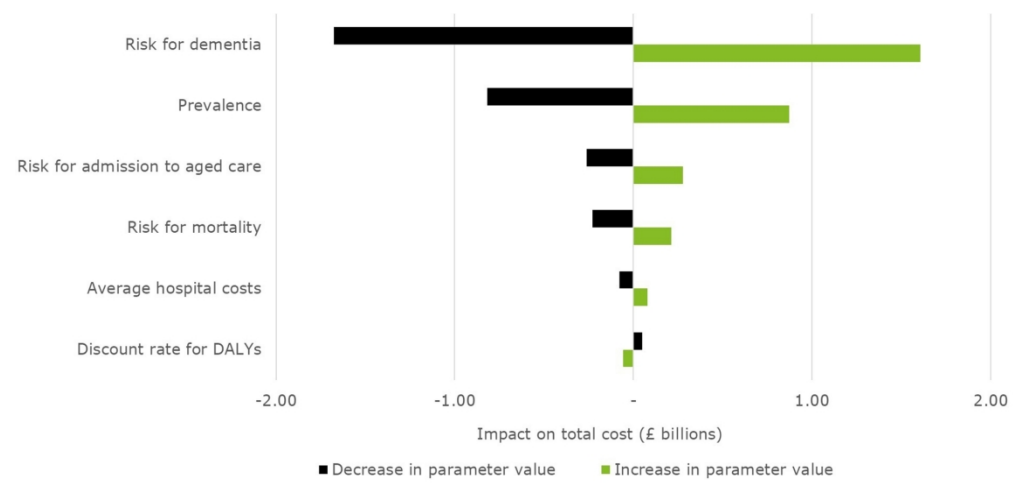

Figure 2 Sensitivity analysis (tornado diagram) showing the impact of key parameter inputs on the total cost of delirium in Australia in 2016-17

180x90mm (300 x 300 DPI)

The economic impact of delirium in Australia in 2016-17: a cost of illness study

**Additional File 1. Supplementary methods**

1  
2  
3  
4  
5  
6  
7  
8  
9  
10  
11  
12  
13  
14  
15  
16  
17  
18  
19  
20  
21  
22  
23  
24  
25  
26  
27  
28  
29  
30  
31  
32  
33  
34  
35  
36  
37  
38  
39  
40  
41  
42  
43  
44  
45  
46  
47  
48  
49  
50  
51  
52  
53  
54  
55  
56  
57  
58  
59  
60

|          |                                                                             |    |
|----------|-----------------------------------------------------------------------------|----|
| <b>1</b> | <b>Epidemiology</b> .....                                                   | 2  |
|          | 1.1 Prevalence in episodes of acute hospital care .....                     | 2  |
|          | 1.2 Prevalence in residential aged care .....                               | 4  |
|          | 1.3 Adjusted prevalence estimates.....                                      | 4  |
|          | 1.4 Duration of delirium episodes.....                                      | 6  |
|          | 1.5 Mortality associated with delirium .....                                | 7  |
| <b>2</b> | <b>Health and aged care system costs</b> .....                              | 9  |
|          | 2.1 Hospital expenditure.....                                               | 9  |
|          | 2.2 Out of hospital medical and other health professional expenditure ..... | 11 |
|          | 2.3 Residential aged care expenditure.....                                  | 12 |
| <b>3</b> | <b>Other financial costs</b> .....                                          | 15 |
|          | 3.1 Absenteeism costs .....                                                 | 15 |
|          | 3.2 Informal care costs.....                                                | 16 |
| <b>4</b> | <b>Dementia attributed to delirium</b> .....                                | 18 |
| <b>5</b> | <b>References</b> .....                                                     | 19 |

For peer review only

## The economic impact of delirium in Australia in 2016-17: a cost of illness study

1  
2  
3 **1 1 Epidemiology**

4  
5  
6  
7  
8  
9  
10  
11  
12  
13  
14  
15  
16  
17  
18  
19  
20  
21  
22  
23  
24  
25  
26  
27  
28  
29  
30  
31  
32  
33  
34  
35  
36  
37  
38  
39  
40  
41  
42  
43  
44  
45  
46  
47  
48  
49  
50  
51  
52  
53  
54  
55  
56  
57  
58  
59  
60

2 A targeted rather than systematic literature review was performed to identify relevant articles with the purpose of identifying the prevalence of delirium within hospital settings and in residential aged care facilities, the duration of delirium, and mortality due to delirium.

5 **1.1 Prevalence in episodes of acute hospital care**

6 There are numerous studies estimating the prevalence (generally at admission) and incidence (during hospitalisation) of delirium in hospitals. Prevalence on admission to hospital is typically for a cause other than delirium,<sup>1</sup> although delirium may still be present on admission to the emergency department.<sup>2</sup> Prevalence can vary widely depending on the type of hospital or the ward.<sup>3</sup> Results from the literature search were pooled to estimate an average prevalence that can be applied to Australian hospital separations<sup>a</sup>. The studies, characteristics and pooled results are shown in Table 1.1.

13 **Table 1.1: Occurrence rates of delirium**

| Author, year                                      | Country | Sample restrictions                     | Sample size | Mean age (SD) | Assessment frequency                                              | Occurrence/prevalence (%) |
|---------------------------------------------------|---------|-----------------------------------------|-------------|---------------|-------------------------------------------------------------------|---------------------------|
| <b>Sources cited in Siddiqi et al<sup>4</sup></b> |         |                                         |             |               |                                                                   |                           |
| Braekhus 1994                                     | Norway  | > 75 years                              | 58          | 83.1          | Every 3 days                                                      | 24.1                      |
| Cameron 1987                                      | US      | No age restriction                      | 133         | 68.8          | On request                                                        | 15.0                      |
| Feldman 1999                                      | Israel  | >70 years, admissions to geriatric unit | 61          | 83.2 (6.8)    | Every 2 days for 14 days, intermittently until discharge or death | 18.0                      |
| Jitapunkul 1992                                   | UK      | Admissions to geriatric unit            | 184         | 81.7 (6.6)    | At admission, 1 week, discharge and case record review            | 21.7                      |
| Johnson 1990                                      | US      | >70 years                               | 235         | 78 (6.0)      | Within 24 hours and every day                                     | 20.4                      |
| O'Keefe 1996                                      | Ireland | No age restriction                      | 225         | 82 (4.0)      | Within 24 hours and every 2 days                                  | 41.8                      |
| Rockwood 1989                                     | Canada  | Elderly                                 | 80          | 76.8          | Daily                                                             | 25.0                      |
| Rockwood 1993                                     | Canada  | Admissions to geriatric unit            | 168         | 79 (8.0)      | At admission, timing not clear                                    | 25.6                      |

<sup>a</sup> Three studies from Siddiqi et al<sup>4</sup> were removed from the analysis. Two of the studies were restricted to a sample of patients who were admitted from community dwellings,<sup>5,6</sup> while one study was removed because there were insufficient details to assess the methods were appropriate as the full text article was not available in English.<sup>7</sup>

## The economic impact of delirium in Australia in 2016-17: a cost of illness study

| Author, year                                      | Country     | Sample restrictions                      | Sample size  | Mean age (SD)     | Assessment frequency                                 | Occurrence/prevalence (%) |
|---------------------------------------------------|-------------|------------------------------------------|--------------|-------------------|------------------------------------------------------|---------------------------|
| Seymour 1980                                      | Canada      | >70 years                                | 68           | 81.2              | Within 4 hours, weekly                               | 16.2                      |
| Zanocchi 1998                                     | Italy       | Admissions to geriatric unit             | 585          | 77.1              | Twice-daily                                          | 22.2                      |
| Total/weighted average                            |             |                                          | 1,797        | 80.3 (4.4)        |                                                      | 24.0                      |
| <b>Recent point-prevalence/occurrence studies</b> |             |                                          |              |                   |                                                      |                           |
| McAvay, 2006 <sup>7</sup>                         | US          | >70 years                                | 433          | 79.8 (6.3)        | Daily                                                | 12.7                      |
| Holden, 2008 <sup>8</sup>                         | New Zealand | >65 years                                | 216          | 79.3              | Every 2 days until discharge                         | 29.1                      |
| McCusker, 2003 <sup>9</sup>                       | Canada      | >65 years                                | 1,552        | 83.6 (7.4)        | -                                                    | 22.3                      |
| Inouye, 1998 <sup>10</sup>                        | US          | >65 years, medical and surgical patients | 107          | -                 | Admission and discharge                              | 25.0                      |
| Jones, 2006 <sup>11</sup>                         | US          | >70 years                                | 491          | 79.0 (6.0)        | Daily                                                | 22.0                      |
| Inouye, 1998 <sup>10</sup>                        | US          | >65 years, medical and surgical patients | 174          | -                 | Admission and discharge                              | 15.0                      |
| Ryan 2013 <sup>12</sup>                           | Ireland     | Adults, no restriction                   | 280          |                   | Point prevalence                                     | 17.6                      |
| Bellelli 2016 <sup>3</sup>                        | Italy       | >65 years                                | 1,867        | 82 (7.4)          | Point prevalence                                     | 22.9                      |
| Meagher 2014 <sup>13</sup>                        | Ireland     | Adults, no restriction                   | 311          | 76 (13.1)         | Point prevalence                                     | 16.7                      |
| Iseli 2007 <sup>14</sup>                          | Australia   | >65 years                                | 104          | 80.1 (7.0)        | At admission, follow up at 2-3 days, and then weekly | 21.0                      |
| Travers 2013 <sup>15</sup>                        | Australia   | >70 years                                | 493          | 80.4 (6.5)        | Daily                                                | 17.3                      |
| Speed 2007 <sup>16</sup>                          | Australia   | Adults, no restriction                   | 1,209        | 80.0              | Four point prevalence audits                         | 10.9                      |
| Total/weighted average                            |             |                                          | 7,237        | 81.1 (7.4)        |                                                      | 19.2                      |
| <b>Overall</b>                                    |             |                                          | <b>9,034</b> | <b>80.9 (6.6)</b> |                                                      | <b>20.2</b>               |

Source: Based on Siddiqi et al<sup>4</sup> and sources as itemised in the table. Weighted averages are based on sample size.

Patients in the included studies were admitted for more than one day. Based on data from the Australian Institute of Health and Welfare (AIHW),<sup>17</sup> it was estimated there 521,099 overnight acute emergency hospital separations for people aged 70 years or older in 2016-17. For elderly Australians, there were approximately 105,182<sup>b</sup> hospital separations involving delirium in 2016-17. There were an estimated 11,999 separations recorded as the principal diagnosis in 2016-17.<sup>18</sup> Additional diagnosis separations in younger age groups (less than 70 years old) were estimated by applying the ratio between total and principal delirium diagnoses (105,182/11,999) to principal diagnoses in the younger age groups. Based on data from the AIHW,<sup>17;18</sup> there were estimated to be 1,663 separations where delirium was recorded as the principal diagnosis in separations for people

<sup>b</sup> 105,182 = 521,099 \* 20.2%, noting small differences due to rounding.



## The economic impact of delirium in Australia in 2016-17: a cost of illness study

aged less than 70 years old in 2016-17 (after adjusting for population growth). Thus, there were an estimated 14,578 separations for younger Australians, and 119,760 total cases of delirium in Australian hospitals in 2016-17.

### 1.2 Prevalence in residential aged care

Delirium is an important consideration in residential aged care, due to the high prevalence of dementia and the strong relationships between cognitive impairment and aged care. No studies of delirium in Australian residential aged care facilities were identified. As such, it was necessary to rely on international literature from countries with demographically similar profiles.

One of the largest and perhaps most comprehensive studies of delirium in aged care was conducted in the Netherlands,<sup>19</sup> although a number of studies have been undertaken in specific aged care facilities. The combined prevalence and incidence was 8.5% and 16.9 per 100 person-years respectively. These rates are similar to the rates reported in other international literature.<sup>9;20;21</sup>

In Australia on 30 June 2015, there were 172,044 permanent residents in aged care facilities. Using estimated population growth by age group from the Australian Bureau of Statistics (ABS),<sup>22</sup> it is expected that there will be 181,314 permanent residents in aged care facilities on 30 June 2017. Applying the prevalence (at baseline), and the incidence per 100 person years from Boorsma et al,<sup>19,c</sup> it was estimated that 46,054 permanent residents had delirium in 2016-17.

### 1.3 Adjusted prevalence estimates

There is potential for overlap in the prevalence estimates across hospital settings and residential aged care settings. As such, the prevalence estimates require adjustment to remove the double counting of people who had delirium in two care settings. A targeted literature search was conducted to estimate prevalence of delirium at admission and discharge from hospital, including information on dwelling characteristics (i.e. whether the person with delirium usually resides in

---

<sup>c</sup> It was assumed that each resident is in aged care for the full year, and so number of residents and person years are equal – i.e. no adjustments have been made for mortality in aged care facilities.

The economic impact of delirium in Australia in 2016-17: a cost of illness study

community or residential aged care). Based on the search, the following rates were used to adjust the prevalence to avoid double counting people in residential aged care who also present to hospital.

- 50% of cases were delirious at admission;<sup>23</sup>
- 43% of hospitalised patients were delirious at discharge;<sup>7</sup>
- 31.2% were admitted from residential aged care while 68.9% were admitted from the community;<sup>15</sup> and
- of people with delirium, 28% of patients were discharged to residential aged care, 63% were discharged to the community, and 9% died before discharge from hospital.<sup>10</sup>

Using the prevalence of delirium on admission to emergency departments (50% derived from Barron and Holmes<sup>23</sup>), it was estimated that 59,926 people were delirious in their usual setting before admission to hospital. Of these, 31.2% or 18,697 were admitted from residential aged care facilities. Of the total hospital prevalence, it was estimated that 51,865 were still delirious at discharge based on McAvay et al,<sup>7</sup> and that 14,522 people were discharged to residential aged care with delirium (based on Inouye et al<sup>10</sup>). Thus, of the total prevalence in residential aged care (46,054), it was estimated that 33,219 people experienced delirium in hospital and residential aged care, while the remaining 12,835 did not present to hospital.

The total adjusted prevalence in Australia was therefore estimated to be 132,595, representing the total hospital prevalence and the episodes in aged care which were not hospitalised.

## The economic impact of delirium in Australia in 2016-17: a cost of illness study

67 **Table 1.2: Total prevalence of delirium in Australia, 2016-17**

| Age / gender  | Community     | Residential aged care | Total          |
|---------------|---------------|-----------------------|----------------|
| <b>Male</b>   |               |                       |                |
| <65           | 3,278         | 1,756                 | 5,034          |
| 65-69         | 1,916         | 1,281                 | 3,197          |
| 70-74         | 4,342         | 2,088                 | 6,430          |
| 75-89         | 6,282         | 2,868                 | 9,149          |
| 80-84         | 9,680         | 3,545                 | 13,225         |
| 85+           | 18,651        | 3,263                 | 21,914         |
| <i>Total</i>  | <i>44,149</i> | <i>14,801</i>         | <i>58,949</i>  |
| <b>Female</b> |               |                       |                |
| <65           | 4,100         | 746                   | 4,846          |
| 65-69         | 1,994         | 778                   | 2,773          |
| 70-74         | 4,044         | 1,523                 | 5,567          |
| 75-89         | 6,224         | 2,771                 | 8,996          |
| 80-84         | 9,195         | 5,270                 | 14,465         |
| 85+           | 16,835        | 20,164                | 36,999         |
| <i>Total</i>  | <i>42,393</i> | <i>31,253</i>         | <i>73,646</i>  |
| <b>Total</b>  | <b>86,541</b> | <b>46,054</b>         | <b>132,595</b> |

68 Source: Authors calculations'. Note: components may not sum to totals due to rounding.

69 **1.4 Duration of delirium episodes**

70 As delirium is a transient condition, it is important to estimate the average duration of an episode of  
 71 delirium to calculate the burden imposed on society (Table 1.3).

72 **Table 1.3: Duration of delirium**

| Author, year                         | Country     | Sample restrictions                                                                                              | Sample size  | Age (SD)   | Duration (days) |
|--------------------------------------|-------------|------------------------------------------------------------------------------------------------------------------|--------------|------------|-----------------|
| Adamis, 2006 <sup>24</sup>           | England     | Elderly care unit; ≥70 years                                                                                     | 94           | 82.8 (6.5) | 8.6             |
| Andrew, 2005 <sup>25</sup>           | Canada      | Admissions to geriatric unit                                                                                     | 77           | 78.5 (7.2) | 6.3             |
| O'Keeffe, 1997 <sup>26</sup>         | Ireland     | Admissions to geriatric unit                                                                                     | 94           | 83.2 (6.8) | 7.0             |
| Pandharipande, 2013 <sup>27</sup>    | US          | Admissions to intensive care unit (ICU) with defined list of conditions; excluded those with recent ICU exposure | 606          | 61         | 4.0             |
| Rockwood, 1993 <sup>28</sup>         | Canada      | Admissions to geriatric unit, mostly admitted from community                                                     | 173          | 79 (8)     | 8.0             |
| Van den Boogaard, 2012 <sup>29</sup> | Netherlands | Admissions to ICU; excluded those admitted for < 1 day                                                           | 272          | 81.7 (6.6) | 2.0             |
| Cole, 2012 <sup>30</sup>             | Canada      | Long-term care residents                                                                                         | 279          | 87.4       | 11.3            |
| <b>Total/weighted average</b>        |             |                                                                                                                  | <b>1,595</b> |            | <b>5.9</b>      |

73 Source: sources as itemised in the table. The weighted averages were based on sample size.

## The economic impact of delirium in Australia in 2016-17: a cost of illness study

74 **1.5 Mortality associated with delirium**

75 Delirium is associated with higher rates of mortality in hospital settings, and a greater chance of  
 76 mortality occurring in the year following an episode of delirium. Mortality was estimated using an  
 77 attributable fraction approach based on literature. Witlox et al<sup>31</sup> reported an overall average  
 78 mortality rate of 38.0% compared to a rate of 27.5% with no delirium, which was a 1.4-fold increase  
 79 for those with delirium. The hazard ratio – indicating how much more likely someone with delirium  
 80 is to have died at any point in time – was estimated to be 1.95. The authors included seven studies  
 81 from the US, UK, Canada, Chile and Brazil. To estimate mortality associated with delirium for  
 82 Australia, the Chilean and Brazilian studies have been excluded from the analysis as they are  
 83 demographically less similar to Australia and there may be alternative drivers of mortality in those  
 84 countries. The hazard ratio was re-estimated by meta-analysis using a random effects model. The  
 85 final reweighted hazard ratio was estimated to be 1.77 (Table 1.5).

86 **Table 1.5: Mortality rates and hazard ratio for mortality**

| Author, year (as cited in Witlox et al <sup>31</sup> ) | Country | Subgroup         | Hazard ratio for mortality (95% confidence interval) |
|--------------------------------------------------------|---------|------------------|------------------------------------------------------|
| Gonzalez et al 2009                                    | Chile   | General medical  | 4.04 (2.19 – 7.46)                                   |
| Furlaneto and Garcez-Leme 2007                         | Brazil  | Femoral fracture | 1.28 (0.66 – 2.48)                                   |
| Leslie et al 2005                                      | US      | General medical  | 1.62 (1.13 – 2.33)                                   |
| McCusker et al, 2002                                   | Canada  | General medical  | 2.16 (1.06 – 4.41)                                   |
| Nightingale et al, 2001                                | UK      | Hip fracture     | 2.40 (1.66 – 3.48)                                   |
| Rockwood et al, 1999                                   | Canada  | General medical  | 1.80 (1.11 – 2.92)                                   |
| Francis and Kapoor, 1992                               | US      | General medical  | 1.40 (0.79 – 2.48)                                   |
| <b>Pooled estimate</b>                                 |         |                  | <b>1.95 (1.51 – 2.52)</b>                            |
| <b>Reweighted estimate</b>                             |         |                  | <b>1.77 (1.39 – 2.15)</b>                            |

87 **Source:** Based on Witlox et al<sup>31</sup>

88 The hazard ratio (1.77) based on data from Witlox et al<sup>31</sup> was applied to general population mortality  
 89 rates, including the 1.4-fold increase for mortality for people who had delirium, for the respective  
 90 age groups to estimate the number of deaths associated with delirium in 2016-17. It was expected  
 91 that 12,571 people who had delirium would die in 2016-17, noting not all mortality is due to delirium  
 92 itself (e.g. comorbid dementia or other illness may contribute to both delirium and death). Deaths

## The economic impact of delirium in Australia in 2016-17: a cost of illness study

1  
2  
3 93 due to delirium were estimated by applying the population attributable fraction to total deaths in  
4  
5 94 the delirium cohort in 2016-17.<sup>d</sup>  
6  
7  
8  
9  
10  
11  
12  
13  
14  
15  
16  
17  
18  
19  
20  
21  
22  
23  
24  
25  
26  
27  
28  
29  
30  
31  
32  
33  
34  
35  
36  
37  
38  
39  
40  
41  
42  
43  
44  
45  
46  
47  
48  
49  
50  
51  
52  
53  
54  
55  
56  
57

---

<sup>d</sup> The formula to estimate the number of deaths attributable to delirium is as follows:

$Population\ attributable\ fraction = \frac{P \cdot (HR - 1)}{P \cdot (HR - 1) + 1}$ , where P equals the prevalence rate for each age group, and HR equals the hazard ratio. The population attributable fraction is then multiplied by the total number of deaths that occur in people with delirium.

## The economic impact of delirium in Australia in 2016-17: a cost of illness study

95 **2 Health and aged care system costs**96 **2.1 Hospital expenditure**

97 Hospital expenditure data in Australia includes general public and private hospital admissions. The  
98 literature shows that delirium results in functional decline, resulting in a longer length of stay (LOS)  
99 for hospital patients, consequently leading to higher hospitalisation expenditure. To estimate the  
100 additional expenditure, the prevalence of delirium among hospitalised patients was applied to the  
101 additional LOS and the average daily cost of care in a hospital setting.

102 To establish the incremental change in LOS for hospital patients with delirium, a targeted review of  
103 the relevant literature was conducted for studies that are demographically similar to Australia and  
104 that assessed outcomes for patients admitted to general medical wards.

105 The results of these studies were weighted by sample size to estimate the additional LOS for people  
106 with delirium. On average, the LOS for people with delirium was estimated to be 24.2 days rather  
107 than 16.7 days in the control groups, a difference of 7.5 days as shown in 0. The change in LOS is  
108 similar to the average duration (5.9 days); however they may differ as people could develop an  
109 episode of delirium either before or following hospital and have days with delirium outside of a  
110 hospital setting.

## The economic impact of delirium in Australia in 2016-17: a cost of illness study

111 **Table 2.1: Additional LOS associated with delirium**

| Author, year                    | Country     | Sample characteristics                        | Sample size  | Difference in LOS |
|---------------------------------|-------------|-----------------------------------------------|--------------|-------------------|
| Alexander, 2016 <sup>32</sup>   | UK          | Admissions to general hospital                | 590          | 6.0               |
| Emond, 2017 <sup>33</sup>       | Canada      | Admissions to ICU; ≥ 65 years                 | 200          | 8.6               |
| Gaudet, 1993 <sup>34</sup>      | France      | Admissions to geriatric unit                  | 487          | 18.0              |
| Jitapunkul, 1992 <sup>35</sup>  | UK          | Admissions to acute geriatric ward; ≥60 years | 184          | 4.0               |
| Kolbeinsson, 1993 <sup>36</sup> | Iceland     | Admissions to emergency ward; ≥70 years       | 272          | 2.9               |
| McCusker, 2003 <sup>37</sup>    | Canada      | Acute care; ≥65 years                         | 359          | 3.6               |
| O'Keeffe, 1997 <sup>26</sup>    | Ireland     | Admissions to geriatric unit                  | 225          | 10.0              |
| Ramsay, 1991 <sup>38</sup>      | UK          | Admissions to acute geriatric ward            | 119          | -1.9              |
| Rockwood, 1993 <sup>28</sup>    | Canada      | Admissions to geriatric unit                  | 173          | 4.0               |
| Stevens, 1998 <sup>39</sup>     | Australia   | Admissions to general medical                 | 84           | 12                |
| Tan, 2015 <sup>40</sup>         | New Zealand | >65 years                                     | 250          | 3.8               |
| Thomas, 1988 <sup>41</sup>      | US          | Admissions to general medical ward            | 133          | 11.0              |
| <b>Total / weighted average</b> |             |                                               | <b>3,076</b> | <b>7.5</b>        |

112 Source: as itemised in table.

113 **Table 2.2: Adjusted and unadjusted difference in LOS due to delirium**

| Author, year                    | Country | Sample characteristics        | Sample size  | Unadjusted difference | Adjusted difference | Relativity  |
|---------------------------------|---------|-------------------------------|--------------|-----------------------|---------------------|-------------|
| Emond, 2017 <sup>33</sup>       | Canada  | Admissions to ICU; ≥ 65 years | 200          | 8.6                   | 8.4                 | 0.98        |
| Inouye, 1998 <sup>10</sup>      | US      | ≥65 years                     | 727          | 1.2                   | 0.5                 | 0.42        |
| McCusker, 2003 <sup>37</sup>    | Canada  | Acute care; ≥65 years         | 359          | 4.5                   | 0.5                 | 0.10        |
| O'Keeffe, 1997 <sup>26</sup>    | Ireland | Admissions to geriatric unit  | 225          | 10.0                  | 0.7                 | 0.07        |
| <b>Total / weighted average</b> |         |                               | <b>1,511</b> | <b>4.3</b>            | <b>1.5</b>          | <b>0.36</b> |

114 Source: as itemised in table.

115 The average daily cost of an acute separation was obtained from the Independent Hospital Pricing  
 116 Authority (IHPA) for 2014-15 and adjusted by the standard index rate used by IHPA (2.1%) to  
 117 estimate the cost for the 2016-17 base year.<sup>42</sup> The average cost of any separation for 2016-17 was  
 118 estimated to be \$5,239, or \$1,985 per day in 2016-17 terms.<sup>e</sup> The average daily cost was also  
 119 adjusted by an additional 14.3% to inflate for non-allocated health costs (an allowance for capital  
 120 costs) based on AIHW.<sup>43</sup> For:

<sup>e</sup> All costs are expressed in 2016-17 Australian dollars.

## The economic impact of delirium in Australia in 2016-17: a cost of illness study

- 1  
2  
3 121 • a secondary diagnosis, the average daily cost was adjusted to remove separation costs that were  
4  
5 122 unlikely to be attributable to delirium, such as costs associated with surgery<sup>f</sup>. The average daily  
6  
7 123 cost for an additional separation was estimated to be \$1,329, which was applied to hospital  
8  
9 124 prevalence as an additional diagnosis (106,098) and the additional LOS (2.7 days); and  
10  
11  
12 125 • a primary diagnosis (13,662 separations), the cost was assumed to be the same as the delirium  
13  
14 126 diagnostic resource group, which was \$9,268 in 2016-17 after updating for inflation in the National  
15  
16 127 Efficient Price.<sup>42</sup>  
17  
18  
19 128

### 2.2 Out of hospital medical and other health professional expenditure

22 129  
23  
24 130 There was limited evidence on the use of out of hospital medical and other health professional  
25  
26 131 services in Australia. A study on psychosis related presentations to general practitioners (GPs)  
27  
28 132 across Australia reported that 0.0175% of presentations were due to delirium,<sup>g</sup> although no  
29  
30 133 evidence was found for presentations to a specialist or other health professionals.<sup>44</sup> Consequently,  
31  
32 134 cost estimates are only presented for GPs.

33  
34  
35  
36 135 The ratio of presentations to GPs was applied to Medicare Statistics data from the Department of  
37  
38 136 Health's Summary Statistics by Broad Type of Service to estimate total GP consultations associated  
39  
40 137 with delirium.<sup>45</sup> After adjusting for population growth, there were estimated to be 22,640 GP  
41  
42 138 consultations associated with delirium in 2016-17.

43  
44  
45  
46 139 The average cost of a GP service was calculated based on Medicare Statistics data.<sup>45</sup> The average  
47  
48 140 cost was derived using the total benefits provided for non-referred attendances (\$5.8 billion), the  
49  
50  
51  
52  
53  
54  
55  
56

---

<sup>f</sup> This included removing pathology, imaging, prosthesis, critical care, operating room, special procedure suite, emergency department, non clinical and depreciation costs. The costs included in adjusted daily cost were ward medical, ward nursing, allied health, on-costs, ward supplies, pharmacy and hotel. The adjustment removed approximately 47% the average daily cost of a separation.

<sup>g</sup> Referred to as "organic psychosis" in the paper.



## The economic impact of delirium in Australia in 2016-17: a cost of illness study

1  
2  
3 141 number of services (129.37 million), the proportion of services which were bulk billed (83.7%), and  
4  
5 142 the average out of pocket cost (\$33.38)<sup>h</sup>.  
6  
7  
8 143 The average cost per consultation was estimated to be \$51.13 in 2016-17 terms. However, patients  
9  
10 144 may present to GPs with more than one problem, and therefore the entire cost is not directly  
11  
12 145 attributable to delirium. The average cost (\$51.13) was divided by the average number of problems  
13  
14 146 (1.55) based on a report into General Practice Activity in Australia<sup>i,46</sup>. The cost per consultation  
15  
16 147 attributable to delirium was therefore estimated to be \$32.98 in 2016-17.  
17  
18  
19

### 20 148 **2.3 Residential aged care expenditure**

21  
22 149 Admission to residential aged care is a common outcome associated with delirium. A targeted  
23  
24 150 literature review was conducted to estimate the likelihood of institutionalisation as a result of  
25  
26 151 delirium. In a systematic review and meta-analysis of published studies that had controlled for  
27  
28 152 confounding factors and illness severity, Witlox et al<sup>31</sup> reported that people with delirium have a  
29  
30 153 2.41 times greater chance of admission to aged care. The studies identified by Witlox et al<sup>31</sup> are  
31  
32 154 summarised in Table 2.4.  
33  
34  
35  
36  
37  
38  
39  
40  
41  
42  
43  
44  
45  
46  
47  
48  
49  
50  
51  
52  
53  
54  
55  
56  
57

---

58  
59 <sup>h</sup>  $(\text{Benefits} + (\text{Services} \times (1 - \frac{\text{Bulk billed rate}}{100})) \times \text{Out of pocket cost})$

60 <sup>i</sup> Britt et al<sup>46</sup> estimate an average number of problems of 1.55, total services were divided by this amount.

## The economic impact of delirium in Australia in 2016-17: a cost of illness study

155 Table 2.4: Risk of admission to aged care following delirium, outcomes at one year

| Author, year (as cited in Witlox et al <sup>31</sup> ) | Country       | Subgroup                               | Weighting (%) | Odds ratio (95% confidence interval) |
|--------------------------------------------------------|---------------|----------------------------------------|---------------|--------------------------------------|
| Bellelli et al, 2008                                   | Italy         | Acute and rehabilitation wards         | 32.35         | 2.30 (1.33-3.98)                     |
| Bickel et al, 2008                                     | Germany       | General hospital; hip surgery patients | 6.17          | 5.60 (1.60-19.65)                    |
| Giusti et al, 2006                                     | Italy         | Hospital, surgical                     | 19.66         | 2.45 (1.21-4.95)                     |
| Pitkala et al, 2005                                    | Finland       | Hospital                               | 5.61          | 0.93 (0.25-3.47)                     |
| McCusker et al, 2002                                   | Canada        | General medical                        | 6.19          | 1.15 (0.33-4.05)                     |
| Inouye et al, 1998                                     | Chicago, US   | General medical                        | 13.77         | 2.56 (1.10-5.93)                     |
| Inouye et al, 1998                                     | Cleveland, US | General medical                        | 2.74          | 8.60 (1.31-56.45)                    |
| Inouye et al, 1998                                     | Yale, US      | General medical                        | 6.26          | 3.90 (1.12-13.56)                    |
| Francis and Kapoor, 1992                               | US            | General medical                        | 7.34          | 2.00 (0.63-6.33)                     |
| <b>Pooled estimate</b>                                 |               |                                        |               | <b>2.41 (1.77-3.29)</b>              |

156 Source: Witlox et al<sup>31</sup> Note: the average follow up across the studies was 14.6 months.

157 Literature was found on the rates of institutionalisation for both those with delirium and those  
 158 without. The results are summarised in Table 2.5. Across the studies included, the average rate of  
 159 admission to aged care for people with delirium over one year of follow up was 46.8% compared  
 160 with 23.3% for those without delirium.

161 Table 2.5: Rate of admission to aged care following hospitalisation, outcomes after one year

| Author, year                    | Country       | Sample characteristics                                                | No delirium (N) | Delirium (N) | No delirium (%) | Delirium (%) |
|---------------------------------|---------------|-----------------------------------------------------------------------|-----------------|--------------|-----------------|--------------|
| Adamis, 2006 <sup>24</sup>      | England       | Elderly care unit; ≥70 years                                          | 61              | 33           | 5.3             | 40.7         |
| Cole, 1993 <sup>47</sup>        | Meta-analysis | Admissions to general medical ward; ≥60 years                         | 665             | 60           | 8.3             | 43.2         |
| Eeles, 2010 <sup>48</sup>       | UK            | Admissions to general hospital; ≥75 years                             | 175             | 103          | 17.6            | 40.5         |
| Givens, 2009 <sup>49</sup>      | US            | Admissions to general hospital, not delirious at admission; ≥70 years | 72              | 18           | 26.1            | 46.2         |
| McAvay, 2006 <sup>7</sup>       | US            | Admissions to general hospital; >70 years                             | 378             | 55           | 29.4            | 60.0         |
| <b>Total / weighted average</b> |               |                                                                       | <b>1,351</b>    | <b>269</b>   | <b>16.2</b>     | <b>45.5</b>  |

162 Source: as itemised in table.

163 The odds ratio was used to estimate the proportion of admissions to residential aged care which  
 164 were due to delirium. To determine the cost, the number of admissions attributable to delirium was

## The economic impact of delirium in Australia in 2016-17: a cost of illness study

1  
2  
3 165 multiplied by the average cost of residential aged care. The number of admissions attributable to  
4  
5 166 delirium was derived using the methods outlined in Eide and Heuch.<sup>50, j</sup>  
6  
7  
8 167 The average cost was estimated using the Aged Care Financing Authority (ACFA's) 2016 Report on  
9  
10 168 the Funding and Financing of Aged Care.<sup>51</sup> The total expenditure on residential aged care services  
11  
12 169 was \$14.9 billion in 2014-15, or \$90,793 per person in 2016-17 terms after dividing by the number of  
13  
14 170 people in residential aged care and inflating to 2017 prices using the Consumer Price Index. The  
15  
16 171 average cost per person was applied to the number of people admitted to residential aged care and  
17  
18 172 adjusted by the total LOS, to arrive at the overall cost of residential aged care attributable to  
19  
20  
21 173 delirium  
22  
23  
24  
25  
26  
27  
28  
29  
30  
31  
32  
33  
34  
35  
36  
37  
38  
39  
40  
41  
42  
43  
44  
45  
46  
47

48  
49 <sup>j</sup> First, the following two equations were solved simultaneously:

$$q1.s1 + q2.s2 = p1 \quad (1)$$

$$\frac{q1}{1-q1} * \frac{1-q2}{q2} = OR \quad (2)$$

51 where:

- 52 • q1 = probability of residential aged care placement given that an individual had delirium;
- 53 • q2 = probability of residential aged care placement given that an individual did not have delirium;
- 54 • s1 = probability of having delirium;
- 55 • s2 = probability of not having delirium;
- 56 • p1 = probability of residential aged care placement; and
- 57 • OR = odds ratio for admission to residential aged care given delirium.

58 After solving these equations for q1 and q2, the following equation gives the number of admissions to residential aged care which were  
59 attributable to delirium:

$$PAF = \frac{(q1-q2).s1}{p1}$$

## The economic impact of delirium in Australia in 2016-17: a cost of illness study

174 **3 Other financial costs**175 **3.1 Absenteeism costs**

176 People with delirium may be temporarily absent from paid employment due to being unwell during  
177 the episode of delirium. This may include days off to visit health professionals, during hospital  
178 admission, or days at home where they are not well enough to work.

179 The economic cost of short run productivity losses (temporary absenteeism) are estimated using the  
180 friction cost method, which estimates production losses for the time period required to restore  
181 production to levels before the case of delirium occurs. The friction cost method represents an  
182 employers' choice to make up lost production through overtime or employment of another  
183 employee that attracts a premium on the ordinary wage. The overtime premium represents lost  
184 employer profits, but also indicates how much an employer is willing to pay to maintain the same  
185 level of production. For this study it was assumed that the overtime rate is 40%.<sup>52</sup> The overtime  
186 premium is applied to average weekly earnings to estimate the total productivity losses.

187 Average employment rates and average weekly earnings for people with delirium are based on ABS  
188 data for the general population by age and gender.<sup>53;54</sup> This was used for all productivity loss  
189 calculations. From the literature, no studies could be located which estimated additional sick days  
190 for people with delirium. As such, the estimated duration of delirium (5.9 days) was used to inform  
191 time off work (assuming the person with delirium fully recovers before returning to work).

192 Absenteeism estimates will only occur for people with delirium who usually reside in a community  
193 (as opposed to residential aged care) setting (prevalence of 86,541). Absenteeism costs were  
194 estimated by applying the duration to the prevalence occurring in the working age population, and  
195 adjusting for average employment rates and average weekly earnings.

## The economic impact of delirium in Australia in 2016-17: a cost of illness study

196 **3.2 Informal care costs**

197 Carers are people who provide care to others in need of assistance or support. An informal carer  
198 provides this service without formal payment and does so outside of the formal care sector. An  
199 informal carer will typically be a family member or friend of the person receiving care, and usually  
200 lives in the same household as the recipient of care.

201 While informal carers are not paid for providing this care, informal care is not free in an economic  
202 sense. Time spent caring involves forfeiting time that could have been spent on paid work or  
203 undertaking leisure activities. As such, informal care can be valued as the opportunity cost  
204 associated with the loss of economic resources (labour) and the loss in leisure time valued by the  
205 carer. To estimate the dollar value of informal care, the opportunity cost method measures the  
206 formal sector productivity losses associated with caring, as time devoted to caring responsibilities is  
207 time which cannot be spent in the paid workforce.<sup>k</sup>

208 Bellelli et al<sup>55</sup> found that 26.2% of patients who developed delirium during their hospital stay  
209 required assistance from paid caregivers following discharge. The rate of paid caregiving was  
210 assumed to be comparable to informal care in Australia as the care is usually provided by family  
211 members. In order to estimate the number of care recipients for Australia, 26.2% was applied to the  
212 prevalence of delirium for people who are 65 years or older and who live in the community (total  
213 adjusted prevalence – prevalence in aged care). Therefore, it was estimated that 20,741 people  
214 would require care due to delirium in Australia in 2016-17. People with delirium required assistance  
215 with an additional 0.36 activities of daily living over a period of 12 months.<sup>56,57</sup>

216 Analysis of the Survey of Disability, Ageing and Carers,<sup>58</sup> revealed an almost linear trend, such that  
217 an additional 2.57 hours of care were provided per week for each additional activity on average.<sup>l</sup> As

---

<sup>k</sup> It is also possible to use the replacement cost method (which measures the cost of 'buying' an equivalent amount of care from the formal sector if the informal care was not supplied), and the self-valuation method (which measures how much carers themselves feel they should be paid for undertaking their responsibilities). However, these options were not explored further in this report.

<sup>l</sup> Care needs would likely depend on the type of activity for which help is required; however there was insufficient evidence to determine which activities are most influenced by delirium.

The economic impact of delirium in Australia in 2016-17: a cost of illness study

1  
2  
3 218 such, each person would receive 0.9 additional hours of care per week or 47.6 hours of care  
4  
5 219 throughout the year.  
6  
7  
8 220 The carer's opportunity cost of time was calculated based on the weighted average weekly  
9  
10 221 earnings<sup>54</sup> and the chance of being employed.<sup>53</sup>  
11  
12  
13  
14  
15  
16  
17  
18  
19  
20  
21  
22  
23  
24  
25  
26  
27  
28  
29  
30  
31  
32  
33  
34  
35  
36  
37  
38  
39  
40  
41  
42  
43  
44  
45  
46  
47  
48  
49  
50  
51  
52  
53  
54  
55  
56  
57  
58  
59  
60

For peer review only

## The economic impact of delirium in Australia in 2016-17: a cost of illness study

222 **4 Dementia attributed to delirium**

223 Epidemiological studies, and tissue, culture and animal studies, suggest that delirium leads to  
224 permanent cognitive decline and dementia.<sup>59</sup> A targeted literature review was conducted to identify  
225 studies analysing the causal link between dementia and delirium. Three studies were used to inform  
226 the odds of developing incident dementia following delirium:

- 227 • Lundstrom et al<sup>60</sup> estimated the odds ratio of developing new cases of dementia given delirium  
228 was 5.66.
- 229 • Davis et al<sup>61</sup> estimated the odds ratio of developing new cases of dementia given delirium was  
230 8.65.
- 231 • Rockwood et al<sup>62</sup> estimated the odds ratio of developing new dementia given delirium was 5.97.

232  
233 The sample for Davis et al was restricted to people over 85 years old, while Lundstrom et al and  
234 Rockwood et al included people over 65 years old. The weighted odds ratio (based on sample size)  
235 for people who are 65-84 years old was 5.88, while for people who are 85 years old or older, it was  
236 estimated to be 7.56. Using the population attributable fraction approach outlined in Eide and  
237 Heuch,<sup>50</sup> prevalence of delirium in our study and prevalence of dementia from Brown et al,<sup>63</sup> it was  
238 estimated that 40,981 (10.6%) of dementia cases were attributable to delirium.

## The economic impact of delirium in Australia in 2016-17: a cost of illness study

**5 References**

1. Curyto KJ, Johnson J, TenHave T, et al. Survival of hospitalized elderly patients with delirium: a prospective study. *Am J Geriatr Psychiatry*. 2001; 9(2): 141-147.
2. Kakuma R, Fort D, Galbaud G, et al. Delirium in older emergency department patients discharged home: effect on survival. *J Am Geriatr Soc*. 2003; 51(4): 443-450.
3. Bellelli G, Morandi A, Di Santo SG, et al. "Delirium Day": a nationwide point prevalence study of delirium in older hospitalized patients using an easy standardized diagnostic tool. *BMC Med*. 2016; 14(1): 106-117.
4. Siddiqi N, House AO, Holmes JD. Occurrence and outcome of delirium in medical in-patients: a systematic literature review. *Age and ageing*. 2006; 35(4): 350-364.
5. Bourdel-Marchasson I, Vincent S, Germain, C, et al. Delirium symptoms and low dietary intake in older inpatients are independent predictors of institutionalization: a 1-year prospective population-based study. *J Gerontol A Biol Sci Med Sci*. 2004; 59(4): M350-M354.
6. Francis J, Kapoor WN. Delirium in hospitalized elderly. *J Gen Intern Med*. 1990; 5(1): 65-79.
7. McAvay GJ, Van Ness PH, Bogardus ST, et al. Older adults discharged from the hospital with delirium: 1-year outcomes. *J Am Geriatr Soc*. 2006; 54(8): 1245-1250.
8. Holden J, Jayathissa S, Young G. Delirium among elderly general medical patients in a New Zealand hospital. *Intern Med*. 2008; 38(8): 629-634.
9. McCusker J, Cole MG, Voyer P, et al. Prevalence and incidence of delirium in long-term care. *Int J Geriatr Psychiatry*. 2011; 26(11): 1152-1161.
10. Inouye SK, Rushing JT, Foreman MD, et al. Does delirium contribute to poor hospital outcomes? *J Gen Intern Med*. 1998; 13(4): 234-242.
11. Jones RN, Yang FM, Zhang Y, et al. Does educational attainment contribute to risk for delirium? A potential role for cognitive reserve. *J Gerontol A Biol Sci Med Sci*. 2006; 61(12): 1307-1311.
12. Ryan DJ, O'Regan NA, Caoimh RÓ, et al. Delirium in an adult acute hospital population: predictors, prevalence and detection. *BMJ Open*. 2013; 3(1): e001772, doi: 10.1136/bmjopen-2012-001772.
13. Meagher D, O'Regan N, Ryan D, et al. Frequency of delirium and subsyndromal delirium in an adult acute hospital population. *Br J Psychiatry*. 2014; 205(6): 478-485.
14. Iseli RK, Brand C, Telford M, et al. Delirium in elderly general medical inpatients: a prospective study. *Intern Med J*. 2007; 37(12): 806-811.
15. Travers C, Byrne G, Pachana N, et al. Prospective observational study of dementia and delirium in the acute hospital setting. *Intern Med J*. 2013; 43(3): 262-269.



## The economic impact of delirium in Australia in 2016-17: a cost of illness study

16. Speed G, Wynaden D, McGowan S, et al. Prevalence rate of delirium at two hospitals in Western Australia. *Aust J Adv Nurs*. 2007; 25(1): 38-43.
17. Australian Institute of Health and Welfare (AIHW). (2016). Admitted patient care 2014-15, Australian hospital statistics, Health services series no. 68, cat. no. HSE 172, Canberra: AIHW.
18. Australian Institute of Health and Welfare (AIHW). (2017). Principal diagnosis data cubes. Retrieved from <http://www.aihw.gov.au/hospitals-data/principal-diagnosis-data-cubes/>.
19. Boorsma M, Joling KJ, Frijters DH, et al. The prevalence, incidence and risk factors for delirium in Dutch nursing homes and residential care homes. *Intern J Geriatr Psychiatry*. 2011; 27(7): 709-715.
20. Dosa D, Intrator O, McNicoll L, et al. Preliminary derivation of a nursing home confusion assessment method based on data from the minimum data set. *J Am Geriatr Soc*. 2007; 55(7): 1099-1105.
21. Kiely, DK, Bergmann, MA, Murphy KM, et al. Delirium among newly admitted postacute facility patients: prevalence, symptoms, and severity. *J Gerontol A Biol Sci Med Sci*. 2003; 58(5): M441-M445.
22. Australian Bureau of Statistics. Population projections, Australia, 2012 (base) to 2101 [Internet]. 2013 [cited 2017 Dec 11]; ABS, cat. no. 3222.0. Available from: <http://www.abs.gov.au/ausstats/abs@.nsf/mf/3222.0>.
23. Barron EA, Holmes J. Delirium within the emergency care setting, occurrence and detection: a systematic review. *Emerg Med J*. 2013; 30(4): 263-268.
24. Adamis D, Treloar A, Martin FC, et al. Recovery and outcome of delirium in elderly medical inpatients. *Arch Gerontol Geriatr*. 2006; 43: 289-298.
25. Andrew, MK, Freter SH, Rockwood, K. Incomplete functional recovery after delirium in elderly people: a prospective cohort study. *BMC Geriatr*. 2005; 5(1): 5.
26. O'Keeffe S, Lavan J. The prognostic significance of delirium in older hospital patients. *J Am Geriatr Soc*. 1997; 45(2): 174-178.
27. Pandharipande PP, Girard TD, Jackson JC, et al. Long-term cognitive impairment after critical illness. *N Engl J Med*. 2013; 369(14): 1306-1316.
28. Rockwood K. The occurrence and duration of symptoms in elderly patients with delirium. *J Gerontol*. 1993; 48(4)L: M162-M166.
29. van den Boogaard M, Schoonhoven L, Evers AW, et al. Delirium in critically ill patients: impact on long-term health-related quality of life and cognitive functioning. *Crit Care Med*. 2012; 40(1): 112-118.
30. Cole MG, McCusker J, Voyer P, et al. The course of delirium in older long-term care residents. *Intern J Geriatric Psychiatry*. 2012; 27(12): 1291-1297.

## The economic impact of delirium in Australia in 2016-17: a cost of illness study

31. Witlox J, Eurelings LS, de Jonghe JF, et al. Delirium in elderly patients and the risk of postdischarge mortality, institutionalization, and dementia: a meta-analysis. *Jama*. 2010; 304(4): 443-451.
32. Alexander K, Adamson J, Cunningham C, et al. The effect of delirium and dementia on length of stay (LOS) and functional recovery of patients in elderly medical wards. *Physiotherapy*. 2016; 102: e180-e181.
33. Émond M, Grenier D, Morin J, et al. Emergency department stay associated delirium in older patients. *Can Geriatr J*. 2017; 20(1): 10.
34. Gaudet MP, Pfitzenmeyer B, Tavernier-Vidal, et al. Les états confusionnels en milieu interniste gériatrique court séjour. *Psychol Méd*. 1993; 25(7): 611-614.
35. Jitapunkul S, Pillay I, Ebrahim S. Delirium in newly admitted elderly patients: a prospective study. *QJM: Intern J Med*. 1992; 83(1): 307-314.
36. Kolbeinsson H, Jonsson A. Delirium and dementia in acute medical admissions of elderly patients in Iceland. *Acta Psychiatr Scand*. 1993; 87(2): 123-127.
37. McCusker J, Cole, MG, Dendukuri N, et al. Does delirium increase hospital stay? *J Am Geriatr Soc*. 2003; 51(11): 1539-1546.
38. Ramsay R, Wright P, Katz A, et al. The detection of psychiatric morbidity and its effects on outcome in acute elderly medical admissions. *Intern J Geriatr Psychiatry*. 1991; 6(12): 861-866.
39. Stevens LE, de Moore GM, Simpson JM. Delirium in hospital: does it increase length of stay?. *Aust N Z J Psychiatry*. 1998 Dec;32(6):805-808.
40. Tan AH, Scott J. Association of point prevalence diagnosis of delirium on length of stay, 6-month mortality, and level of care on discharge at Waitemata District Health Board, Auckland. *N Z Med J*. 2015 Mar;128(1411):68-76.
41. Thomas RI, Cameron DJ, Fahs MC. A prospective study of delirium and prolonged hospital stay: exploratory study. *Arch Gen Psychiatry*. 1988 Oct 1;45(10):937-940.
42. Independent Hospital Pricing Authority (IHPA). National Hospital Cost Data Collection, Public Hospitals Cost Report, Round 19 (Financial Year 2014-15) [Internet]. 2017 Mar 2 [cited 2017 Dec 13]. Available from <https://www.ihipa.gov.au/publications/national-hospital-cost-data-collection-public-hospitals-cost-report-round-19-financial>.
43. Australian Institute of Health and Welfare (AIHW). 2004 May 11. Health system expenditure on disease and injury in Australia 2000-01, cat. no. HWE 26 [Internet]. 2004 May 11 [cited 2017 Dec 13]. Available from <https://www.aihw.gov.au/reports/health-welfare-expenditure/health-system-expenditure-on-disease-and-injury-in/contents/table-of-contents>.
44. Charles J, Miller G, Ng A. Management of psychosis in Australian general practice. *Aust Fam Physician*. 2006 Mar; 35(3): 88.

## The economic impact of delirium in Australia in 2016-17: a cost of illness study

- 1  
2  
3 45. Department of Health. Annual Medicare Statistics – Financial Year 1984-85 to 2015-16  
4 [Internet]. 2016 [cited 2017 Dec 11]. Available from  
5 <http://www.health.gov.au/medicarestats>.  
6
- 7  
8 46. Britt H, Miller GC, Henderson J, Bayram C, Harrison C, Valenti L. General practice activity in  
9 Australia 2015-16. General practice series no. 40 [Internet]. 2016 Sep [cited 2017 Dec 11].  
10 Available from:  
11 [https://ses.library.usyd.edu.au/bitstream/2123/15514/5/9781743325148\\_ONLINE.pdf](https://ses.library.usyd.edu.au/bitstream/2123/15514/5/9781743325148_ONLINE.pdf).  
12
- 13 47. Cole MG, Primeau FJ. Prognosis of delirium in elderly hospital patients. *Can Med Assoc J*.  
14 1993; 149(1): 41.  
15
- 16 48. Eeles EM, Hubbard RE, White SV, et al. Hospital use, institutionalisation and mortality  
17 associated with delirium. *Age Ageing*. 2010; 39(4): 470-475.  
18
- 19 49. Givens JL, Jones RN, Inouye SK. The overlap syndrome of depression and delirium in older  
20 hospitalized patients. *J Am Geriatr Soc*. 2009; 57(8): 1347-1353.  
21
- 22 50. Eide GE, Heuch I. Attributable fractions: fundamental concepts and their visualization. *Stat*  
23 *Methods Med Res*. 2001 Jun;10(3):159-193.  
24
- 25 51. Aged Care Financing Authority. Fourth Report on the Funding and Financing of the Aged  
26 Care Industry [Internet]. 2016 [cited 2017 Dec 11]. Available from  
27 [https://agedcare.health.gov.au/2016-report-on-the-funding-and-financing-of-the-aged-care-](https://agedcare.health.gov.au/2016-report-on-the-funding-and-financing-of-the-aged-care-industry)  
28 [industry](https://agedcare.health.gov.au/2016-report-on-the-funding-and-financing-of-the-aged-care-industry).  
29
- 30 52. Safe Work Australia. The cost of work-related injury and illness for Australian employers,  
31 workers and the community 2012-13 [Internet]. 2015 Oct 29 [cited 2017 Dec 11]. Available  
32 from: [https://www.safeworkaustralia.gov.au/system/files/documents/1702/cost-of-work-](https://www.safeworkaustralia.gov.au/system/files/documents/1702/cost-of-work-related-injury-and-disease-2012-13.docx.pdf)  
33 [related-injury-and-disease-2012-13.docx.pdf](https://www.safeworkaustralia.gov.au/system/files/documents/1702/cost-of-work-related-injury-and-disease-2012-13.docx.pdf).  
34
- 35 53. Australian Bureau of Statistics. Labour Force, Australia, Jun 2016, Cat. No. 6202.0  
36 [Internet]. 2016 Jul 14 [cited 2017 Dec 11]. Available from:  
37 [http://www.abs.gov.au/AUSSTATS/abs@.nsf/DetailsPage/6202.0Jun%202016?OpenDocume](http://www.abs.gov.au/AUSSTATS/abs@.nsf/DetailsPage/6202.0Jun%202016?OpenDocument)  
38 [nt](http://www.abs.gov.au/AUSSTATS/abs@.nsf/DetailsPage/6202.0Jun%202016?OpenDocument).  
39
- 40 54. Australian Bureau of Statistics. Average Weekly Earnings, Australia, May 2017, Cat. No.  
41 6302.0 [Internet]. 2017 Aug 17 [cited 2017 Dec 11]. Available from:  
42 [http://www.abs.gov.au/AUSSTATS/abs@.nsf/Lookup/6302.0Main+Features1May%202017?](http://www.abs.gov.au/AUSSTATS/abs@.nsf/Lookup/6302.0Main+Features1May%202017?OpenDocument)  
43 [OpenDocument](http://www.abs.gov.au/AUSSTATS/abs@.nsf/Lookup/6302.0Main+Features1May%202017?OpenDocument).  
44
- 45 55. Bellelli G, Bianchetti A, Trabucchi M. Delirium and costs of informal home care. *Arch Int*  
46 *Med*. 2008 Aug 11;168(15):1717.  
47
- 48 56. Vida S, du Fort GG, Kakuma R, et al. An 18-month prospective cohort study of functional  
49 outcome of delirium in elderly patients: activities of daily living. *Int Psychogeriatr*. 2006  
50 Dec;18(4):681-700.  
51
- 52 57. Murray AM, Levkoff SE, Wetle TT, et al. Acute delirium and functional decline in the  
53 hospitalized elderly patient. *J Gerontol*. 1993 Sep 1;48(5):M181-M186.  
54  
55  
56  
57  
58  
59  
60

## The economic impact of delirium in Australia in 2016-17: a cost of illness study

- 1
  - 2
  - 3
  - 4
  - 5
  - 6
  - 7
  - 8
  - 9
  - 10
  - 11
  - 12
  - 13
  - 14
  - 15
  - 16
  - 17
  - 18
  - 19
  - 20
  - 21
  - 22
  - 23
  - 24
  - 25
  - 26
  - 27
  - 28
  - 29
  - 30
  - 31
  - 32
  - 33
  - 34
  - 35
  - 36
  - 37
  - 38
  - 39
  - 40
  - 41
  - 42
  - 43
  - 44
  - 45
  - 46
  - 47
  - 48
  - 49
  - 50
  - 51
  - 52
  - 53
  - 54
  - 55
  - 56
  - 57
  - 58
  - 59
  - 60
58. Australian Bureau of Statistics. Microdata: Disability, Ageing and Carers, Australia, 2015, Cat. No. 4430.0.30.002 [Internet]. 2016 Oct 18 [cited 2017 Dec 11]. Available from: <http://www.abs.gov.au/AUSSTATS/abs@.nsf/Lookup/4430.0.30.002Main+Features12015>.
59. Inouye S, Westendorp R, Sacynski J. Delirium in elderly people. *Lancet*. 2014; 383: 911-922.
60. Lundström M, Edlund A, Bucht G, et al. Dementia after delirium in patients with femoral neck fractures. *J Am Geriatr Soc*. 2003 Jul 1;51(7):1002-1006.
61. Davis DH, Muniz Terrera G, Keage H, et al. Delirium is a strong risk factor for dementia in the oldest-old: a population-based cohort study. *Brain*. 2012 Aug 9;135(9):2809-2816.
62. Rockwood KE, Cosway S, Carver D, et al. The risk of dementia and death after delirium. *Age Ageing*. 1999 Oct 1;28(6):551-556.
63. Brown L, Hansnata E, La, HA. Economic Cost of Dementia in Australia [Internet]. 2017 [cited 2017 Dec 6]. Available from: <https://staff.dementia.org.au/files/NATIONAL/documents/The-economic-cost-of-dementia-in-Australia-2016-to-2056.pdf>.

# BMJ Open

## The economic impact of delirium in Australia: a cost of illness study

|                                 |                                                                                                                                                                                                                                                                                                                                                                                                                                       |
|---------------------------------|---------------------------------------------------------------------------------------------------------------------------------------------------------------------------------------------------------------------------------------------------------------------------------------------------------------------------------------------------------------------------------------------------------------------------------------|
| Journal:                        | <i>BMJ Open</i>                                                                                                                                                                                                                                                                                                                                                                                                                       |
| Manuscript ID                   | bmjopen-2018-027514.R1                                                                                                                                                                                                                                                                                                                                                                                                                |
| Article Type:                   | Research                                                                                                                                                                                                                                                                                                                                                                                                                              |
| Date Submitted by the Author:   | 19-Apr-2019                                                                                                                                                                                                                                                                                                                                                                                                                           |
| Complete List of Authors:       | Pezzullo, Lynne; Deloitte Access Economics<br>Streatfeild, Jared; Deloitte Access Economics,<br>Hickson, Josiah; Deloitte Access Economics<br>Teodorczuk, Andrew; Griffith University, School of Medicine<br>Agar, Meera ; University of Technology Sydney, Improving Palliative,<br>Aged and Chronic Care through Clinical Research and Translation<br>Caplan, Gideon; Prince of Wales Hospital, Department of Geriatric<br>Medicine |
| <b>Primary Subject Heading</b>: | Health economics                                                                                                                                                                                                                                                                                                                                                                                                                      |
| Secondary Subject Heading:      | Geriatric medicine, Health services research, Epidemiology                                                                                                                                                                                                                                                                                                                                                                            |
| Keywords:                       | HEALTH ECONOMICS, Delirium & cognitive disorders < PSYCHIATRY,<br>Dementia < NEUROLOGY                                                                                                                                                                                                                                                                                                                                                |
|                                 |                                                                                                                                                                                                                                                                                                                                                                                                                                       |

SCHOLARONE™  
Manuscripts

## The economic impact of delirium in Australia: a cost of illness study

Authors: Lynne Pezzullo<sup>1</sup>, Jared Streatfeild<sup>1</sup>, Josiah Hickson<sup>1</sup>, Andrew Teodorczuk<sup>2</sup>,  
Meera Agar<sup>3</sup>, and Gideon Caplan<sup>4,5</sup>

### Author affiliations:

1. Deloitte Access Economics Pty Ltd, Canberra, Australian Capital Territory, Australia
2. Department of School and Medicine, Griffith University, Gold Coast Campus, Queensland, Australia.
3. Improving Palliative, Aged and Chronic Care Through Clinical Research and Translation, University of Technology Sydney, Ultimo, New South Wales, Australia
4. Department of Geriatric Medicine, Prince of Wales Hospital, Sydney, New South Wales, Australia
5. Prince of Wales Clinical School, University of New South Wales, Sydney, New South Wales, Australia.

### Author emails:

Lynne Pezzullo – [lpezzullo@deloitte.com.au](mailto:lpezzullo@deloitte.com.au), Jared Streatfeild – [jstreatfeild@deloitte.com.au](mailto:jstreatfeild@deloitte.com.au), Josiah Hickson – [jhickson@deloitte.com.au](mailto:jhickson@deloitte.com.au), Andrew Teodorczuk - [a.teodorczuk@griffith.edu.au](mailto:a.teodorczuk@griffith.edu.au), Meera Agar – [meera.agar@uts.edu.au](mailto:meera.agar@uts.edu.au), Gideon Caplan – [g.caplan@unsw.edu.au](mailto:g.caplan@unsw.edu.au)

### Corresponding author:

Jared Streatfeild  
Level 2, 8 Brindabella Circuit, Brindabella Business Park, Canberra Airport, ACT, 2609  
Telephone: +61 2 6263 7000  
Email: [jstreatfeild@deloitte.com.au](mailto:jstreatfeild@deloitte.com.au)

### Word count

Main text: 4,066

Tables: 4

Figures: 2

## 1 **ABSTRACT**

2 Objectives: To estimate the economic impact of delirium in the Australian population  
3 in 2016-17, including financial costs, and its burden on health.

4 Design, Setting and Participants: A cost of illness study was conducted for the  
5 Australian population in the 2016-17 financial year. The prevalence of delirium in  
6 2016-17 was calculated to inform cost estimations. The costs estimated in this study  
7 also include dementia attributable to delirium.

8 Main outcome measures: The total and per capita costs were analyzed for three  
9 categories: health systems costs, other financial costs including productivity losses  
10 and informal care, and cost associated with loss of wellbeing (burden of disease).  
11 Costs were expressed in 2016-17 pound sterling (£) and Australian dollars (AUD).

12 Results: There were more than 132,000 occurrences of delirium in 2016-17, and  
13 more than 900 deaths were attributed to delirium in 2016-17. Delirium causes an  
14 estimated 10.6% of dementia in Australia. The total costs of delirium in Australia  
15 were estimated to be £4.3 billion (AUD8.8 billion) in 2016-17, ranging between £2.6  
16 billion (AUD5.3 billion) and £5.9 billion (AUD12.1 billion). The total costs comprised  
17 financial costs of £1.7 billion and the value of healthy life lost of £2.5 billion.

18 Dementia attributable to delirium accounted for £2.2 billion of the total cost of  
19 delirium.

20 Conclusions: These findings highlight the substantial burden that delirium imposes  
21 on Australian society - both in terms of financial costs associated with health system  
22 expenditure and the increased need for residential aged care due to the functional

1  
2  
3 23 and cognitive decline associated with delirium and dementia. To reduce the  
4  
5 24 substantial wellbeing costs of delirium, further research should seek to better  
6  
7  
8 25 understand the potential pathways from an episode of delirium to subsequent  
9  
10 26 mortality and reduced cognitive functioning outcomes.  
11  
12  
13  
14 27

## 16 28 **Strengths and limitations of this study**

- 19 29 • This cost of illness study estimates the total annual financial and wellbeing  
20 30 impacts of delirium for the first time in Australia.
- 21 31 • This study also estimates the costs of dementia that are associated with delirium  
22 32 in Australia, with significant implications for other high income western  
23 33 countries.
- 24 34 • This study is based on non-systematic search strategy to find relevant cost  
25 35 inputs, noting that a number of inputs are sourced from official Australian  
26 36 Government statistics.
- 27 37 • There were a number of data gaps when estimating costs, meaning the results of  
28 38 our study are only indicative of the total cost.
- 29 39 • Cost of illness studies provide guidance on the size of the problem, but more  
30 40 work is need to identify cost effective interventions to reduce the burden of  
31 41 delirium.



## 42 INTRODUCTION

43 Delirium is a common, serious, and sometimes fatal medical condition, characterized  
44 by an acute decline in cognitive functioning.[1] The term delirium is used to describe  
45 a transient, reversible neuropsychiatric syndrome that is of acute (abrupt or sudden)  
46 onset, with a fluctuating course which often occurs in the setting of a medical  
47 condition.[2] The Diagnostic and Statistical Manual of Mental Disorders, Fifth Edition  
48 characterizes delirium as a disturbance in attention, where the disturbance develops  
49 over a short period of time and represents an acute change from baseline attention  
50 and awareness. The disturbance should not be better explained by a pre-existing  
51 disorder, and evidence is required that the disturbance is a direct physiological  
52 consequence of another medical condition, substance intoxication or withdrawal, or  
53 exposure to a toxin.[3]

54 The development of delirium has been associated with increased morbidity,  
55 persistent functional decline, higher hospital costs, higher rates of residential aged  
56 care placement and increased mortality.[2, 4, 5] It is also a significant risk factor for  
57 later onset of dementia and acceleration of cognitive decline.[4] Though  
58 underdiagnosed, it is highly prevalent in hospitalizations, particularly so for palliative  
59 care populations[6, 7]; as many as 50% of people over the age of 65 who are  
60 admitted to hospital experience delirium depending on the clinical setting.[2]  
61 Despite being preventable in more than a third of cases, a study in Sweden showed  
62 that delirium remains a common complication in hospitalized elderly patients.[8]

1  
2  
3 63 A previous study in the United States, undertaken over a decade ago, assessed the  
4  
5  
6 64 costs associated with delirium after adjusting for patient sociodemographic and  
7  
8 65 clinical characteristics and found that hospital costs per day for patients with  
9  
10 66 delirium were more than double the costs of patients who did not experience an  
11  
12  
13 67 episode of delirium.[9] Additionally, previous studies have found associations  
14  
15 68 between delirium and long-term cognitive impairment and dementia,[10] and  
16  
17 69 premature death.[3, 11] However, the relative costs of these outcomes have not yet  
18  
19  
20 70 been established.

21  
22  
23 71 To date, no studies have estimated the costs of delirium in Australia. Understanding  
24  
25  
26 72 the costs of delirium is important because delirium is often missed in as many as two  
27  
28 73 thirds of cases,[12] although there are validated tools for diagnosing delirium such as  
29  
30 74 the Confusion Assessment Method.[2] By better understanding the costs, morbidity  
31  
32  
33 75 and mortality of delirium, it is possible to answer the question of whether it would  
34  
35 76 be worthwhile to pay more attention to its prevention, diagnosis and treatment.  
36  
37  
38 77 Different costs of disease are borne by different individuals or sectors of society.  
39  
40  
41 78 Understanding how the costs are shared helps to make informed decisions regarding  
42  
43 79 interventions. The purpose of this study was to raise awareness of the impacts of  
44  
45  
46 80 delirium and contribute to improving policy in this area, by quantifying the  
47  
48 81 magnitude of the economic burden associated with delirium in Australia in 2016-17.

## 51 82 **METHODS**

52  
53  
54  
55 83 In this study, the financial costs of delirium to the Australian health system include  
56  
57 84 the costs of running hospitals and nursing homes, GP and specialist services  
58  
59  
60

1  
2  
3 85 reimbursed through Australia's universal health insurance scheme and private funds,  
4  
5  
6 86 the cost of pharmaceuticals and over-the-counter medications, allied health services,  
7  
8 87 research and health administration. The other financial costs of delirium in this study  
9  
10 88 include productivity costs, the cost of informal care, funeral costs, and deadweight  
11  
12  
13 89 losses associated with taxation payments and administration. The loss of wellbeing  
14  
15 90 due to delirium was measured using disability adjusted life years (DALYs).  
16  
17

### 18 91 **Prevalence**

19  
20  
21 92 This cost of illness study was conducted using standard methodology,[13] based on a  
22  
23 93 prevalence approach to cost measurement. Prevalence approaches measure the  
24  
25 94 number of people with a given condition in a base period and the costs associated  
26  
27 95 with treating them, as well as other financial and non-financial costs in that year due  
28  
29 96 to the condition. This approach is combined with both bottom-up and top-down  
30  
31 97 approaches to estimate expenditure for each cost component.[13] For example, a  
32  
33 98 top-down approach has been used to estimate the costs of dementia due to  
34  
35 99 delirium, while most costs of delirium have been established using a bottom-up  
36  
37 100 approach. The methodology is consistent with previously published research in this  
38  
39 101 field in Australia and internationally.[14-16] Costs were estimated from the  
40  
41 102 perspective of Australian society for the 2016-17 financial year.  
42  
43  
44  
45  
46  
47  
48

49 103 A targeted literature review was conducted to identify the prevalence of delirium in  
50  
51 104 acute hospitalizations, nursing homes and in the community (without presenting to  
52  
53 105 hospital). The targeted review was investigative in nature and considered fit-for-  
54  
55 106 purpose as the prevalence and methods vary widely across studies. The focus of the  
56  
57  
58  
59  
60

1  
2  
3 107 literature review was on prevalence in a hospital setting. For hospitalizations, studies  
4  
5 108 were included if they provided results for general medical or surgical wards (i.e. an  
6  
7  
8 109 acute setting) for the duration of the hospital stay using validated diagnostic  
9  
10  
11 110 measures. Results from the literature searches were pooled by taking a weighted  
12  
13 111 average to estimate an average prevalence that could be applied to Australian  
14  
15 112 hospital separations (Additional File 1, Table 1). Overall, the prevalence of delirium in  
16  
17 113 a hospital setting was estimated to be 20.2% on average, which was applied to the  
18  
19 114 521,099 overnight acute emergency hospital separations for people aged 70 years or  
20  
21 115 older in 2016-17.[17] Therefore, there were approximately 105,182 hospital  
22  
23 116 separations involving delirium in 2016-17, of which delirium was recorded as the  
24  
25 117 principal diagnosis for approximately 11,999 separations in 2016-17.[18]  
26  
27  
28  
29 118 Additional diagnosis separations in younger age groups (less than 70 years old) were  
30  
31 119 estimated by applying the ratio between total and principal delirium diagnoses to  
32  
33 120 principal diagnoses in the younger age groups. [17,18] We estimate there were  
34  
35 121 14,578 separations for younger Australians, and 119,760 total cases of delirium in  
36  
37 122 Australian hospitals in 2016-17.  
38  
39  
40  
41  
42  
43 123 No prevalence studies in Australian nursing homes were identified. Prevalence  
44  
45 124 results were thus derived from a study from the Netherlands,[19] due to similarities  
46  
47 125 in aged care settings, demographic profiles and medication prescribing rates – for  
48  
49 126 example, both countries exhibit high rates of psychotropic medication prescribing  
50  
51 127 (though there are some differences in the preferred antipsychotic agent),[20]  
52  
53 128 despite their limited efficacy and adverse effects in people with delirium.[7] The  
54  
55 129 combined prevalence and incidence was 8.5% and 16.9 per 100 person-years  
56  
57  
58  
59  
60

1  
2  
3 130 respectively. These rates are similar to the rates reported in other international  
4  
5  
6 131 literature.[21-23]  
7

8  
9 132 In Australia on 30 June 2015, there were 172,044 permanent residents in aged care  
10  
11 133 facilities. Using estimated population growth by age group from the Australian  
12  
13 134 Bureau of Statistics (ABS),[24] we estimate there would have been 181,314  
14  
15  
16 135 permanent residents in Australian aged care facilities on 30 June 2017. Applying the  
17  
18 136 prevalence (at baseline), and the incidence per 100 person years from Boorsma et  
19  
20  
21 137 al,[19] we estimate that 46,054 permanent residents had delirium in 2016-17.  
22

23  
24 138 The total prevalence of delirium in Australia 2016-17 was adjusted to avoid double  
25  
26 139 counting people in the residential aged care cohort who also present to hospital. The  
27  
28 140 following rates were used to adjust the prevalence to avoid double counting people  
29  
30 141 in residential aged care who also present to hospital: 50% of cases were delirious at  
31  
32 142 admission;[25] 43% of hospitalized patients were delirious at discharge;[26] 31.2%  
33  
34 143 were admitted from residential aged care while 68.9% were admitted from the  
35  
36 144 community;[27] and of people with delirium, 28% of patients were discharged to  
37  
38 145 residential aged care, 63% were discharged to the community, and 9% died before  
39  
40 146 discharge from hospital.[28]  
41  
42  
43  
44

#### 45 46 47 147 **Average duration of an episode of delirium and mortality**

48  
49 148 A targeted literature review was conducted to identify studies that reported the  
50  
51 149 average duration of delirium across hospital and residential aged care settings. The  
52  
53 150 average duration of delirium was estimated by taking a weighted average of the  
54  
55  
56  
57  
58  
59  
60

1  
2  
3 151 findings reported in twelve studies (Additional File 1, Table 2), which was 5.9 days on  
4  
5  
6 152 average.

7  
8  
9 153 Mortality associated with delirium was estimated using an attributable fraction  
10  
11 154 approach,[13] and the hazard ratio of 1.77 used in our analysis was based on a  
12  
13 155 previous systematic review and meta-analysis (Additional File 1, Table 3).[3]. The  
14  
15  
16 156 hazard ratio was used to estimate an attributable fraction for how many deaths are  
17  
18 157 due to delirium in Australia.

### 21 158 **Health care system expenditure**

22  
23  
24  
25 159 A targeted literature review was conducted to identify studies that reported cost  
26  
27 160 inputs suitable to estimate health care system expenditure. The review was  
28  
29  
30 161 considered more fit-for-purpose than a systematic review given this was a cost of  
31  
32 162 illness study where many of the inputs are in data sets and grey literature (e.g.  
33  
34 163 government documents), not in peer-reviewed literature.

35  
36  
37 164 Health system costs were estimated using a bottom-up approach. This includes costs  
38  
39  
40 165 associated with hospital, medication, and research expenditure, out of hospital  
41  
42 166 medical and other health professionals' expenditure, and residential aged care  
43  
44  
45 167 expenditure. Delirium induces functional decline, resulting in a longer length of stay  
46  
47 168 (LOS) for older people in hospital, consequently leading to higher hospitalization  
48  
49  
50 169 expenditure.[2] To estimate the additional expenditure, the prevalence of delirium  
51  
52 170 among hospitalized older people was applied to the additional LOS and the average  
53  
54  
55 171 daily cost of care in a hospital setting.

1  
2  
3 172 The average daily cost of an acute separation was obtained from the Independent  
4  
5 173 Hospital Pricing Authority (IHPA) for 2014-15 and adjusted by the standard index  
6  
7  
8 174 rate used by IHPA (2.1%) to estimate the cost for the 2016-17 base year.[29] The  
9  
10 175 average cost of any separation for 2016-17 was estimated to be £2,538, or £961 per  
11  
12 176 day in 2016-17 terms. The average daily cost was also adjusted by an additional  
13  
14 177 14.3% to inflate for non-allocated health costs (an allowance for capital costs) based  
15  
16 178 on AIHW.[30] Where delirium was a secondary diagnosis, the average daily cost was  
17  
18 179 adjusted to remove separation costs that were unlikely to be attributable to  
19  
20 180 delirium, such as costs associated with surgery. The average daily cost for an  
21  
22 181 additional separation was estimated to be £644, which was applied to hospital  
23  
24 182 prevalence as an additional diagnosis (106,098) and the additional LOS due to  
25  
26 183 delirium, which was assumed to be 2.7 days (see Additional File 1, Table 4 and  
27  
28 184 Additional File 1, Table 5). Where delirium was a primary diagnosis (13,662  
29  
30 185 separations), the cost was assumed to be the same as the delirium diagnostic  
31  
32 186 resource group, which was £4,489 in 2016-17 after updating for inflation in the  
33  
34 187 National Efficient Price.[29]  
35  
36  
37 188 To estimate health research expenditure on delirium in Australia in 2016-17, this  
38  
39 189 report utilized the National Health and Medical Research Council (NHMRC) grants  
40  
41 190 database. The database outlines all NHMRC research grant funding between 2000  
42  
43 191 and 2016 and provides a description of the projects and key outcomes achieved.[31]  
44  
45 192 Annual funding allocated to delirium research in 2016-17 was estimated by taking an  
46  
47 193 average across the historical years. Other forms of health research where research  
48  
49  
50  
51  
52  
53  
54  
55  
56  
57  
58  
59  
60

1  
2  
3 194 costs can be recovered – for example, by charging a higher price for services – were  
4  
5  
6 195 not considered in this analysis, consistent with standard methodology.[13]  
7  
8  
9 196 Out of hospital medical expenditure (GP consultations) was estimated by applying  
10  
11 197 the average cost per GP consultation (approximately £16 after adjusting for multiple  
12  
13 198 problems per GP consultation),[32] to the total services associated with organic  
14  
15  
16 199 psychoses in Australia,[33] which was considered comparable to delirium. After  
17  
18 200 adjusting for population growth, there were estimated to be 22,640 GP consultations  
19  
20  
21 201 associated with delirium in 2016-17.

22  
23  
24 202 Residential aged care expenditure was estimated using an attributable fraction  
25  
26 203 approach based on literature to estimate admissions to aged care due to cognitive  
27  
28 204 decline associated with delirium. The odds ratio for admission (2.41),[4] was  
29  
30  
31 205 converted to an attributable fraction. The number of admissions was adjusted by  
32  
33 206 average LOS in residential aged care in Australia and applied to the average costs  
34  
35  
36 207 associated with residential aged care, which was estimated to be £43,978 per person  
37  
38  
39 208 based on the total expenditure on residential aged care services in Australia.[34]

#### 40 41 42 209 **Other financial costs**

43  
44  
45 210 The economic cost of short run productivity losses associated with absenteeism  
46  
47 211 were estimated using the friction cost method.[13] Average employment rates and  
48  
49 212 average weekly earnings for people with delirium are based on ABS data for the  
50  
51  
52 213 general population by age and gender.[35, 36] Absenteeism was estimated as the  
53  
54 214 duration of delirium (5.9 days) for separations that occur in the working age  
55  
56  
57 215 population, adjusted for employment rates.



1  
2  
3 216 Carers are people who provide care to others in need of assistance or support. An  
4  
5 217 informal carer provides this service without formal payment and does so outside of  
6  
7 218 the formal care sector. On average, we estimate that each person with delirium  
8  
9 219 would have received an additional 0.9 hours of care per week, based on the change  
10  
11 220 in activities of daily living over a period of 12 months (Additional File 1 provides  
12  
13 221 supplementary information that was used to estimate the additional hours of  
14  
15 222 care).[37, 38] The dollar value of informal care was estimated as the opportunity  
16  
17 223 cost of a carer's time, which was based on general population average weekly  
18  
19 224 earnings and employment rates.[35, 36]  
20  
21 225 The additional cost of funerals borne by family and friends of people with delirium  
22  
23 226 was based on the number of deaths associated with delirium. The cost of a funeral  
24  
25 227 was assumed to be £4,602. Funeral costs were brought forward by the average life  
26  
27 228 expectancy at age of death. The deadweight losses due to lost taxation revenue  
28  
29 229 (given an assumption of no change in spending) and additional government spending  
30  
31 230 on delirium was calculated by applying the average marginal excess burden of  
32  
33 231 taxation of £0.31 per £1 of tax.[39, 40]  
34  
35  
36  
37  
38  
39  
40  
41  
42  
43

### 232 **Loss of wellbeing**

44  
45  
46 233 Burden of disease methodology was employed to quantify the impact of delirium on  
47  
48 234 wellbeing.[41] The approach is non-financial, where pain, suffering and premature  
49  
50 235 mortality are measured in terms of disability adjusted life years (DALYs). DALYs are  
51  
52 236 comprised of years of healthy life lost due to morbidity (YLDs) and years of life lost  
53  
54 237 due to premature mortality (YLLs).[41] YLDs were calculated using a prevalence  
55  
56  
57  
58  
59  
60

1  
2  
3 238 approach, whereby the disability weight was multiplied by average duration of  
4  
5 239 delirium. The disability weight for delirium used in this study was 0.17.[42] Duration  
6  
7  
8 240 of delirium was based on the prevalence of persistent delirium over 12 months.[43]  
9  
10 241 DALYs were converted to a monetary value using the value of a statistical life year  
11  
12 242 (£93,882), which is an official estimate updated for inflation using the Consumer  
13  
14 243 Price Index.[44] The value of a statistical life year was discounted at a rate of 3% per  
15  
16 244 annum where it has been applied to future years of life lost due to morality from  
17  
18 245 delirium.  
19  
20  
21  
22

#### 23 246 **Costs of dementia attributable to delirium**

24  
25  
26 247 Costs of dementia were sourced from an Australian cost of illness study.[45] Inputs  
27  
28 248 were taken for Australia in the 2016 financial year, and updated using either health  
29  
30 249 inflation or the Consumer Price Index as appropriate. The wellbeing cost attributable  
31  
32 250 to dementia for YLLs or YLDs was estimated using data from the Australian Institute  
33  
34 251 of Health and Welfare's Australian Burden of Disease Study.[46] The proportion of  
35  
36 252 dementia attributable to delirium was estimated using the population attributable  
37  
38 253 fraction approach. The odds ratio for developing a new case was 5.88 for people  
39  
40 254 aged 65-84 years old and 7.56 for people aged 85 years or older,[47-49] which was  
41  
42 255 used to estimate an attributable fraction.  
43  
44  
45  
46  
47  
48

#### 49 256 **Sensitivity analysis**

50  
51  
52 257 One-way sensitivity analyses were conducted on prevalence, the risk for mortality,  
53  
54 258 dementia admission to aged care, average hospital costs, discount rate for DALYs,  
55  
56 259 and the value of a statistical life year. The specific values represent the upper and  
57  
58  
59  
60

1  
2  
3 260 lower 95% confidence intervals for the relevant input parameters where available, or  
4  
5  
6 261 unit costs that were 25% higher or lower if the distribution was unknown.  
7  
8

### 9 262 **Currency standardization**

10  
11 263 All costs are expressed in 2016-17 pound sterling. Costs were converted from  
12  
13 264 Australian dollars using the 2017 Organisation for Economic Cooperation and  
14  
15  
16 265 Development purchasing power parity of 2.065 Australian dollars per pound sterling  
17  
18  
19 266 in 2017.[50]  
20  
21

### 22 267 **Data analysis and ethical considerations**

23  
24  
25 268 Data for this study was collected throughout January to June 2017 by the authors  
26  
27  
28 269 from a range of public data sources and literature. The data was analyzed and  
29  
30 270 compiled in Microsoft Excel. No individual patient data was collected for the study  
31  
32  
33 271 and therefore, this study did not require ethics approval.  
34  
35

### 36 272 **Patient and public involvement**

37  
38  
39 273 Patient and public were not involved in this study.  
40  
41

## 42 274 **RESULTS**

### 43 44 45 275 **Prevalence and mortality**

46  
47  
48 276 There were an estimated 132,595 cases of delirium in Australia in 2016-17,  
49  
50  
51 277 representing both cases that occur in hospital and aged care. This is equivalent to  
52  
53 278 approximately 0.5% of the population in Australia, although some individuals may  
54  
55  
56 279 experience delirium more than once in a year. Prevalence by age and gender are  
57  
58  
59 280 available in Table 1. The rates increase substantially with age.  
60

281 Table 1. Prevalence of delirium in Australia, 2016-17

| <i>Age/ gender</i> | <i>Community</i> | <i>Residential aged care</i> | <i>Total</i>   | <i>% of general population</i> |
|--------------------|------------------|------------------------------|----------------|--------------------------------|
| <b>Male</b>        |                  |                              |                |                                |
| <65                | 3,278            | 1,756                        | 5,034          | 0.05                           |
| 65-69              | 1,916            | 1,281                        | 3,197          | 0.5                            |
| 70-74              | 4,342            | 2,088                        | 6,430          | 1.4                            |
| 75-89              | 6,282            | 2,868                        | 9,149          | 2.8                            |
| 80-84              | 9,680            | 3,545                        | 13,225         | 6.3                            |
| 85+                | 18,651           | 3,263                        | 21,914         | 11.8                           |
| <i>Total</i>       | <i>44,149</i>    | <i>14,801</i>                | <i>58,949</i>  | <i>0.5</i>                     |
| <b>Female</b>      |                  |                              |                |                                |
| <65                | 4,100            | 746                          | 4,846          | 0.05                           |
| 65-69              | 1,994            | 778                          | 2,773          | 0.5                            |
| 70-74              | 4,044            | 1,523                        | 5,567          | 1.1                            |
| 75-79              | 6,224            | 2,771                        | 8,996          | 2.5                            |
| 80-84              | 9,195            | 5,270                        | 14,465         | 5.5                            |
| 85+                | 16,835           | 20,164                       | 36,999         | 11.9                           |
| <i>Total</i>       | <i>42,393</i>    | <i>31,253</i>                | <i>73,646</i>  | <i>0.6</i>                     |
| <b>Person</b>      | <b>86,541</b>    | <b>46,054</b>                | <b>132,595</b> | <b>0.5</b>                     |

282

283 The hazard ratio for mortality indicated that 12,571 people who had delirium would  
 284 die in 2016-17, and approximately 909 of these deaths were attributable to delirium  
 285 itself.

#### 286 Health care system expenditure

287 Delirium most commonly occurred in hospitals, with an estimated 119,760 cases  
 288 (some of these individuals usually reside in aged care). Total health system and aged  
 289 care costs associated with delirium in Australia were estimated to be £844.2 million  
 290 in 2016-17. The total comprised hospital (£247.3 million), residential aged care  
 291 (£596.2 million), out-of-hospital medical (£0.4 million), and research expenditure  
 292 (£0.3 million).

1  
2  
3 293 **Other financial costs**  
4  
5

6 294 Other financial costs – including absenteeism costs (£6.6 million), informal care costs  
7  
8 295 (£0.8 million), brought forward funeral costs (£0.7 million) and deadweight losses  
9  
10 296 (£188.4 million) – for people with delirium were estimated to be £196.6 million in  
11  
12 297 Australia in 2016-17. Productivity losses imposed by delirium were estimated to be  
13  
14 298 relatively small. The cost of informal care (£0.8 million) was relatively small due to  
15  
16 299 the low opportunity cost of carer time (£0.84 per hour); informal carers provided  
17  
18 300 987,958 hours of care.  
19  
20  
21  
22

23  
24 301 **Loss of wellbeing**  
25

26  
27 302 The total burden of disease from delirium in 2016-17 was estimated to be  
28  
29 303 £994.1 million. Overall, people with delirium experienced: 5,441 years of healthy life  
30  
31 304 lost due to disability (YLDs), or 0.041 YLDs per person with delirium; 5,687 years of  
32  
33 305 life lost due to premature death (YLLs), or 0.043 YLLs per person with delirium; and  
34  
35 306 11,128 DALYs overall, or around 0.084 DALYs per person with delirium in 2016-17.  
36  
37  
38  
39

40 307 **Costs of dementia attributable to delirium**  
41

42  
43 308 Overall, it was estimated that 40,981 or 10.6% cases of dementia were attributable  
44  
45 309 to delirium, which largely occur in people aged 85 years or older. The total costs of  
46  
47 310 dementia due to delirium were estimated to be £2.2 billion, of which the financial  
48  
49 311 costs were £675.7 million and the loss of wellbeing was £1.6 billion. Table 2 shows  
50  
51 312 cost breakdowns by age and gender group. Figure 1 shows the costs of dementia due  
52  
53 313 to delirium broken down by health system and aged care costs, other financial costs  
54  
55 314 and burden of disease.  
56  
57  
58  
59  
60

315 Table 2. Costs of delirium in Australia in 2016-17, by age and gender group, £ million  
316 or %

| <i>Age/<br/>gender</i> | <i>Financial cost</i> |                                     | <i>Wellbeing cost</i> |                                     | <i>Total</i>   | <i>% of<br/>total</i> |
|------------------------|-----------------------|-------------------------------------|-----------------------|-------------------------------------|----------------|-----------------------|
|                        | <i>Delirium</i>       | <i>Dementia due<br/>to delirium</i> | <i>Delirium</i>       | <i>Dementia due<br/>to delirium</i> |                |                       |
| <b>Male</b>            |                       |                                     |                       |                                     |                |                       |
| <65                    | 15.0                  | -                                   | 19.5                  | -                                   | 34.5           | 1                     |
| 65-69                  | 8.1                   | 7.9                                 | 12.6                  | 5.1                                 | 33.7           | 1                     |
| 70-74                  | 57.5                  | 22.3                                | 26.8                  | 18.2                                | 124.8          | 3                     |
| 75-89                  | 81.9                  | 48.2                                | 43.7                  | 67.6                                | 241.4          | 6                     |
| 80-84                  | 124.6                 | 67.9                                | 89.5                  | 126.3                               | 408.4          | 10                    |
| 85+                    | 233.5                 | 154.1                               | 260.6                 | 368.2                               | 1,016.3        | 24                    |
| <b>Female</b>          |                       |                                     |                       |                                     |                |                       |
| <65                    | 14.7                  | -                                   | 18.7                  | -                                   | 33.4           | 1                     |
| 65-69                  | 7.0                   | 9.8                                 | 10.8                  | 7.2                                 | 34.8           | 1                     |
| 70-74                  | 52.2                  | 14.6                                | 22.4                  | 13.8                                | 103.0          | 2                     |
| 75-79                  | 81.0                  | 47.1                                | 39.7                  | 72.2                                | 240.0          | 6                     |
| 80-84                  | 121.9                 | 71.1                                | 80.3                  | 144.0                               | 417.4          | 10                    |
| 85+                    | 243.3                 | 232.9                               | 369.4                 | 729.0                               | 1,574.6        | 37                    |
| <b>Overall</b>         | <b>1,040.8</b>        | <b>675.7</b>                        | <b>994.1</b>          | <b>1,551.6</b>                      | <b>4,262.2</b> | <b>100</b>            |
| <b>% of<br/>total</b>  | <b>24</b>             | <b>16</b>                           | <b>23</b>             | <b>36</b>                           | <b>100</b>     |                       |

317

318 (INSERT FIGURE 1)

### 319 Total costs

320 The total costs of delirium in Australia were estimated to be £4.3 billion

321 (AUD8.8 billion) in 2016-17. The total cost comprised financial costs of £1.7 billion

322 (AUD3.5 billion) and the value of healthy life lost of £2.5 billion (AUD5.3 billion).

323 Table 3 shows the costs of delirium broken down by health system and aged care

324 costs, other financial costs, and burden of disease.

325 Table 3. Costs of delirium in Australia in 2016-17, by cost component

| <i>Cost component</i>       | <i>Total (£ million)</i> | <i>Per person with delirium (£)</i> |
|-----------------------------|--------------------------|-------------------------------------|
| Health system and aged care | 1,299.9                  | 9,804                               |
| Other financial costs       | 416.6                    | 3,142                               |
| Loss of wellbeing           | 2,545.7                  | 19,199                              |
| <b>Total costs</b>          | <b>4,262.2</b>           | <b>32,145</b>                       |

326

327 **Sensitivity analysis**

328 The results and specific values for the sensitivity analysis are shown in Table 4 and

329 Figure 2. The total cost of delirium in Australia was most sensitive to changes in the

330 risk for dementia following delirium and the overall prevalence rate. The total cost of

331 delirium was estimated to range from £2.6 billion to £5.9 billion in Australia in

332 2016-17.

333 Table 4. Sensitivity analysis, £ million

| <i>Variable</i>                                          | <i>Financial</i> | <i>Loss of wellbeing</i> | <i>Total</i> |
|----------------------------------------------------------|------------------|--------------------------|--------------|
| Base case                                                | 1,716.5          | 2,545.7                  | 4,262.2      |
| Prevalence (20.2%)                                       |                  |                          |              |
| Lower (17.0%)                                            | 1,333.3          | 2,110.6                  | 3,443.9      |
| Upper (23.3%)                                            | 2,141.1          | 2,993.6                  | 5,134.7      |
| Risk for mortality (OR = 1.77)                           |                  |                          |              |
| Upper (OR = 2.15)                                        | 1,716.8          | 2,757.9                  | 4,474.8      |
| Lower (OR = 1.39)                                        | 1,716.2          | 2,316.7                  | 4,032.9      |
| Risk for dementia (OR for >65 = 5.88, OR for >85 = 7.56) |                  |                          |              |
| Upper (OR for >65 = 20.70, OR for >85 = 29.43)           | 2,191.0          | 3,678.2                  | 5,869.2      |
| Lower (OR for >65 = 1.69, OR for >85 = 1.96)             | 1,213.0          | 1,372.8                  | 2,585.8      |
| Risk for admission to aged care (OR = 2.41)              |                  |                          |              |
| Upper (OR = 3.29)                                        | 1,993.3          | 2,545.7                  | 4,539.0      |
| Lower (OR = 1.77)                                        | 1,453.8          | 2,545.7                  | 3,999.6      |
| Average hospital costs*                                  |                  |                          |              |
| Upper (+25%)                                             | 1,794.7          | 2,545.7                  | 4,340.4      |
| Lower (-25%)                                             | 1,638.4          | 2,545.7                  | 4,184.1      |
| Discount rate for DALYs (3%)                             |                  |                          |              |
| Upper (7%)                                               | 1,716.5          | 2,488.6                  | 4,205.1      |
| Lower (0%)                                               | 1,716.5          | 2,596.3                  | 4,312.9      |

334 \* hospital costs were varied for delirium only, not dementia.

335

336 (INSERT FIGURE 2)

## 337 DISCUSSION

338 This is the first cost of illness study estimating the economic impact of delirium in the  
 339 Australian population. While a number of studies have examined the financial costs  
 340 of delirium, they are generally limited to specific services or population  
 341 subgroups.[5] There have been no previous attempts to estimate the cost of delirium  
 342 taking into account both the financial and wellbeing costs, as this study has done. It



1  
2  
3 343 is critical that such economic estimations are undertaken as they inform decision  
4  
5  
6 344 making.

7  
8  
9 345 According to our findings, delirium imposes a substantial burden on society.  
10  
11 346 Considering delirium alone, the economic costs were mostly incurred by the health  
12  
13 347 and aged care systems (£844.2 million), representing close to 1.5% of total  
14  
15  
16 348 expenditure on health and aged care in Australia. As many high-income western  
17  
18 349 countries are dealing with issues of aging demographics and cognitive impairment,  
19  
20  
21 350 our findings may be generalizable to other health and aged care systems. For  
22  
23 351 example, previous research has found that delirium is associated with multiple  
24  
25  
26 352 adverse outcomes including increased length and cost of hospitalization, functional  
27  
28 353 and cognitive decline, institutionalization, and mortality.[2-5, 51] These results have  
29  
30  
31 354 significant implications for governments, who aim to identify conditions with high  
32  
33 355 social and financial costs for focused attention through public education and other  
34  
35  
36 356 initiatives that effect improvements in health status. The results of this study  
37  
38 357 highlight the need for concerted, worldwide efforts to mitigate the impacts of this  
39  
40  
41 358 clinically significant and costly medical condition.

42  
43  
44 359 According to our estimates, there were 132,595 occurrences of delirium in Australia  
45  
46 360 in 2016-17, but data from the Australian Institute of Health and Welfare National  
47  
48 361 Hospital Morbidity Database for 2015-16 indicate that as many as 1 in 5 cases are  
49  
50  
51 362 missed. This is supported by previous research which suggests that delirium is  
52  
53 363 undiagnosed in a large number of cases, ranging from approximately 25% of cases up  
54  
55  
56 364 to 87.5% in cases where dementia is also present.[12] This has significant

1  
2  
3 365 implications for clinical practice as the outcomes of delirium are serious.[1] Future  
4  
5 366 research could focus on techniques to improve the detection rate.  
6  
7

8  
9 367 Dementia represents a significant cost to the economy of all countries; the cost of  
10  
11 368 dementia due to delirium is therefore an important cost component of delirium. It  
12  
13 369 has been estimated that 47 million people are living with dementia globally, with  
14  
15 370 costs of £583 billion; moreover, prevalence is expected to triple over the next three  
16  
17 371 decades.[52] Overall, the costs of dementia attributable to delirium more than  
18  
19 372 doubled the total costs of delirium in Australia in 2016-17. We found that  
20  
21 373 approximately 10.6% of dementia cases, and thus costs, are associated with  
22  
23 374 delirium. Therefore, delirium imposes a large cost burden on residential aged care,  
24  
25 375 due to the high prevalence of dementia and the strong relationships between  
26  
27 376 cognitive impairment and aged care. There may be considerable opportunities to  
28  
29 377 prevent some of the worldwide burden of dementia and improve the fiscal  
30  
31 378 sustainability of health systems in the face of aging populations.  
32  
33  
34  
35  
36  
37

38  
39 379 Care for delirium following discharge from hospital relies heavily on informal carers,  
40  
41 380 who provided almost 1 million hours of care to people with delirium. As workforce  
42  
43 381 participation increases and the propensity to care declines,[53] there is a risk that  
44  
45 382 the care needs of people with delirium will either go unmet, or require additional  
46  
47 383 government funding for aged care to meet their needs.  
48  
49  
50

51 384 There are some limitations to this study. First, the methods outlined the use of a  
52  
53 385 non-systematic search strategy, noting that this was fit-for-purpose when a number  
54  
55 386 of inputs were derived from official Australian Government statistics. The estimates  
56  
57  
58  
59  
60

1  
2  
3 387 presented should be interpreted with this in mind. Second, limited studies were  
4  
5  
6 388 found with appropriate methods to robustly estimate the prevalence of delirium in  
7  
8 389 Australian hospital settings, but also in community or residential aged care settings.  
9  
10 390 In order to minimize the impact of this limitation and the risk of double counting  
11  
12  
13 391 across studies, our analysis focused on delirium which met the full diagnostic criteria.  
14  
15 392 Similarly, data paucity in some areas, such as out-of-hospital medical costs and  
16  
17  
18 393 productivity losses (employment outcomes) means that total estimates may be  
19  
20 394 conservative. Given the methodology, the costs of delirium presented in this paper  
21  
22  
23 395 should be treated as an estimate only. More research, including observational  
24  
25 396 studies in Australian settings, is required to understand the true costs incurred by  
26  
27  
28 397 people with delirium. However, a study that can capture costs across the health  
29  
30 398 system and aged care settings in Australia will be technically challenging and may  
31  
32  
33 399 not be feasible due to the fragmented nature of the systems and data collection –  
34  
35 400 particularly beyond the point at which people interact with the system. Finally, cost  
36  
37  
38 401 of illness studies provide guidance on the size of the problem, but are only useful for  
39  
40 402 informing cost effective options for change when compared to the cost of such  
41  
42  
43 403 interventions. More work is needed to identify cost effective options to reduce the  
44  
45 404 burden of delirium in Australia.

## 48 405 **CONCLUSION**

50  
51 406 In summary, delirium imposes a substantial burden on Australian society – both in  
52  
53  
54 407 terms of financial costs associated with health system expenditure and a greater  
55  
56  
57 408 need for residential aged care due to the functional and cognitive decline associated  
58  
59  
60

1  
2  
3 409 with delirium and dementia. The financial costs of delirium were largely borne by  
4  
5  
6 410 Australian governments due to the health system and aged care expenditure.  
7  
8  
9 411 Further research should seek to understand the causes, treatment and prognosis of  
10  
11 412 delirium, especially with regard to potential pathways from an episode of delirium to  
12  
13 413 subsequent mortality outcomes and reduced cognitive functioning. Improving  
14  
15  
16 414 mortality outcomes and reducing decline in cognitive functioning would help to  
17  
18  
19 415 reduce the substantial financial and wellbeing costs of delirium.  
20

## 21 416 **ACKNOWLEDGEMENTS**

### 22 417 **Author contributions:**

23  
24  
25  
26  
27  
28 418 LP, JS and GC conceived of and designed the study. JS, JH and LP collated the data,  
29  
30 419 performed the data analysis and contributed to interpretation and reporting of the  
31  
32  
33 420 data. AT, MA and GC contributed to the interpretation and reporting of the data. All  
34  
35  
36 421 authors read, commented on and approved the final manuscript, and all authors  
37  
38 422 reviewed the manuscript for important intellectual content. The sponsor was not  
39  
40  
41 423 directly involved in the findings of the research.  
42

### 43 424 **Conflicts of interest**

44  
45  
46 425 The authors declare that they have no competing interests.  
47  
48

### 49 426 **Funding sources**

50  
51  
52 427 The research was supported by the Australasian Delirium Association.  
53  
54

### 55 428 **Data sharing statement**

56  
57  
58  
59  
60

1  
2  
3 429 No additional data are available.  
4  
5

6 430 **FIGURE LEGENDS**  
7  
8

9  
10 431 Figure 1 Costs of delirium and dementia due to delirium in Australia in 2016-17, £  
11  
12 432 million.  
13  
14

15 433 Figure 2 Sensitivity analysis (tornado diagram) showing the impact of key parameter  
16  
17 434 inputs on the total cost of delirium in Australia in 2016 17.  
18  
19  
20  
21  
22  
23  
24  
25  
26  
27  
28  
29  
30  
31  
32  
33  
34  
35  
36  
37  
38  
39  
40  
41  
42  
43  
44  
45  
46  
47  
48  
49  
50  
51  
52  
53  
54  
55  
56  
57  
58  
59  
60

## REFERENCES

1. Caplan GA, Kurrle S, Cumming A. Appropriate care for older people with cognitive impairment in hospital. *Med J Aust.* 2016;205(10):S12-S15. doi: 10.5694/mja15.00898 [published online first: 21 Nov 2016].
2. Inouye S, Westendorp R, Sacynski J. Delirium in elderly people. *Lancet.* 2014;383:911-922.
3. American Psychiatric Association. Diagnostic and statistical manual of mental disorders (DSM-5®). American Psychiatric Pub; 2013 May 22.
4. Witlox J, Eurelings LS, de Jonghe JF, et al. Delirium in elderly patients and the risk of postdischarge mortality, institutionalization, and dementia: a meta-analysis. *JAMA.* 2010;304(4):443-451.
5. Leslie D, Inouye S. The importance of delirium: economic and societal costs. *J Am Geriatr Soc.* 2011;59(2):241-243.
6. Siddiqi N, House AO, Holmes JD. Occurrence and outcome of delirium in medical in-patients: a systematic literature review. *Age Ageing.* 2006;35:350-364.
7. Mittal V, Sunanda M, Williamson D, et al. Delirium in the elderly: A comprehensive review. *Am J Alzheimers Dis Other Demen.* 2011;26(2):97-109.

- 1  
2  
3 8. Johansson YA, Bergh I, Ericsson I, Sarenmalm EK. Delirium in older  
4 hospitalized patients—signs and actions: a retrospective patient record  
5 review. *BMC Geriatrics*. 2018;18(1):43.  
6  
7
- 8  
9  
10  
11 9. Leslie D, Marcantonio ER, Zhang Y et al. One-year health care costs associated  
12 with delirium in the elderly population. *Arch Intern Med*. 2008;168(1):27-32.  
13  
14
- 15  
16  
17 10. Pandharipande PP, Girard TD, Jackson JC, et al. Long-term cognitive  
18 impairment after critical illness. *N Engl J Med*. 2013;369(14):1306-1316.  
19  
20
- 21  
22  
23 11. Leslie DL, Zhang Y, Holford TR et al. Premature death associated with delirium  
24 at 1-year follow-up. *Arch Intern Med*. 2005;165:1657-1662.  
25  
26
- 27  
28  
29 12. Speed G, Wynaden D, McGowan S, et al. Prevalence rate of delirium at two  
30 hospitals in Western Australia. *Aust J Adv Nurs*. 2007;25(1):38-43.  
31  
32
- 33  
34  
35 13. Segel JE. Cost-of-illness studies- A primer. RTI-UNC Center of Excellence in  
36 Health Promotion Economics. 2006. Available from:  
37  
38 [https://www.rti.org/sites/default/files/resources/COI\\_Primer.pdf](https://www.rti.org/sites/default/files/resources/COI_Primer.pdf) (accessed  
39  
40  
41  
42  
43  
44  
45  
46  
47  
48  
49  
50  
51  
52  
53  
54  
55  
56  
57  
58  
59  
60  
online first: 4 Jun 2017).
14. Pezzullo L, Streatfeild J, Simkiss P, Shickle D. The economic impact of sight  
loss and blindness in the UK adult population. *BMC Health Serv Res*.  
2018;18:63.
15. Hillman D, Mitchell S, Streatfeild J, et al. The economic cost of inadequate  
sleep. *Sleep*. 2018;41(8):zsy083. doi.org/10.1093/sleep/zsy083 [published  
online first: 4 Jun 2018].

- 1  
2  
3 16. Taylor HR, Pezzullo ML, Keeffe JE. The economic impact and cost of visual  
4  
5  
6  
7  
8  
9  
10  
11  
12  
13  
14  
15  
16  
17  
18  
19  
20  
21  
22  
23  
24  
25  
26  
27  
28  
29  
30  
31  
32  
33  
34  
35  
36  
37  
38  
39  
40  
41  
42  
43  
44  
45  
46  
47  
48  
49  
50  
51  
52  
53  
54  
55  
56  
57  
58  
59  
60  
impairment in Australia. *Br J Ophthalmol*. 2006;90:272-5.
17. Australian Institute of Health and Welfare (AIHW). Admitted patient care  
2014-15, Australian hospital statistics, Health services series no. 68, cat. no.  
HSE 172, Canberra: AIHW. 2016.
18. Australian Institute of Health and Welfare (AIHW). Principal diagnosis data  
cubes. Retrieved from [http://www.aihw.gov.au/hospitals-data/principal-  
diagnosis-data-cubes/](http://www.aihw.gov.au/hospitals-data/principal-diagnosis-data-cubes/). 2017.
19. Boorsma M, Joling KJ, Frijters DH, et al. The prevalence, incidence and risk  
factors for delirium in Dutch nursing homes and residential care homes.  
*Intern J Geriatr Psychiatry*. 2011; 27(7): 709-715.
20. Taxis K, Kochen S, Wouters H, et al. Cross-national comparison of medication  
use in Australian and Dutch nursing homes. *Age ageing*. 2016;46(2):320-3.  
doi:10.1093/ageing/afw218 [published online first: 14 Dec 2016].
21. McCusker J, Cole MG, Voyer P, et al. Prevalence and incidence of delirium in  
long-term care. *Int J Geriatr Psychiatry*. 2011; 26(11): 1152-1161.
22. Dosa D, Intrator O, McNicoll L, et al. Preliminary derivation of a nursing home  
confusion assessment method based on data from the minimum data set. *J  
Am Geriatr Soc*. 2007; 55(7): 1099-1105.



- 1  
2  
3 23. Kiely, DK, Bergmann, MA, Murphy KM, et al. Delirium among newly admitted  
4 postacute facility patients: prevalence, symptoms, and severity. *J Gerontol A*  
5 *Biol Sci Med Sci.* 2003; 58(5): M441-M445.  
6  
7  
8  
9  
10  
11 24. Australian Bureau of Statistics. Population projections, Australia, 2012 (base)  
12 to 2101 [Internet]. 2013 [cited 2017 Dec 11]; ABS, cat. no. 3222.0. Available  
13 from: <http://www.abs.gov.au/ausstats/abs@.nsf/mf/3222.0>.  
14  
15  
16  
17  
18  
19 25. Barron EA, Holmes J. Delirium within the emergency care setting, occurrence  
20 and detection: a systematic review. *Emerg Med J.* 2013; 30(4): 263-268.  
21  
22  
23  
24  
25 26. McAvay GJ, Van Ness PH, Bogardus ST, et al. Older adults discharged from the  
26 hospital with delirium: 1-year outcomes. *J Am Geriatr Soc.* 2006; 54(8): 1245-  
27 1250.  
28  
29  
30  
31  
32  
33 27. Travers C, Byrne G, Pachana N, et al. Prospective observational study of  
34 dementia and delirium in the acute hospital setting. *Intern Med J.* 2013;  
35 43(3): 262-269.  
36  
37  
38  
39  
40  
41 28. Inouye, SK, Rushing JT, Foreman MD, et al. Does delirium contribute to poor  
42 hospital outcomes? *J Gen Intern Med.* 1998; 13(4): 234-242.  
43  
44  
45  
46  
47  
48 29. Independent Hospital Pricing Authority (IHPA). National Hospital Cost Data  
49 Collection, Public Hospitals Cost Report, Round 19 (Financial Year 2014-15)  
50 [Internet]. 2017 Mar 2 [cited 2017 Dec 13]. Available from  
51 [https://www.ihoa.gov.au/publications/national-hospital-cost-data-collection-](https://www.ihoa.gov.au/publications/national-hospital-cost-data-collection-public-hospitals-cost-report-round-19-financial)  
52 [public-hospitals-cost-report-round-19-financial](https://www.ihoa.gov.au/publications/national-hospital-cost-data-collection-public-hospitals-cost-report-round-19-financial).  
53  
54  
55  
56  
57  
58  
59  
60

- 1  
2  
3 30. Australian Institute of Health and Welfare (AIHW). 2004 May 11. Health  
4 system expenditure on disease and injury in Australia 2000-01, cat. no. HWE  
5 26 [Internet]. 2004 May 11 [cited 2017 Dec 13]. Available from  
6 [https://www.aihw.gov.au/reports/health-welfare-expenditure/health-](https://www.aihw.gov.au/reports/health-welfare-expenditure/health-system-expenditure-on-disease-and-injury-in/contents/table-of-contents)  
7 [system-expenditure-on-disease-and-injury-in/contents/table-of-contents.](https://www.aihw.gov.au/reports/health-welfare-expenditure/health-system-expenditure-on-disease-and-injury-in/contents/table-of-contents)  
8  
9  
10  
11  
12  
13  
14  
15  
16 31. National Health and Medical Research Council. Research Funding Statistics  
17 and Data: All Grants 2000-2016. 2017. Available from:  
18 [https://www.nhmrc.gov.au/grants-funding/research-funding-statistics-and-](https://www.nhmrc.gov.au/grants-funding/research-funding-statistics-and-data)  
19 [data \(accessed 6 Dec 2017\).](https://www.nhmrc.gov.au/grants-funding/research-funding-statistics-and-data)  
20  
21  
22  
23  
24  
25  
26  
27 32. Department of Health. Annual Medicare Statistics – Financial Year 1984-85 to  
28 2015-16. 2016. Available from: <http://www.health.gov.au/medicarestats>  
29  [\(accessed 6 Dec 2017\).](http://www.health.gov.au/medicarestats)  
30  
31  
32  
33  
34  
35 33. Charles J, Miller G, Ng A. Management of psychosis in Australian general  
36 practice. *Aust Fam Physician*. 2006;35(3):88.  
37  
38  
39  
40  
41 34. Aged Care Financing Authority. Fourth Report on the Funding and Financing  
42 of the Aged Care Industry [Internet]. 2016 [cited 2017 Dec 11]. Available from  
43 [https://agedcare.health.gov.au/2016-report-on-the-funding-and-financing-](https://agedcare.health.gov.au/2016-report-on-the-funding-and-financing-of-the-aged-care-industry)  
44 [of-the-aged-care-industry.](https://agedcare.health.gov.au/2016-report-on-the-funding-and-financing-of-the-aged-care-industry)  
45  
46  
47  
48  
49  
50  
51  
52 35. Australian Bureau of Statistics. Labour Force, Australia, Jun 2016, Cat. No.  
53 6202.0 [Internet]. 2016 Jul 14 [cited 2017 Dec 11]. Available from:  
54 [http://www.abs.gov.au/AUSSTATS/abs@.nsf/DetailsPage/6202.0Jun%20201](http://www.abs.gov.au/AUSSTATS/abs@.nsf/DetailsPage/6202.0Jun%202016?OpenDocument)  
55 [6?OpenDocument.](http://www.abs.gov.au/AUSSTATS/abs@.nsf/DetailsPage/6202.0Jun%202016?OpenDocument)  
56  
57  
58  
59  
60

- 1  
2  
3 36. Australian Bureau of Statistics. Average Weekly Earnings, Australia, May  
4  
5 2017, Cat. No. 6302.0 [Internet]. 2017 Aug 17 [cited 2017 Dec 11]. Available  
6  
7 from:  
8  
9  
10 <http://www.abs.gov.au/AUSSTATS/abs@.nsf/Lookup/6302.0Main+Features1>  
11  
12 <http://www.abs.gov.au/AUSSTATS/abs@.nsf/Lookup/6302.0Main+Features1>  
13 [May%202017?OpenDocument](http://www.abs.gov.au/AUSSTATS/abs@.nsf/Lookup/6302.0Main+Features1).  
14  
15  
16 37. Vida S, du Fort GG, Kakuma R, et al. An 18-month prospective cohort study of  
17  
18 functional outcome of delirium in elderly patients: activities of daily living. *Int*  
19  
20 *Psychogeriatr*. 2006 Dec;18(4):681-700.  
21  
22  
23  
24 38. Murray AM, Levkoff SE, Wetle TT, et al. Acute delirium and functional decline  
25  
26 in the hospitalized elderly patient. *J Gerontol*. 1993 Sep 1;48(5):M181-M186.  
27  
28  
29  
30 39. KPMG Econtech. (2010). CGE analysis of the current Australian tax system,  
31  
32 Report for the Australian Government. 2010. Available from:  
33  
34 [http://www.taxreview.treasury.gov.au/content/html/commissioned\\_work/d](http://www.taxreview.treasury.gov.au/content/html/commissioned_work/downloads/KPMG_Econtech_Efficiency%20of%20Taxes_Final_Report.pdf)  
35  
36 [ownloads/KPMG\\_Econtech\\_Efficiency%20of%20Taxes\\_Final\\_Report.pdf](http://www.taxreview.treasury.gov.au/content/html/commissioned_work/downloads/KPMG_Econtech_Efficiency%20of%20Taxes_Final_Report.pdf)  
37  
38 (accessed 6 Dec 2017).  
39  
40  
41  
42  
43 40. Cao L, Hosking A, Kouparitsas M, et al. Understanding the economy-wide  
44  
45 efficiency and incidence of major Australian taxes. 2015. Available from:  
46  
47 <http://www.apo.org.au/system/files/54294/apo-nid54294-99131.docx>  
48  
49 (accessed 6 Dec 2017).  
50  
51  
52  
53  
54 41. Murray C, Lopez A. The Global Burden of Disease: a comprehensive  
55  
56 assessment of mortality & disability from diseases, injuries & risk factors in  
57  
58  
59  
60

1  
2  
3 1990 & projected to 2020, Volume 1, Global Burden of Disease & Injury  
4  
5 Series, Harvard: Harvard School of Public Health. 1996  
6  
7

8  
9 42. Stouthard, ME, Essink-Bot, ML, Bonsel GJ, et al. Disability weights for diseases  
10  
11 in the Netherlands. Rotterdam, The Netherlands: Department of Public  
12  
13 Health, Erasmus University; 1997.  
14

15  
16  
17 43. Cole MG, Ciampi A, Belzile E, et al. Persistent delirium in older hospital  
18  
19 patients: a systematic review of frequency and prognosis. Age Ageing.  
20  
21 2009;28(1):19-26.  
22  
23

24  
25  
26 44. Department of Prime Minister and Cabinet. Best practice regulation guidance  
27  
28 note: Value of statistical life. 2014. Available from:  
29  
30 [https://www.pmc.gov.au/sites/default/files/publications/Value\\_of\\_Statistical](https://www.pmc.gov.au/sites/default/files/publications/Value_of_Statistical_Life_guidance_note.pdf)  
31  
32 [\\_Life\\_guidance\\_note.pdf](https://www.pmc.gov.au/sites/default/files/publications/Value_of_Statistical_Life_guidance_note.pdf) (accessed 11 Dec 2017).  
33  
34

35  
36 45. Brown L, Hansnata E, La, HA. Economic Cost of Dementia in Australia. 2017.  
37  
38 Available from:  
39  
40 [https://staff.dementia.org.au/files/NATIONAL/documents/The-economic-](https://staff.dementia.org.au/files/NATIONAL/documents/The-economic-cost-of-dementia-in-Australia-2016-to-2056.pdf)  
41  
42 [cost-of-dementia-in-Australia-2016-to-2056.pdf](https://staff.dementia.org.au/files/NATIONAL/documents/The-economic-cost-of-dementia-in-Australia-2016-to-2056.pdf) (accessed 6 Dec 2017).  
43  
44  
45

46  
47 46. Australian Institute of Health and Welfare. Australian burden of disease  
48  
49 study: Impacts and causes of illness and death in Australia 2011. 2016; AIHW  
50  
51 Australian burden of disease study series no. 3. BOD 4. Available from:  
52  
53 [https://www.aihw.gov.au/getmedia/d4df9251-c4b6-452f-a877-](https://www.aihw.gov.au/getmedia/d4df9251-c4b6-452f-a877-8370b6124219/19663.pdf.aspx?inline=true)  
54  
55 [8370b6124219/19663.pdf.aspx?inline=true](https://www.aihw.gov.au/getmedia/d4df9251-c4b6-452f-a877-8370b6124219/19663.pdf.aspx?inline=true) (accessed 6 Dec 2017).  
56  
57  
58  
59  
60

- 1  
2  
3 47. Lundström M, Edlund A, Bucht G, et al. Dementia after delirium in patients  
4  
5 with femoral neck fractures. *J Am Geriatr Soc*. 2003 Jul 1;51(7):1002-1006.  
6  
7  
8
- 9 48. Davis DH, Muniz Terrera G, Keage H, et al. Delirium is a strong risk factor for  
10  
11 dementia in the oldest-old: a population-based cohort study. *Brain*. 2012 Aug  
12  
13 9;135(9):2809-2816.  
14  
15  
16
- 17 49. Rockwood KE, Cosway S, Carver D, et al. The risk of dementia and death after  
18  
19 delirium. *Age Ageing*. 1999 Oct 1;28(6):551-556.  
20  
21  
22
- 23 50. Organisation for Economic Cooperation and Development. Purchasing power  
24  
25 parities (PPP). 2018; Available from:  
26  
27 <https://data.oecd.org/conversion/purchasing-power-parities-ppp.htm>  
28  
29 (accessed 15 June 2018).  
30  
31  
32
- 33 51. Dasgupta M, Hillier L. Factors associated with prolonged delirium: a  
34  
35 systematic review. *Int Psychogeriatr*. 2010;22(3):373-394.  
36  
37  
38
- 39 52. Livingston G, Sommerlad A, Orgeta V, et al. Dementia prevention,  
40  
41 intervention, and care. *Lancet*. 2017;390(10113):2673-734.  
42  
43 [dx.doi.org/10.1016/S0140-6736\(17\)31363-6](https://doi.org/10.1016/S0140-6736(17)31363-6) [published online first: 20 Jul  
44  
45 2017].  
46  
47  
48
- 49 53. Deloitte Access Economics. The economic value of informal care in Australia  
50  
51 in 2015, 2015 Jun; Available from:  
52  
53 [http://www.carersaustralia.com.au/storage/Access%20Economics%20Report](http://www.carersaustralia.com.au/storage/Access%20Economics%20Report.pdf)  
54  
55 .pdf (accessed 20 Dec 2017).  
56  
57  
58  
59  
60

1  
2  
3  
4  
5  
6  
7  
8  
9  
10  
11  
12  
13  
14  
15  
16  
17  
18  
19  
20  
21  
22  
23  
24  
25  
26  
27  
28  
29  
30  
31  
32  
33  
34  
35  
36  
37  
38  
39  
40  
41  
42  
43  
44  
45  
46  
47  
48  
49  
50  
51  
52  
53  
54  
55  
56  
57  
58  
59  
60

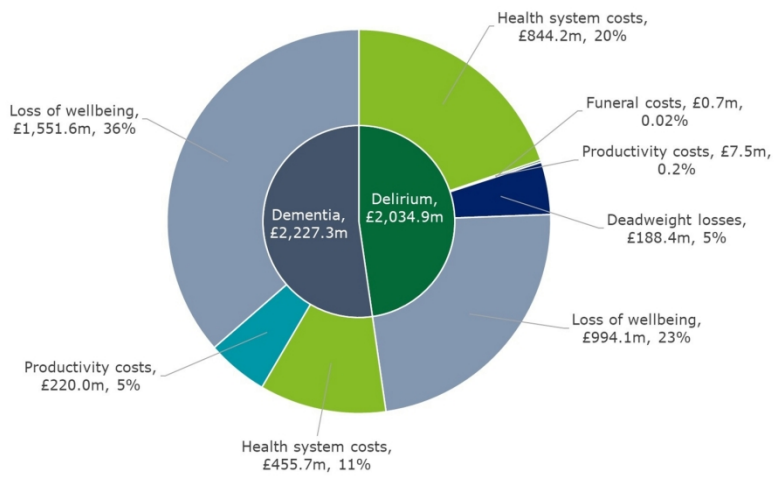

Figure 1 Costs of delirium and dementia due to delirium in Australia in 2016-17, £ million

174x90mm (300 x 300 DPI)

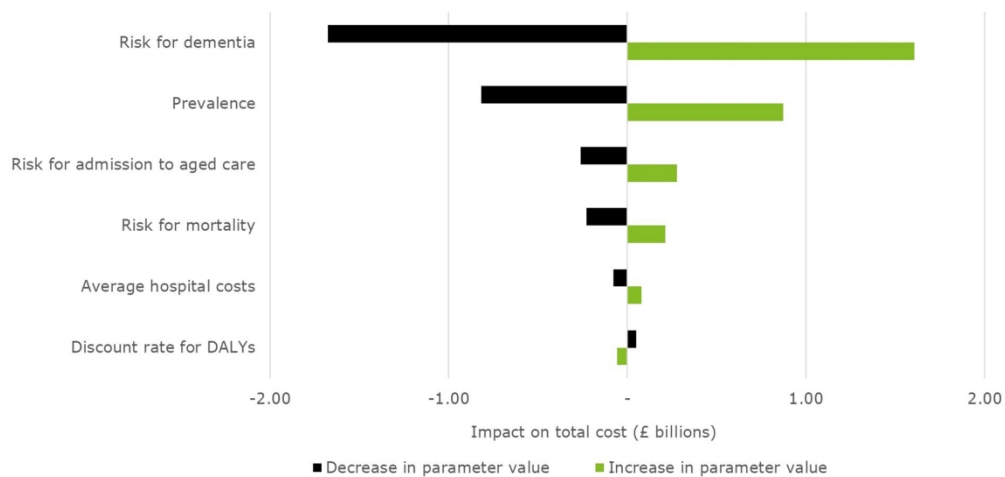

Figure 2 Sensitivity analysis (tornado diagram) showing the impact of key parameter inputs on the total cost of delirium in Australia in 2016-17

180x90mm (300 x 300 DPI)

## The economic impact of delirium in Australia in 2016-17: a cost of illness study

**Additional File 1. Supplementary methods**

|   |   |          |                                                     |    |
|---|---|----------|-----------------------------------------------------|----|
| 1 | 1 | <b>1</b> | <b>CHEERS checklist</b> .....                       | 2  |
| 2 | 2 | <b>2</b> | <b>Literature review strategy</b> .....             | 4  |
| 3 | 3 | <b>3</b> | <b>Epidemiology</b> .....                           | 5  |
| 4 | 4 | 3.1      | Prevalence in episodes of acute hospital care ..... | 5  |
| 5 | 5 | 3.2      | Duration of delirium episodes.....                  | 6  |
| 6 | 6 | 3.3      | Mortality associated with delirium .....            | 7  |
| 7 | 7 | <b>4</b> | <b>Hospital expenditure</b> .....                   | 9  |
| 8 | 8 | <b>5</b> | <b>Informal care costs</b> .....                    | 11 |
| 9 | 9 | <b>6</b> | <b>References</b> .....                             | 12 |

For peer review only



## The economic impact of delirium in Australia in 2016-17: a cost of illness study

## 10 1 CHEERS checklist

## 11 CHEERS checklist

| Section/item                                           | Item No | Recommendation                                                                                                                                                                                                                                                                                                              | Reported on page No/line No                                  |
|--------------------------------------------------------|---------|-----------------------------------------------------------------------------------------------------------------------------------------------------------------------------------------------------------------------------------------------------------------------------------------------------------------------------|--------------------------------------------------------------|
| <b>Title and abstract</b>                              |         |                                                                                                                                                                                                                                                                                                                             |                                                              |
| Title                                                  | 1       | Identify the study as an economic evaluation or use more specific terms such as “cost-effectiveness analysis”, and describe the interventions compared.                                                                                                                                                                     | Page 1, line 3.                                              |
| Abstract                                               | 2       | Provide a structured summary of objectives, perspective, setting, methods (including study design and inputs), results (including base case and uncertainty analyses), and conclusions.                                                                                                                                     | Page 2, line 1-26.                                           |
| <b>Introduction</b>                                    |         |                                                                                                                                                                                                                                                                                                                             |                                                              |
| Background and objectives                              | 3       | Provide an explicit statement of the broader context for the study.                                                                                                                                                                                                                                                         | Page 4, line 43-76.                                          |
|                                                        |         | Present the study question and its relevance for health policy or practice decisions.                                                                                                                                                                                                                                       | Page 5, line 77-81.                                          |
| <b>Methods</b>                                         |         |                                                                                                                                                                                                                                                                                                                             |                                                              |
| Target population and subgroups                        | 4       | Describe characteristics of the base case population and subgroups analysed, including why they were chosen.                                                                                                                                                                                                                | Page 6, line 103-105.                                        |
| Setting and location                                   | 5       | State relevant aspects of the system(s) in which the decision(s) need(s) to be made.                                                                                                                                                                                                                                        | Page 5, line 83-90.                                          |
| Study perspective                                      | 6       | Describe the perspective of the study and relate this to the costs being evaluated.                                                                                                                                                                                                                                         | Page 6, line 101-102.                                        |
| Comparators                                            | 7       | Describe the interventions or strategies being compared and state why they were chosen.                                                                                                                                                                                                                                     | Not applicable. No interventions or strategies are compared. |
| Time horizon                                           | 8       | State the time horizon(s) over which costs and consequences are being evaluated and say why appropriate.                                                                                                                                                                                                                    | Page 6, line 102.                                            |
| Discount rate                                          | 9       | Report the choice of discount rate(s) used for costs and outcomes and say why appropriate.                                                                                                                                                                                                                                  | Page 12, line 243-245.                                       |
| Choice of health outcomes                              | 10      | Describe what outcomes were used as the measure(s) of benefit in the evaluation and their relevance for the type of analysis performed.                                                                                                                                                                                     | Page 5, line 83-90.                                          |
| Measurement of effectiveness                           | 11a     | <i>Single study-based estimates:</i> Describe fully the design features of the single effectiveness study and why the single study was a sufficient source of clinical effectiveness data.                                                                                                                                  | Not applicable. No interventions are considered.             |
|                                                        | 11b     | <i>Synthesis-based estimates:</i> Describe fully the methods used for identification of included studies and synthesis of clinical effectiveness data.                                                                                                                                                                      | Not applicable. No interventions are considered.             |
| Measurement and valuation of preference based outcomes | 12      | If applicable, describe the population and methods used to elicit preferences for outcomes.                                                                                                                                                                                                                                 | Not applicable. No interventions are considered.             |
| Estimating resources and costs                         | 13a     | <i>Single study-based economic evaluation:</i> Describe approaches used to estimate resource use associated with the alternative interventions. Describe primary or secondary research methods for valuing each resource item in terms of its unit cost. Describe any adjustments made to approximate to opportunity costs. | Page 9, line 158-245.                                        |
|                                                        | 13b     | <i>Model-based economic evaluation:</i> Describe approaches and data sources used to estimate resource use associated with model health states. Describe primary or secondary research methods for valuing each resource item in terms of its unit cost. Describe any adjustments made to approximate to opportunity costs. | Not applicable.                                              |

## The economic impact of delirium in Australia in 2016-17: a cost of illness study

| Section/item                                                         | Item No | Recommendation                                                                                                                                                                                                                                                                                                                                        | Reported on page No/line No                                               |
|----------------------------------------------------------------------|---------|-------------------------------------------------------------------------------------------------------------------------------------------------------------------------------------------------------------------------------------------------------------------------------------------------------------------------------------------------------|---------------------------------------------------------------------------|
| Currency, price date, and conversion                                 | 14      | Report the dates of the estimated resource quantities and unit costs. Describe methods for adjusting estimated unit costs to the year of reported costs if necessary. Describe methods for converting costs into a common currency base and the exchange rate.                                                                                        | Page 7, line 172-208.<br>Page 12, line 240-243.<br>Page 13, line 263-266. |
| Choice of model                                                      | 15      | Describe and give reasons for the specific type of decision-analytical model used. Providing a figure to show model structure is strongly recommended.                                                                                                                                                                                                | Not applicable for cost of illness studies.                               |
| Assumptions                                                          | 16      | Describe all structural or other assumptions underpinning the decision-analytical model.                                                                                                                                                                                                                                                              | Not applicable for cost of illness studies.                               |
| Analytical methods                                                   | 17      | Describe all analytical methods supporting the evaluation. This could include methods for dealing with skewed, missing, or censored data; extrapolation methods; methods for pooling data; approaches to validate or make adjustments (such as half cycle corrections) to a model; and methods for handling population heterogeneity and uncertainty. | Page 5, line 82-266.                                                      |
| <b>Results</b>                                                       |         |                                                                                                                                                                                                                                                                                                                                                       |                                                                           |
| Study parameters                                                     | 18      | Report the values, ranges, references, and, if used, probability distributions for all parameters. Report reasons or sources for distributions used to represent uncertainty where appropriate. Providing a table to show the input values is strongly recommended.                                                                                   | Page 5, line 82-266.                                                      |
| Incremental costs and outcomes                                       | 19      | For each intervention, report mean values for the main categories of estimated costs and outcomes of interest, as well as mean differences between the comparator groups. If applicable, report incremental cost-effectiveness ratios.                                                                                                                | Not applicable for cost of illness studies.                               |
| Characterising uncertainty                                           | 20a     | <i>Single study-based economic evaluation:</i> Describe the effects of sampling uncertainty for the estimated incremental cost and incremental effectiveness parameters, together with the impact of methodological assumptions (such as discount rate, study perspective).                                                                           | Page 18, line 327-336.                                                    |
|                                                                      | 20b     | <i>Model-based economic evaluation:</i> Describe the effects on the results of uncertainty for all input parameters, and uncertainty related to the structure of the model and assumptions.                                                                                                                                                           | Not applicable for cost of illness studies.                               |
| Characterising heterogeneity                                         | 21      | If applicable, report differences in costs, outcomes, or cost-effectiveness that can be explained by variations between subgroups of patients with different baseline characteristics or other observed variability in effects that are not reducible by more information.                                                                            | Not applicable.                                                           |
| <b>Discussion</b>                                                    |         |                                                                                                                                                                                                                                                                                                                                                       |                                                                           |
| Study findings, limitations, generalisability, and current knowledge | 22      | Summarise key study findings and describe how they support the conclusions reached. Discuss limitations and the generalisability of the findings and how the findings fit with current knowledge.                                                                                                                                                     | Page 19, line 337-383.                                                    |
| <b>Other</b>                                                         |         |                                                                                                                                                                                                                                                                                                                                                       |                                                                           |
| Source of funding                                                    | 23      | Describe how the study was funded and the role of the funder in the identification, design, conduct, and reporting of the analysis. Describe other non-monetary sources of support.                                                                                                                                                                   | Page 23, line 426.                                                        |
| Conflicts of interest                                                | 24      | Describe any potential for conflict of interest of study contributors in accordance with journal policy. In the absence of a journal policy, we recommend authors comply with International Committee of Medical Journal Editors recommendations.                                                                                                     | Page 23, line 424.                                                        |

## The economic impact of delirium in Australia in 2016-17: a cost of illness study

12 **2 Literature review strategy**

13 A targeted rather than systematic literature review was performed to identify relevant articles with  
14 the purpose of identifying the prevalence of delirium within hospital settings and in residential aged  
15 care facilities, the duration of delirium, and mortality due to delirium. The review also identified  
16 literature relevant to costs of delirium, including health system, productivity, and wellbeing impacts.  
17 Keywords were restricted to the title and abstract for searches conducted on PubMed.

- 18 1. ("delirium"[tiab] OR "cognitive impairment"[tiab] OR "acute confusion"[tiab]) AND Meta-  
19 Analysis[ptyp].
- 20 2. ("delirium"[tiab] OR "cognitive impairment"[tiab] OR "acute confusion"[tiab]) AND  
21 "Australia"[pl].
- 22 3. ("epidemiology"[MH] OR "mortality"[MH] OR "incidence"[MH] OR "prevalence"[MH] OR  
23 "duration"[tiab] OR "persistence"[tiab]) AND ("delirium"[tiab] OR "cognitive  
24 impairment"[tiab] OR "acute confusion"[tiab])).
- 25 4. 3 AND "Australia"[pl].
- 26 5. 3 AND "Australia"[pl] AND ("hospital"[tiab] OR "aged care"[tiab] OR "nursing home"[tiab]).
- 27 6. ("cost"[tiab] OR "economic"[tiab] OR "productivity"[tiab] OR "workforce"[tiab] OR "health  
28 use"[tiab] OR "utilization"[tiab]) AND ("delirium"[tiab] OR "cognitive impairment"[tiab] OR  
29 "acute confusion"[tiab]).
- 30 7. 5 and "Australia"[pl].
- 31 8. ("burden"[tiab] OR "disability"[tiab] OR "death"[tiab] OR "quality of life"[tiab]) AND  
32 ("delirium"[tiab] OR "cognitive impairment"[tiab] OR "acute confusion"[tiab]).
- 33 9. 7 AND "Australia"[pl].

## The economic impact of delirium in Australia in 2016-17: a cost of illness study

34 **3 Epidemiology**

35 A targeted rather than systematic literature review was performed to identify relevant articles with  
 36 the purpose of identifying the prevalence of delirium within hospital settings and in residential aged  
 37 care facilities, the duration of delirium, and mortality due to delirium.

38 **3.1 Prevalence in episodes of acute hospital care**

39 Results from the literature search were pooled to estimate an average prevalence that can be  
 40 applied to Australian hospital separations<sup>a</sup>. The studies, characteristics and pooled results are shown  
 41 in Table 1. Studies were pooled using weights based on the sample size.

42 **Table 1: Occurrence rates of delirium**

| Author, year                                      | Country     | Sample restrictions                     | Sample size | Mean age (SD) | Assessment frequency                                              | Occurrence/prevalence (%) |
|---------------------------------------------------|-------------|-----------------------------------------|-------------|---------------|-------------------------------------------------------------------|---------------------------|
| <b>Sources cited in Siddiqi et al<sup>1</sup></b> |             |                                         |             |               |                                                                   |                           |
| Braekhus 1994                                     | Norway      | > 75 years                              | 58          | 83.1          | Every 3 days                                                      | 24.1                      |
| Cameron 1987                                      | US          | No age restriction                      | 133         | 68.8          | On request                                                        | 15.0                      |
| Feldman 1999                                      | Israel      | >70 years, admissions to geriatric unit | 61          | 83.2 (6.8)    | Every 2 days for 14 days, intermittently until discharge or death | 18.0                      |
| Jitapunkul 1992                                   | UK          | Admissions to geriatric unit            | 184         | 81.7 (6.6)    | At admission, 1 week, discharge and case record review            | 21.7                      |
| Johnson 1990                                      | US          | >70 years                               | 235         | 78 (6.0)      | Within 24 hours and every day                                     | 20.4                      |
| O'Keefe 1996                                      | Ireland     | No age restriction                      | 225         | 82 (4.0)      | Within 24 hours and every 2 days                                  | 41.8                      |
| Rockwood 1989                                     | Canada      | Elderly                                 | 80          | 76.8          | Daily                                                             | 25.0                      |
| Rockwood 1993                                     | Canada      | Admissions to geriatric unit            | 168         | 79 (8.0)      | At admission, timing not clear                                    | 25.6                      |
| Seymour 1980                                      | Canada      | >70 years                               | 68          | 81.2          | Within 4 hours, weekly                                            | 16.2                      |
| Zanocchi 1998                                     | Italy       | Admissions to geriatric unit            | 585         | 77.1          | Twice-daily                                                       | 22.2                      |
| Total/weighted average                            |             |                                         | 1,797       | 80.3 (4.4)    |                                                                   | 24.0                      |
| <b>Recent point-prevalence/occurrence studies</b> |             |                                         |             |               |                                                                   |                           |
| McAvay, 2006 <sup>2</sup>                         | US          | >70 years                               | 433         | 79.8 (6.3)    | Daily                                                             | 12.7                      |
| Holden, 2008 <sup>3</sup>                         | New Zealand | >65 years                               | 216         | 79.3          | Every 2 days until discharge                                      | 29.1                      |

<sup>a</sup> Three studies from Siddiqi et al<sup>1</sup> were removed from the analysis. Two of the studies were restricted to a sample of patients who were admitted from community dwellings,<sup>4,5</sup> while one study was removed because there were insufficient details to assess the methods were appropriate as the full text article was not available in English.<sup>2</sup>

The economic impact of delirium in Australia in 2016-17: a cost of illness study

| Author, year                | Country   | Sample restrictions                      | Sample size  | Mean age (SD)     | Assessment frequency                                 | Occurrence/prevalence (%) |
|-----------------------------|-----------|------------------------------------------|--------------|-------------------|------------------------------------------------------|---------------------------|
| McCusker, 2003 <sup>6</sup> | Canada    | >65 years                                | 1,552        | 83.6 (7.4)        | -                                                    | 22.3                      |
| Inouye, 1998 <sup>7</sup>   | US        | >65 years, medical and surgical patients | 107          | -                 | Admission and discharge                              | 25.0                      |
| Jones, 2006 <sup>8</sup>    | US        | >70 years                                | 491          | 79.0 (6.0)        | Daily                                                | 22.0                      |
| Inouye, 1998 <sup>7</sup>   | US        | >65 years, medical and surgical patients | 174          | -                 | Admission and discharge                              | 15.0                      |
| Ryan 2013 <sup>9</sup>      | Ireland   | Adults, no restriction                   | 280          |                   | Point prevalence                                     | 17.6                      |
| Bellelli 2016 <sup>10</sup> | Italy     | >65 years                                | 1,867        | 82 (7.4)          | Point prevalence                                     | 22.9                      |
| Meagher 2014 <sup>11</sup>  | Ireland   | Adults, no restriction                   | 311          | 76 (13.1)         | Point prevalence                                     | 16.7                      |
| Iseki 2007 <sup>12</sup>    | Australia | >65 years                                | 104          | 80.1 (7.0)        | At admission, follow up at 2-3 days, and then weekly | 21.0                      |
| Travers 2013 <sup>13</sup>  | Australia | >70 years                                | 493          | 80.4 (6.5)        | Daily                                                | 17.3                      |
| Speed 2007 <sup>14</sup>    | Australia | Adults, no restriction                   | 1,209        | 80.0              | Four point prevalence audits                         | 10.9                      |
| Total/weighted average      |           |                                          | 7,237        | 81.1 (7.4)        |                                                      | 19.2                      |
| <b>Overall</b>              |           |                                          | <b>9,034</b> | <b>80.9 (6.6)</b> |                                                      | <b>20.2</b>               |

Source: Based on Siddiqi et al<sup>1</sup> and sources as itemised in the table. Weighted averages are based on sample size.

### 3.2 Duration of delirium episodes

As delirium is a transient condition, it is important to estimate the average duration of an episode of delirium to calculate the burden imposed on society (Table 2).

Table 2: Duration of delirium

| Author, year                         | Country     | Sample restrictions                                                                                              | Sample size  | Age (SD)   | Duration (days) |
|--------------------------------------|-------------|------------------------------------------------------------------------------------------------------------------|--------------|------------|-----------------|
| Adamis, 2006 <sup>15</sup>           | England     | Elderly care unit; ≥70 years                                                                                     | 94           | 82.8 (6.5) | 8.6             |
| Andrew, 2005 <sup>16</sup>           | Canada      | Admissions to geriatric unit                                                                                     | 77           | 78.5 (7.2) | 6.3             |
| O’Keeffe, 1997 <sup>17</sup>         | Ireland     | Admissions to geriatric unit                                                                                     | 94           | 83.2 (6.8) | 7.0             |
| Pandharipande, 2013 <sup>18</sup>    | US          | Admissions to intensive care unit (ICU) with defined list of conditions; excluded those with recent ICU exposure | 606          | 61         | 4.0             |
| Rockwood, 1993 <sup>19</sup>         | Canada      | Admissions to geriatric unit, mostly admitted from community                                                     | 173          | 79 (8)     | 8.0             |
| Van den Boogaard, 2012 <sup>20</sup> | Netherlands | Admissions to ICU; excluded those admitted for < 1 day                                                           | 272          | 81.7 (6.6) | 2.0             |
| Cole, 2012 <sup>21</sup>             | Canada      | Long-term care residents                                                                                         | 279          | 87.4       | 11.3            |
| <b>Total/weighted average</b>        |             |                                                                                                                  | <b>1,595</b> |            | <b>5.9</b>      |

Source: sources as itemised in the table. The weighted averages were based on sample size.

## The economic impact of delirium in Australia in 2016-17: a cost of illness study

### 3.3 Mortality associated with delirium

Delirium is associated with higher rates of mortality in hospital settings, and a greater chance of mortality occurring in the year following an episode of delirium. Mortality was estimated using an attributable fraction approach based on literature. Witlox et al<sup>22</sup> reported an overall average mortality rate of 38.0% compared to a rate of 27.5% with no delirium, which was a 1.4-fold increase for those with delirium. The hazard ratio – indicating how much more likely someone with delirium is to have died at any point in time – was estimated to be 1.95. The authors included seven studies from the US, UK, Canada, Chile and Brazil. To estimate mortality associated with delirium for Australia, the Chilean and Brazilian studies have been excluded from the analysis as they are demographically less similar to Australia and there may be alternative drivers of mortality in those countries. The hazard ratio was re-estimated by meta-analysis using a random effects model. The final reweighted hazard ratio was estimated to be 1.77 (Table 3).

**Table 3: Mortality rates and hazard ratio for mortality**

| Author, year (as cited in Witlox et al <sup>22</sup> ) | Country | Subgroup         | Hazard ratio for mortality (95% confidence interval) |
|--------------------------------------------------------|---------|------------------|------------------------------------------------------|
| Gonzalez et al 2009                                    | Chile   | General medical  | 4.04 (2.19 – 7.46)                                   |
| Furlaneto and Garcez-Leme 2007                         | Brazil  | Femoral fracture | 1.28 (0.66 – 2.48)                                   |
| Leslie et al 2005                                      | US      | General medical  | 1.62 (1.13 – 2.33)                                   |
| McCusker et al, 2002                                   | Canada  | General medical  | 2.16 (1.06 – 4.41)                                   |
| Nightingale et al, 2001                                | UK      | Hip fracture     | 2.40 (1.66 – 3.48)                                   |
| Rockwood et al, 1999                                   | Canada  | General medical  | 1.80 (1.11 – 2.92)                                   |
| Francis and Kapoor, 1992                               | US      | General medical  | 1.40 (0.79 – 2.48)                                   |
| <b>Pooled estimate</b>                                 |         |                  | <b>1.95 (1.51 – 2.52)</b>                            |
| <b>Reweighted estimate</b>                             |         |                  | <b>1.77 (1.39 – 2.15)</b>                            |

Source: Based on Witlox et al<sup>22</sup>

The hazard ratio (1.77) based on data from Witlox et al<sup>22</sup> was applied to general population mortality rates, including the 1.4-fold increase for mortality for people who had delirium, for the respective age groups to estimate the number of deaths associated with delirium in 2016-17. It was expected that 12,571 people who had delirium would die in 2016-17, noting not all mortality is due to delirium itself (e.g. comorbid dementia or other illness may contribute to both delirium and death). Deaths

## The economic impact of delirium in Australia in 2016-17: a cost of illness study

1  
2  
3 68 due to delirium were estimated by applying the population attributable fraction to total deaths in  
4  
5 69 the delirium cohort in 2016-17.<sup>b</sup>  
6  
7  
8  
9  
10  
11  
12  
13  
14  
15  
16  
17  
18  
19  
20  
21  
22  
23  
24  
25  
26  
27  
28  
29  
30  
31  
32  
33  
34  
35  
36  
37  
38  
39  
40  
41  
42  
43  
44  
45  
46  
47  
48  
49  
50  
51  
52  
53  
54  
55  
56  
57

---

<sup>b</sup> The formula to estimate the number of deaths attributable to delirium is as follows:

$Population\ attributable\ fraction = \frac{P.(HR-1)}{P.(HR-1)+1}$ , where P equals the prevalence rate for each age group, and HR equals the hazard ratio. The population attributable fraction is then multiplied by the total number of deaths that occur in people with delirium.

## The economic impact of delirium in Australia in 2016-17: a cost of illness study

70 **4 Hospital expenditure**

71 Hospital expenditure data in Australia includes general public and private hospital admissions. The  
72 literature shows that delirium results in functional decline, resulting in a longer length of stay (LOS)  
73 for hospital patients, consequently leading to higher hospitalisation expenditure.

74 To establish the incremental change in LOS for hospital patients with delirium, a targeted review of  
75 the relevant literature was conducted for studies that are demographically similar to Australia and  
76 that assessed outcomes for patients admitted to general medical wards.

77 The results of these studies were weighted by sample size to estimate the additional LOS for people  
78 with delirium. On average, the LOS for people with delirium was estimated to be 24.2 days rather  
79 than 16.7 days in the control groups, a difference of 7.5 days (Table 4). Additional studies were used  
80 to estimate the proportion of additional days that are due to delirium after controlling for  
81 confounding factors. When additional factors are controlled for, including the baseline  
82 characteristics of patients, delirium accounts for 36% of the additional days, as shown in Table 5. As  
83 such, we estimate that delirium increases the average LOS by 2.7 days.



## The economic impact of delirium in Australia in 2016-17: a cost of illness study

84 Table 4: Additional LOS associated with delirium

| Author, year                    | Country     | Sample characteristics                        | Sample size  | Difference in LOS |
|---------------------------------|-------------|-----------------------------------------------|--------------|-------------------|
| Alexander, 2016 <sup>23</sup>   | UK          | Admissions to general hospital                | 590          | 6.0               |
| Emond, 2017 <sup>24</sup>       | Canada      | Admissions to ICU; ≥ 65 years                 | 200          | 8.6               |
| Gaudet, 1993 <sup>25</sup>      | France      | Admissions to geriatric unit                  | 487          | 18.0              |
| Jitapunkul, 1992 <sup>26</sup>  | UK          | Admissions to acute geriatric ward; ≥60 years | 184          | 4.0               |
| Kolbeinsson, 1993 <sup>27</sup> | Iceland     | Admissions to emergency ward; ≥70 years       | 272          | 2.9               |
| McCusker, 2003 <sup>28</sup>    | Canada      | Acute care; ≥65 years                         | 359          | 3.6               |
| O'Keeffe, 1997 <sup>17</sup>    | Ireland     | Admissions to geriatric unit                  | 225          | 10.0              |
| Ramsay, 1991 <sup>29</sup>      | UK          | Admissions to acute geriatric ward            | 119          | -1.9              |
| Rockwood, 1993 <sup>19</sup>    | Canada      | Admissions to geriatric unit                  | 173          | 4.0               |
| Stevens, 1998 <sup>30</sup>     | Australia   | Admissions to general medical                 | 84           | 12                |
| Tan, 2015 <sup>31</sup>         | New Zealand | >65 years                                     | 250          | 3.8               |
| Thomas, 1988 <sup>32</sup>      | US          | Admissions to general medical ward            | 133          | 11.0              |
| <b>Total / weighted average</b> |             |                                               | <b>3,076</b> | <b>7.5</b>        |

85 Source: as itemised in table.

86 Table 5: Adjusted and unadjusted difference in LOS due to delirium

| Author, year                    | Country | Sample characteristics        | Sample size  | Unadjusted difference | Adjusted difference | Relativity  |
|---------------------------------|---------|-------------------------------|--------------|-----------------------|---------------------|-------------|
| Emond, 2017 <sup>24</sup>       | Canada  | Admissions to ICU; ≥ 65 years | 200          | 8.6                   | 8.4                 | 0.98        |
| Inouye, 1998 <sup>7</sup>       | US      | ≥65 years                     | 727          | 1.2                   | 0.5                 | 0.42        |
| McCusker, 2003 <sup>28</sup>    | Canada  | Acute care; ≥65 years         | 359          | 4.5                   | 0.5                 | 0.10        |
| O'Keeffe, 1997 <sup>17</sup>    | Ireland | Admissions to geriatric unit  | 225          | 10.0                  | 0.7                 | 0.07        |
| <b>Total / weighted average</b> |         |                               | <b>1,511</b> | <b>4.3</b>            | <b>1.5</b>          | <b>0.36</b> |

87 Source: as itemised in table.

## The economic impact of delirium in Australia in 2016-17: a cost of illness study

88 **5 Informal care costs**

89 Carers are people who provide care to others in need of assistance or support. An informal carer  
90 provides this service without formal payment and does so outside of the formal care sector. An  
91 informal carer will typically be a family member or friend of the person receiving care, and usually  
92 lives in the same household as the recipient of care.

93 Bellelli et al<sup>33</sup> found that 26.2% of patients who developed delirium during their hospital stay  
94 required assistance from paid caregivers following discharge. The rate of paid caregiving was  
95 assumed to be comparable to informal care in Australia as the care is usually provided by family  
96 members. In order to estimate the number of care recipients for Australia, 26.2% was applied to the  
97 prevalence of delirium for people who are 65 years or older and who live in the community (total  
98 adjusted prevalence – prevalence in aged care). Therefore, it was estimated that 20,741 people  
99 would require care due to delirium in Australia in 2016-17. People with delirium required assistance  
100 with an additional 0.36 activities of daily living over a period of 12 months.<sup>34,35</sup>

101 Analysis of the Survey of Disability, Ageing and Carers,<sup>36</sup> revealed an almost linear trend, such that  
102 an additional 2.57 hours of care were provided per week for each additional activity on average.<sup>c</sup> As  
103 such, each person would receive 0.9 additional hours of care per week or 47.6 hours of care  
104 throughout the year.

105 The carer's opportunity cost of time was calculated based on the weighted average weekly  
106 earnings<sup>37</sup> and the chance of being employed.<sup>38</sup>

---

<sup>c</sup> Care needs would likely depend on the type of activity for which help is required; however there was insufficient evidence to determine which activities are most influenced by delirium.

## The economic impact of delirium in Australia in 2016-17: a cost of illness study

**6 References**

1. Siddiqi N, House AO, Holmes JD. Occurrence and outcome of delirium in medical in-patients: a systematic literature review. *Age and ageing*. 2006; 35(4): 350-364.
2. McAvay GJ, Van Ness PH, Bogardus ST, et al. Older adults discharged from the hospital with delirium: 1-year outcomes. *J Am Geriatr Soc*. 2006; 54(8): 1245-1250.
3. Holden J, Jayathissa S, Young G. Delirium among elderly general medical patients in a New Zealand hospital. *Intern Med*. 2008; 38(8): 629-634.
4. Bourdel-Marchasson I, Vincent S, Germain, C, et al. Delirium symptoms and low dietary intake in older inpatients are independent predictors of institutionalization: a 1-year prospective population-based study. *J Gerontol A Biol Sci Med Sci*. 2004; 59(4): M350-M354.
5. Francis J, Kapoor WN. Delirium in hospitalized elderly. *J Gen Intern Med*. 1990; 5(1): 65-79.
6. McCusker J, Cole MG, Voyer P, et al. Prevalence and incidence of delirium in long-term care. *Int J Geriatr Psychiatry*. 2011; 26(11): 1152-1161.
7. Inouye, SK, Rushing JT, Foreman MD, et al. Does delirium contribute to poor hospital outcomes? *J Gen Intern Med*. 1998; 13(4): 234-242.
8. Jones RN, Yang FM, Zhang Y, et al. Does educational attainment contribute to risk for delirium? A potential role for cognitive reserve. *J Gerontol A Biol Sci Med Sci*. 2006; 61(12): 1307-1311.
9. Ryan DJ, O'Regan NA, Caoimh RÓ, et al. Delirium in an adult acute hospital population: predictors, prevalence and detection. *BMJ Open*. 2013; 3(1): e001772, doi: 10.1136/bmjopen-2012-001772.
10. Bellelli G, Morandi A, Di Santo SG, et al. "Delirium Day": a nationwide point prevalence study of delirium in older hospitalized patients using an easy standardized diagnostic tool. *BMC Med*. 2016; 14(1): 106-117.
11. Meagher D, O'Regan N, Ryan D, et al. Frequency of delirium and subsyndromal delirium in an adult acute hospital population. *Br J Psychiatry*. 2014; 205(6): 478-485.
12. Iseli RK, Brand C, Telford M, et al. Delirium in elderly general medical inpatients: a prospective study. *Intern Med J*. 2007; 37(12): 806-811.
13. Travers C, Byrne G, Pachana N, et al. Prospective observational study of dementia and delirium in the acute hospital setting. *Intern Med J*. 2013; 43(3): 262-269.
14. Speed G, Wynaden D, McGowan S, et al. Prevalence rate of delirium at two hospitals in Western Australia. *Aust J Adv Nurs*. 2007; 25(1): 38-43.
15. Adamis D, Treloar A, Martin FC, et al. Recovery and outcome of delirium in elderly medical inpatients. *Arch Gerontol Geriatr*. 2006; 43: 289-298.

## The economic impact of delirium in Australia in 2016-17: a cost of illness study

16. Andrew, MK, Freter SH, Rockwood, K. Incomplete functional recovery after delirium in elderly people: a prospective cohort study. *BMC Geriatr.* 2005; 5(1): 5.
17. O'Keeffe S, Lavan J. The prognostic significance of delirium in older hospital patients. *J Am Geriatr Soc.* 1997; 45(2): 174-178.
18. Pandharipande PP, Girard TD, Jackson JC, et al. Long-term cognitive impairment after critical illness. *N Engl J Med.* 2013; 369(14): 1306-1316.
19. Rockwood K. The occurrence and duration of symptoms in elderly patients with delirium. *J Gerontol.* 1993; 48(4)L: M162-M166.
20. van den Boogaard M, Schoonhoven L, Evers AW, et al. Delirium in critically ill patients: impact on long-term health-related quality of life and cognitive functioning. *Crit Care Med.* 2012; 40(1): 112-118.
21. Cole MG, McCusker J, Voyer P, et al. The course of delirium in older long-term care residents. *Intern J Geriatric Psychiatry.* 2012; 27(12): 1291-1297.
22. Witlox J, Eurelings LS, de Jonghe JF, et al. Delirium in elderly patients and the risk of postdischarge mortality, institutionalization, and dementia: a meta-analysis. *Jama.* 2010; 304(4): 443-451.
23. Alexander K, Adamson J, Cunningham C, et al. The effect of delirium and dementia on length of stay (LOS) and functional recovery of patients in elderly medical wards. *Physiotherapy.* 2016; 102: e180-e181.
24. Émond M, Grenier D, Morin J, et al. Emergency department stay associated delirium in older patients. *Can Geriatr J.* 2017; 20(1): 10.
25. Gaudet MP, Pfitzenmeyer B, Tavernier-Vidal, et al. Les états confusionnels en milieu interniste gériatrique court séjour. *Psychol Méd.* 1993; 25(7): 611-614.
26. Jitapunkul S, Pillay I, Ebrahim S. Delirium in newly admitted elderly patients: a prospective study. *QJM: Intern J Med.* 1992; 83(1): 307-314.
27. Kolbeinsson H, Jonsson A. Delirium and dementia in acute medical admissions of elderly patients in Iceland. *Acta Psychiatr Scand.* 1993; 87(2): 123-127.
28. McCusker J, Cole, MG, Dendukuri N, et al. Does delirium increase hospital stay? *J Am Geriatr Soc.* 2003; 51(11): 1539-1546.
29. Ramsay R, Wright P, Katz A, et al. The detection of psychiatric morbidity and its effects on outcome in acute elderly medical admissions. *Intern J Geriatr Psychiatry.* 1991; 6(12): 861-866.
30. Stevens LE, de Moore GM, Simpson JM. Delirium in hospital: does it increase length of stay?. *Aust N Z J Psychiatry.* 1998 Dec;32(6):805-808.
31. Tan AH, Scott J. Association of point prevalence diagnosis of delirium on length of stay, 6-month mortality, and level of care on discharge at Waitemata District Health Board, Auckland. *N Z Med J.* 2015 Mar;128(1411):68-76.

## The economic impact of delirium in Australia in 2016-17: a cost of illness study

- 1  
2  
3  
4  
5  
6  
7  
8  
9  
10  
11  
12  
13  
14  
15  
16  
17  
18  
19  
20  
21  
22  
23  
24  
25  
26  
27  
28  
29  
30  
31  
32  
33  
34  
35  
36  
37  
38  
39  
40  
41  
42  
43  
44  
45  
46  
47  
48  
49  
50  
51  
52  
53  
54  
55  
56  
57  
58  
59  
60
32. Thomas RI, Cameron DJ, Fahs MC. A prospective study of delirium and prolonged hospital stay: exploratory study. *Arch Gen Psychiatry*. 1988 Oct 1;45(10):937-940.
  33. Bellelli G, Bianchetti A, Trabucchi M. Delirium and costs of informal home care. *Arch Int Med*. 2008 Aug 11;168(15):1717.
  34. Vida S, du Fort GG, Kakuma R, et al. An 18-month prospective cohort study of functional outcome of delirium in elderly patients: activities of daily living. *Int Psychogeriatr*. 2006 Dec;18(4):681-700.
  35. Murray AM, Levkoff SE, Wetle TT, et al. Acute delirium and functional decline in the hospitalized elderly patient. *J Gerontol*. 1993 Sep 1;48(5):M181-M186.
  36. Australian Bureau of Statistics. Microdata: Disability, Ageing and Carers, Australia, 2015, Cat. No. 4430.0.30.002 [Internet]. 2016 Oct 18 [cited 2017 Dec 11]. Available from: <http://www.abs.gov.au/AUSSTATS/abs@.nsf/Lookup/4430.0.30.002Main+Features12015>.
  37. Australian Bureau of Statistics. Labour Force, Australia, Jun 2016, Cat. No. 6202.0 [Internet]. 2016 Jul 14 [cited 2017 Dec 11]. Available from: <http://www.abs.gov.au/AUSSTATS/abs@.nsf/DetailsPage/6202.0Jun%202016?OpenDocument>.
  38. Australian Bureau of Statistics. Average Weekly Earnings, Australia, May 2017, Cat. No. 6302.0 [Internet]. 2017 Aug 17 [cited 2017 Dec 11]. Available from: <http://www.abs.gov.au/AUSSTATS/abs@.nsf/Lookup/6302.0Main+Features1May%202017?OpenDocument>.

# BMJ Open

## The economic impact of delirium in Australia: a cost of illness study

|                                 |                                                                                                                                                                                                                                                                                                                                                                                                                                       |
|---------------------------------|---------------------------------------------------------------------------------------------------------------------------------------------------------------------------------------------------------------------------------------------------------------------------------------------------------------------------------------------------------------------------------------------------------------------------------------|
| Journal:                        | <i>BMJ Open</i>                                                                                                                                                                                                                                                                                                                                                                                                                       |
| Manuscript ID                   | bmjopen-2018-027514.R2                                                                                                                                                                                                                                                                                                                                                                                                                |
| Article Type:                   | Research                                                                                                                                                                                                                                                                                                                                                                                                                              |
| Date Submitted by the Author:   | 26-Jul-2019                                                                                                                                                                                                                                                                                                                                                                                                                           |
| Complete List of Authors:       | Pezzullo, Lynne; Deloitte Access Economics<br>Streatfeild, Jared; Deloitte Access Economics,<br>Hickson, Josiah; Deloitte Access Economics<br>Teodorczuk, Andrew; Griffith University, School of Medicine<br>Agar, Meera ; University of Technology Sydney, Improving Palliative,<br>Aged and Chronic Care through Clinical Research and Translation<br>Caplan, Gideon; Prince of Wales Hospital, Department of Geriatric<br>Medicine |
| <b>Primary Subject Heading</b>: | Health economics                                                                                                                                                                                                                                                                                                                                                                                                                      |
| Secondary Subject Heading:      | Geriatric medicine, Health services research, Epidemiology                                                                                                                                                                                                                                                                                                                                                                            |
| Keywords:                       | HEALTH ECONOMICS, Delirium & cognitive disorders < PSYCHIATRY,<br>Dementia < NEUROLOGY                                                                                                                                                                                                                                                                                                                                                |
|                                 |                                                                                                                                                                                                                                                                                                                                                                                                                                       |

SCHOLARONE™  
Manuscripts

## The economic impact of delirium in Australia: a cost of illness study

Authors: Lynne Pezzullo<sup>1</sup>, Jared Streatfeild<sup>1</sup>, Josiah Hickson<sup>1</sup>, Andrew Teodorczuk<sup>2</sup>, Meera Agar<sup>3</sup>, and Gideon Caplan<sup>4,5</sup>

### Author affiliations:

1. Deloitte Access Economics Pty Ltd, Canberra, Australian Capital Territory, Australia
2. Department of School and Medicine, Griffith University, Gold Coast Campus, Queensland, Australia.
3. Improving Palliative, Aged and Chronic Care Through Clinical Research and Translation, University of Technology Sydney, Ultimo, New South Wales, Australia
4. Department of Geriatric Medicine, Prince of Wales Hospital, Sydney, New South Wales, Australia
5. Prince of Wales Clinical School, University of New South Wales, Sydney, New South Wales, Australia.

### Author emails:

Lynne Pezzullo – [lpezzullo@deloitte.com.au](mailto:lpezzullo@deloitte.com.au), Jared Streatfeild – [jstreatfeild@deloitte.com.au](mailto:jstreatfeild@deloitte.com.au), Josiah Hickson – [jhickson@deloitte.com.au](mailto:jhickson@deloitte.com.au), Andrew Teodorczuk - [a.teodorczuk@griffith.edu.au](mailto:a.teodorczuk@griffith.edu.au), Meera Agar – [meera.agar@uts.edu.au](mailto:meera.agar@uts.edu.au), Gideon Caplan – [g.caplan@unsw.edu.au](mailto:g.caplan@unsw.edu.au)

### Corresponding author:

Jared Streatfeild  
Level 2, 8 Brindabella Circuit, Brindabella Business Park, Canberra Airport, ACT, 2609  
Telephone: +61 2 6263 7000  
Email: [jstreatfeild@deloitte.com.au](mailto:jstreatfeild@deloitte.com.au)

### Word count

Main text: 4,370

Tables: 4

Figures: 2

## 1 **ABSTRACT**

2 Objectives: To estimate the economic impact of delirium in the Australian population  
3 in 2016-17, including financial costs, and its burden on health.

4 Design, Setting and Participants: A cost of illness study was conducted for the  
5 Australian population in the 2016-17 financial year. The prevalence of delirium in  
6 2016-17 was calculated to inform cost estimations. The costs estimated in this study  
7 also include dementia attributable to delirium.

8 Main outcome measures: The total and per capita costs were analyzed for three  
9 categories: health systems costs, other financial costs including productivity losses  
10 and informal care, and cost associated with loss of wellbeing (burden of disease).  
11 Costs were expressed in 2016-17 pound sterling (£) and Australian dollars (AUD).

12 Results: There were an estimated 132,000 occurrences of delirium in 2016-17, and  
13 more than 900 deaths were attributed to delirium in 2016-17. Delirium causes an  
14 estimated 10.6% of dementia in Australia. The total costs of delirium in Australia  
15 were estimated to be £4.3 billion (AUD8.8 billion) in 2016-17, ranging between £2.6  
16 billion (AUD5.3 billion) and £5.9 billion (AUD12.1 billion). The total estimated costs  
17 comprised financial costs of £1.7 billion and the value of healthy life lost of £2.5  
18 billion. Dementia attributable to delirium accounted for £2.2 billion of the total cost  
19 of delirium.

20 Conclusions: These findings highlight the substantial burden that delirium imposes  
21 on Australian society - both in terms of financial costs associated with health system  
22 expenditure and the increased need for residential aged care due to the functional



1  
2  
3 23 and cognitive decline associated with delirium and dementia. To reduce the  
4  
5 24 substantial wellbeing costs of delirium, further research should seek to better  
6  
7  
8 25 understand the potential pathways from an episode of delirium to subsequent  
9  
10 26 mortality and reduced cognitive functioning outcomes.  
11  
12  
13  
14 27

## 16 28 **Strengths and limitations of this study**

- 19 29 • This cost of illness study estimates the total annual financial and wellbeing  
20 30 impacts of delirium for the first time in Australia.
- 21 31 • This study also estimates the costs of dementia that are associated with delirium  
22 32 in Australia, with significant implications for other high income western  
23 33 countries.
- 24 34 • This study is based on a non-systematic search strategy to find relevant cost  
25 35 inputs, noting that a number of inputs are sourced from official Australian  
26 36 Government statistics.
- 27 37 • There were a number of data gaps when estimating costs, meaning the results of  
28 38 this study are only indicative of the total cost.
- 29 39 • While this cost of illness study estimates the overall cost of delirium, more work  
30 40 is needed to identify cost effective interventions to reduce the burden of  
31 41 delirium.

## 42 INTRODUCTION

43 Delirium is a common, serious, and sometimes fatal medical condition, characterized  
44 by an acute decline in cognitive functioning.[1] The term delirium is used to describe  
45 a transient, reversible neuropsychiatric syndrome that is of acute (abrupt or sudden)  
46 onset, with a fluctuating course which often occurs in the setting of a medical  
47 condition.[2] The Diagnostic and Statistical Manual of Mental Disorders, Fifth Edition  
48 characterizes delirium as a disturbance in attention, where the disturbance develops  
49 over a short period of time and represents an acute change from baseline attention  
50 and awareness. The disturbance should not be better explained by a pre-existing  
51 disorder, and evidence is required that the disturbance is a direct physiological  
52 consequence of another medical condition, substance intoxication or withdrawal, or  
53 exposure to a toxin.[3]

54 The development of delirium has been associated with increased morbidity,  
55 persistent functional decline, higher hospital costs, higher rates of residential aged  
56 care placement and increased mortality.[2, 4, 5] It is also a significant risk factor for  
57 later onset of dementia and acceleration of cognitive decline.[4] Though  
58 underdiagnosed, it is highly prevalent in hospitalizations, particularly so for palliative  
59 care populations[6, 7]; as many as 50% of people over the age of 65 who are  
60 admitted to hospital experience delirium depending on the clinical setting.[2]  
61 Despite being preventable in more than a third of cases, a study in Sweden showed  
62 that delirium remains a common complication in hospitalized elderly patients.[8]

1  
2  
3 63 A previous study in the United States, undertaken over a decade ago, assessed the  
4  
5  
6 64 costs associated with delirium after adjusting for patient sociodemographic and  
7  
8 65 clinical characteristics and found that hospital costs per day for patients with  
9  
10 66 delirium were more than double the costs of patients who did not experience an  
11  
12  
13 67 episode of delirium.[9] Additionally, previous studies have found associations  
14  
15 68 between delirium and long-term cognitive impairment and dementia,[10] and  
16  
17 69 premature death.[3, 11] However, the relative costs of these outcomes have not yet  
18  
19  
20 70 been established.

21  
22  
23 71 To date, no studies have estimated the costs of delirium in Australia. Understanding  
24  
25 72 the costs of delirium is important because delirium is often missed in as many as two  
26  
27 73 thirds of cases,[12] although there are validated tools for diagnosing delirium such as  
28  
29 74 the Confusion Assessment Method.[2]

30  
31  
32  
33 75 By better understanding the costs, morbidity and mortality of delirium, it is possible  
34  
35 76 to answer the question of whether it would be worthwhile to pay more attention to  
36  
37 77 its prevention and diagnosis. Understanding the costs of delirium also helps to make  
38  
39 78 informed decisions regarding treatment interventions. The purpose of this study was  
40  
41 79 to raise awareness of the impacts of delirium and contribute to improving policy in  
42  
43 80 this area, by quantifying the magnitude of the economic burden associated with  
44  
45 81 delirium in Australia in 2016-17.

## 51 82 **METHODS**

52  
53  
54  
55 83 This cost of illness study was conducted using standard methodology,[13] based on a  
56  
57 84 prevalence approach to cost measurement. Prevalence approaches measure the

1  
2  
3 85 number of people with a given condition in a base period and the costs associated  
4  
5 86 with treating them, as well as other financial and non-financial costs in that year due  
6  
7  
8 87 to the condition. This approach was combined with both bottom-up and top-down  
9  
10 88 approaches to estimate expenditure for each cost component.[13] For example, a  
11  
12  
13 89 top-down approach was used to estimate the costs of dementia due to delirium,  
14  
15 90 while most costs of delirium have been established using a bottom-up approach. The  
16  
17 91 methodology is consistent with previously published research in this field in Australia  
18  
19  
20 92 and internationally.[14-16] Costs were estimated from the perspective of Australian  
21  
22  
23 93 society for the 2016-17 financial year.

24  
25 94 In this study, the financial costs of delirium to the Australian health system include  
26  
27 95 the costs of running hospitals and nursing homes, general practitioner (GP) and  
28  
29 96 specialist services reimbursed through Australia's universal health insurance scheme  
30  
31 97 and private funds, the cost of pharmaceuticals and over-the-counter medications,  
32  
33 98 allied health services, research and health administration. The other financial costs  
34  
35 99 of delirium in this study include productivity costs, informal care, funeral costs, and  
36  
37 100 deadweight losses associated with taxation payments and administration. The loss of  
38  
39 101 wellbeing due to delirium was measured using disability adjusted life years (DALYs).

40  
41 102 A targeted literature review was conducted to identify the prevalence of delirium in  
42  
43 103 acute hospitalizations, nursing homes and in the community (without presenting to  
44  
45 104 hospital). The review also covered costs, productivity and other outcomes (e.g.  
46  
47 105 mortality and burden of disease) due to delirium. The targeted review was  
48  
49 106 investigative in nature and considered fit-for-purpose as the prevalence and  
50  
51  
52  
53  
54  
55  
56  
57  
58  
59  
60

1  
2  
3 107 methods vary widely across studies. Searches were conducted using PubMed in June  
4  
5 108 2017.

6  
7  
8  
9 109 Studies were included if they were conducted in a hospital setting, and covered  
10  
11 110 general hospital wards (medical or surgical) reflective of an acute setting. Studies  
12  
13 111 were also included if they included costs of delirium, including health system,  
14  
15 112 productivity, carer and wellbeing costs. Studies were excluded from the analysis if  
16  
17 113 they did not measure prevalence using validated diagnostic measures, or if they did  
18  
19 114 not report on costs or outcomes from delirium. Studies were further excluded if they  
20  
21 115 did not report on primary or administrative data. No specific date restrictions were  
22  
23 116 applied to the literature review due to the investigative nature of it. The specific  
24  
25 117 search terms used in the literature review are available in Additional File 1.

26  
27  
28 118 Results from the literature searches were generally pooled by taking a weighted  
29  
30 119 average of outcomes or results. Additional grey literature (e.g. government statistics)  
31  
32 120 were also collated and these documents provide many of the necessary inputs for  
33  
34 121 this cost of illness study.

## 35 36 37 38 39 40 41 122 **Prevalence**

42  
43  
44  
45 123 The prevalence of delirium in Australian hospitals was estimated by taking a  
46  
47 124 weighted average across identified studies (see Additional File 1, Table 1).

48  
49 125 Prevalence was then applied to overnight acute emergency hospital separations for  
50  
51 126 people aged 70 years or older in 2016-17 to estimate separations due to delirium in  
52  
53 127 elderly people in that year.[17]  
54  
55  
56  
57  
58  
59  
60

1  
2  
3 128 Additional diagnosis separations in younger age groups (less than 70 years old) were  
4  
5 129 estimated by applying the ratio between total and principal delirium diagnoses to  
6  
7  
8 130 principal diagnoses in the younger age groups. [17,18]  
9

10  
11 131 No prevalence studies in Australian nursing homes were identified. Prevalence  
12  
13 132 results were thus derived from a study from the Netherlands,[19] due to similarities  
14  
15 133 in aged care settings, demographic profiles and medication prescribing rates – for  
16  
17 134 example, both countries exhibit high rates of psychotropic medication prescribing  
18  
19 135 (though there are some differences in the preferred antipsychotic agent),[20]  
20  
21 136 despite their limited efficacy and adverse effects in people with delirium.[7] The  
22  
23 137 combined prevalence and incidence was 8.5% and 16.9 per 100 person-years  
24  
25 138 respectively. These rates are similar to the rates reported in other international  
26  
27 139 literature.[21-23] These rates were applied to the number of permanent residents in  
28  
29 140 aged care facilities in Australia, adjusting for population growth by age group from  
30  
31 141 the Australian Bureau of Statistics (ABS).[24]  
32  
33  
34  
35  
36  
37  
38

39 142 The total prevalence of delirium in Australia 2016-17 was adjusted to avoid double  
40  
41 143 counting people in the residential aged care cohort who also present to hospital. The  
42  
43 144 following rates were used to adjust the prevalence to avoid double counting people  
44  
45 145 in residential aged care who also present to hospital: 50% of cases were delirious at  
46  
47 146 admission;[25] 43% of hospitalized patients with delirium during their stay were  
48  
49 147 delirious at discharge (5.5% delirious at discharge, 12.7% with delirium);[26] 31.2%  
50  
51 148 were admitted from residential aged care while 68.9% were admitted from the  
52  
53 149 community;[27] and of people with delirium, 28% of patients were discharged to  
54  
55  
56  
57  
58  
59  
60

1  
2  
3 150 residential aged care, 63% were discharged to the community, and 9% died before  
4  
5  
6 151 discharge from hospital.[28]  
7

### 8 9 152 **Average duration of an episode of delirium and mortality**

10  
11  
12 153 The average duration of delirium was estimated by taking a weighted average of the  
13  
14 154 findings reported in twelve studies (Additional File 1, Table 2).  
15

16  
17 155 Mortality associated with delirium was estimated using an attributable fraction  
18  
19  
20 156 approach,[13] and a hazard ratio of 1.77 that was based on a previous systematic  
21  
22 157 review and meta-analysis (Additional File 1, Table 3).[3]. The hazard ratio was used  
23  
24  
25 158 to estimate an attributable fraction for how many deaths are due to delirium in  
26  
27 159 Australia.  
28

### 29 30 160 **Health care system expenditure**

31  
32  
33 161 Health system costs were estimated using a bottom-up approach. This includes costs  
34  
35  
36 162 associated with hospital, medication, and research expenditure, out of hospital  
37  
38 163 medical and other health professionals' expenditure, and residential aged care  
39  
40  
41 164 expenditure. Delirium induces functional decline, resulting in a longer length of stay  
42  
43 165 (LOS) for older people in hospital, consequently leading to higher hospitalization  
44  
45 166 expenditure.[2] To estimate the additional expenditure, the prevalence of delirium  
46  
47  
48 167 among hospitalized older people was applied to the additional LOS and the average  
49  
50  
51 168 daily cost of care in a hospital setting.  
52

53  
54 169 The average daily cost of an acute separation was obtained from the Independent  
55  
56 170 Hospital Pricing Authority (IHPA) for 2014-15 and adjusted by the standard index  
57  
58 171 rate used by IHPA (2.1%) to estimate the cost for the 2016-17 base year.[29] The  
59  
60

1  
2  
3 172 average daily cost was also adjusted by an additional 14.3% to inflate for non-  
4  
5  
6 173 allocated health costs (an allowance for capital costs) based on AIHW.[30]  
7  
8  
9 174 Delirium can also be recorded as an additional diagnosis in Australian hospital data,  
10  
11 175 where delirium contributes to a greater length of stay in hospital. The cost  
12  
13 176 associated with an increased length of stay was estimated using the average daily  
14  
15 177 cost of any hospital separation, which was further adjusted to remove separation  
16  
17 178 costs that are unlikely to be attributable to delirium, such as costs associated with  
18  
19 179 surgery. Where delirium was a primary diagnosis, the cost was assumed to be the  
20  
21 180 same as the delirium diagnostic resource group, which was £4,489 in 2016-17 after  
22  
23 181 updating for inflation in the National Efficient Price.[29]  
24  
25  
26  
27  
28  
29 182 Health research expenditure on delirium in Australia in 2016-17 was estimated using  
30  
31 183 data from the National Health and Medical Research Council (NHMRC) grants  
32  
33 184 database. The database outlines all NHMRC research grant funding between 2000  
34  
35 185 and 2016 and provides a description of the projects and key outcomes achieved.[31]  
36  
37  
38 186 Annual funding allocated to delirium research in 2016-17 was estimated by taking an  
39  
40 187 average across the historical years. Other forms of health research where research  
41  
42 188 costs can be recovered – for example, by charging a higher price for services – were  
43  
44 189 not considered in this analysis, consistent with standard methodology.[13]  
45  
46  
47  
48  
49 190 Out of hospital medical expenditure (GP consultations) was estimated by applying  
50  
51 191 the average cost per GP consultation (approximately £16 after adjusting for multiple  
52  
53 192 problems per GP consultation) to the total services associated with organic  
54  
55 193 psychoses in Australia,[32, 33] which was considered comparable to delirium.  
56  
57  
58  
59  
60



1  
2  
3 194 Residential aged care expenditure was estimated using an attributable fraction  
4  
5 195 approach based on literature to estimate admissions to aged care due to cognitive  
6  
7  
8 196 decline associated with delirium. The odds ratio for admission (2.41),[4] was  
9  
10 197 converted to an attributable fraction. The number of admissions was adjusted by  
11  
12 198 average LOS in residential aged care in Australia and applied to the average costs  
13  
14 199 associated with residential aged care, which is approximately £43,978 per person in  
15  
16 200 aged care.[34]

### 21 **Other financial costs**

22  
23  
24 202 The economic cost of short run productivity losses associated with absenteeism  
25  
26 203 were estimated using the friction cost method.[13] The absenteeism cost due to  
27  
28 204 delirium was estimated by multiplying the average duration of delirium by the  
29  
30 205 number of hospital separations that occur in the working age population, adjusted  
31  
32 206 for general population employment rates. Average employment rates and average  
33  
34 207 weekly earnings for people with delirium are based on ABS data for the general  
35  
36 208 population by age and gender.[35, 36]

37  
38  
39 209 Carers are people who provide care to others in need of assistance or support. An  
40  
41 210 informal carer provides this service without formal payment and does so outside of  
42  
43 211 the formal care sector. Evidence suggests that people with delirium experience a  
44  
45 212 decline in functioning, such that they are unable to perform as many usual activities  
46  
47 213 of daily living following delirium.[37, 38] Estimates of the hours of informal care  
48  
49 214 provided to people with delirium was based on this expected decline in activities of  
50  
51 215 daily living. The dollar value of informal care was estimated as the opportunity cost  
52  
53  
54  
55  
56  
57  
58  
59  
60

1  
2  
3 216 of a carer's time, which was based on general population average weekly earnings  
4  
5  
6 217 and employment rates.[35, 36]  
7

8  
9 218 The additional cost of funerals borne by family and friends of people with delirium  
10  
11 219 was based on the number of deaths associated with delirium. The cost of a funeral  
12  
13 220 was assumed to be £4,602. Funeral costs were brought forward by the average life  
14  
15 221 expectancy at age of death. The deadweight losses due to lost taxation revenue  
16  
17 222 (given an assumption of no change in spending) and additional government spending  
18  
19 223 on delirium was calculated by applying the average marginal excess burden of  
20  
21 224 taxation of £0.31 per £1 of tax.[39, 40]  
22  
23  
24  
25

## 26 225 **Loss of wellbeing**

27  
28  
29 226 Burden of disease methodology was employed to quantify the impact of delirium on  
30  
31 227 wellbeing.[41] The approach is non-financial, where pain, suffering and premature  
32  
33 228 mortality are measured in terms of disability adjusted life years (DALYs). DALYs are  
34  
35 229 comprised of years of healthy life lost due to morbidity (YLDs) and years of life lost  
36  
37 230 due to premature mortality (YLLs).[41] YLDs were calculated using a prevalence  
38  
39 231 approach, whereby the disability weight was multiplied by average duration of  
40  
41 232 delirium. The disability weight for delirium used in this study was 0.17.[42] Duration  
42  
43 233 of delirium was based on the prevalence of persistent delirium over 12 months.[43]  
44  
45 234 DALYs were converted to a monetary value using the value of a statistical life year  
46  
47 235 (£93,882), which is an official estimate updated for inflation using the Consumer  
48  
49 236 Price Index.[44] The value of a statistical life year was discounted at a rate of 3% per  
50  
51  
52  
53  
54  
55  
56  
57  
58  
59  
60

1  
2  
3 237 annum,[13] where it was applied to future years of life lost due to mortality from  
4  
5  
6 238 delirium.

7  
8  
9 239 **Costs of dementia attributable to delirium**

10  
11 240 Costs of dementia were sourced from an Australian cost of illness study.[45] Inputs  
12  
13  
14 241 were taken for Australia in the 2016 financial year, and updated using either health  
15  
16  
17 242 inflation or the Consumer Price Index as appropriate. The wellbeing cost attributable  
18  
19 243 to dementia for YLLs or YLDs was estimated using data from the Australian Institute  
20  
21 244 of Health and Welfare's Australian Burden of Disease Study.[46] The proportion of  
22  
23  
24 245 dementia attributable to delirium was estimated using the population attributable  
25  
26  
27 246 fraction approach. The odds ratio for developing a new case was 5.88 for people  
28  
29 247 aged 65-84 years old and 7.56 for people aged 85 years or older,[47-49] which was  
30  
31 248 used to estimate the attributable fraction.

32  
33  
34 249 **Sensitivity analysis**

35  
36  
37 250 One-way sensitivity analyses were conducted on prevalence, the risk for mortality,  
38  
39 251 dementia admission to aged care, average hospital costs, discount rate for DALYs,  
40  
41  
42 252 and the value of a statistical life year. The specific values represent the upper and  
43  
44  
45 253 lower 95% confidence intervals for the relevant input parameters where available, or  
46  
47 254 unit costs that were 25% higher or lower if the distribution was unknown.

48  
49  
50 255 **Currency standardization**

51  
52  
53 256 All costs are expressed in 2016-17 pound sterling. Costs were converted from  
54  
55  
56 257 Australian dollars using the 2017 Organisation for Economic Cooperation and  
57  
58  
59  
60

1  
2  
3 258 Development purchasing power parity of 2.065 Australian dollars per pound sterling  
4  
5  
6 259 in 2017.[50]  
7

## 8 9 260 **Data analysis and ethical considerations**

10  
11 261 Data for this study was collected throughout January to June 2017 by the authors  
12  
13  
14 262 from a range of public data sources and literature. The data was analyzed and  
15  
16  
17 263 compiled in Microsoft Excel. No individual patient data was collected for the study  
18  
19 264 and therefore, this study did not require ethics approval.  
20  
21

## 22 265 **Patient and public involvement**

23  
24  
25 266 Patient and public were not involved in the design or planning of this study.  
26  
27

## 28 29 267 **RESULTS**

### 30 31 32 268 **Prevalence and mortality**

33  
34  
35 269 Overall, the prevalence of delirium in a hospital setting was estimated to be 20.2%  
36  
37 270 on average, which was applied to the 521,099 overnight acute emergency hospital  
38  
39 271 separations for people aged 70 years or older in 2016-17. Therefore, there were an  
40  
41 272 estimated 105,182 hospital separations involving delirium in 2016-17, of which  
42  
43 273 delirium was recorded as the principal diagnosis for approximately 11,999  
44  
45 274 separations in 2016-17. In addition, there were an estimated 14,578 separations for  
46  
47 275 younger Australians, and 119,760 total cases of delirium in Australian hospitals in  
48  
49 276 2016-17.  
50  
51

52  
53  
54  
55 277 In Australia on 30 June 2015, there were 172,044 permanent residents in aged care  
56  
57 278 facilities. There were an estimated 181,314 permanent residents in Australian aged  
58  
59  
60

279 care facilities on 30 June 2017 after adjusting for population growth by age group.

280 Applying the prevalence (at baseline), and the incidence per 100 person years from

281 Boorsma et al,[19] it was estimated that 46,054 permanent residents had at least

282 one episode of delirium in 2016-17.

283 After adjusting for the interactions between delirium in aged care and hospital

284 settings, there were an estimated 132,595 cases of delirium in Australia in 2016-17,

285 representing cases that occur in both settings. This is equivalent to approximately

286 0.5% of the population in Australia, although some individuals may experience

287 delirium more than once in a year. Prevalence by age and gender are available in

288 Table 1. The rates increase substantially with age.

289 Table 1. Estimated prevalence of delirium in Australia, 2016-17

| <i>Age/ gender</i> | <i>Community</i> | <i>Residential aged care</i> | <i>Total</i>   | <i>% of general population</i> |
|--------------------|------------------|------------------------------|----------------|--------------------------------|
| <b>Male</b>        |                  |                              |                |                                |
| <65                | 3,278            | 1,756                        | 5,034          | 0.05                           |
| 65-69              | 1,916            | 1,281                        | 3,197          | 0.5                            |
| 70-74              | 4,342            | 2,088                        | 6,430          | 1.4                            |
| 75-89              | 6,282            | 2,868                        | 9,149          | 2.8                            |
| 80-84              | 9,680            | 3,545                        | 13,225         | 6.3                            |
| 85+                | 18,651           | 3,263                        | 21,914         | 11.8                           |
| <i>Total</i>       | <i>44,149</i>    | <i>14,801</i>                | <i>58,949</i>  | <i>0.5</i>                     |
| <b>Female</b>      |                  |                              |                |                                |
| <65                | 4,100            | 746                          | 4,846          | 0.05                           |
| 65-69              | 1,994            | 778                          | 2,773          | 0.5                            |
| 70-74              | 4,044            | 1,523                        | 5,567          | 1.1                            |
| 75-79              | 6,224            | 2,771                        | 8,996          | 2.5                            |
| 80-84              | 9,195            | 5,270                        | 14,465         | 5.5                            |
| 85+                | 16,835           | 20,164                       | 36,999         | 11.9                           |
| <i>Total</i>       | <i>42,393</i>    | <i>31,253</i>                | <i>73,646</i>  | <i>0.6</i>                     |
| <b>Person</b>      | <b>86,541</b>    | <b>46,054</b>                | <b>132,595</b> | <b>0.5</b>                     |

290

1  
2  
3 291 The hazard ratio for mortality indicated that 12,571 people who had delirium would  
4  
5 292 die, and an estimated 909 deaths were attributable to delirium itself in 2016-17.  
6  
7

### 8 293 **Health care system expenditure**

9  
10  
11 294 Delirium most commonly occurred in hospitals in Australia in 2016-17, with an  
12  
13 295 estimated 119,760 cases (some of these individuals usually reside in aged care).  
14  
15  
16 296 Delirium was recorded as the primary diagnosis in 13,662 separations at an average  
17  
18 297 cost of £4,489 per separation in 2016-17. Delirium was recorded as an additional  
19  
20 298 diagnosis in a further 106,098 separations. The average daily cost for an additional  
21  
22 299 separation was estimated to be £644, which was multiplied by the number of cases  
23  
24 300 and the additional LOS due to delirium, which was estimated to be 2.7 days (see  
25  
26 301 Additional File 1, Table 4 and Additional File 1, Table 5). After adjusting for  
27  
28 302 population growth, there were estimated to be 22,640 GP consultations associated  
29  
30 303 with delirium in 2016-17, which was multiplied by £16 per consultation to estimate  
31  
32 304 total GP costs.  
33  
34  
35  
36  
37  
38

39 305 Total health system and aged care costs associated with delirium in Australia were  
40  
41 306 estimated to be £844.2 million in 2016-17. The total comprised hospital  
42  
43 307 (£247.3 million), residential aged care (£596.2 million), out-of-hospital medical (£0.4  
44  
45 308 million), and research expenditure (£0.3 million).  
46  
47  
48

### 49 309 **Other financial costs**

50  
51  
52 310 On average, it was estimated that each person with delirium received an additional  
53  
54 311 0.9 hours of care per week, based on the change in activities of daily living over a  
55  
56 312 period of 12 months (Additional File 1 provides supplementary information that was  
57  
58  
59  
60

1  
2  
3 313 used to estimate the additional hours of care). Thus, informal carers provided an  
4  
5 314 estimated 987,958 hours of care in 2016-17, which was valued at £0.8 million. The  
6  
7  
8 315 cost of informal care (£0.8 million) is relatively small due to the low opportunity cost  
9  
10 316 of carer time (£0.84 per hour).

11  
12  
13 317 We estimate that working age people with delirium were absent from work for  
14  
15  
16 318 44,590 days in 2016-17, which was valued at £6.6 million using average weekly  
17  
18 319 earnings for the general population.

20  
21 320 Finally, brought forward funeral costs were estimated to be £0.7 million and  
22  
23  
24 321 deadweight losses were estimated to be £188.4 million in Australia 2016-17. Thus,  
25  
26 322 total other financial costs (informal care, absenteeism, brought forward funeral costs  
27  
28 323 and deadweight losses) were estimated to be £196.6 million in Australia in 2016-17.  
29  
30 324 Productivity losses imposed by delirium were estimated to be relatively small as  
31  
32 325 delirium largely occurs in the elderly population.

### 33 34 35 36 37 326 **Loss of wellbeing**

38  
39  
40 327 The total burden of disease from delirium in 2016-17 was estimated to be  
41  
42 328 £994.1 million. Overall, delirium resulted in an estimated: 5,441 years of healthy life  
43  
44 329 lost due to disability (YLDs), or 0.041 YLDs per person with delirium; 5,687 years of  
45  
46 330 life lost due to premature death (YLLs), or 0.043 YLLs per person with delirium; and  
47  
48 331 11,128 DALYs overall, or around 0.084 DALYs per person with delirium in 2016-17.

### 50 51 52 53 332 **Costs of dementia attributable to delirium**

54  
55  
56 333 Overall, it was estimated that 40,981 or 10.6% cases of dementia were attributable  
57  
58 334 to delirium, which largely occur in people aged 85 years or older. The total costs of

335 dementia due to delirium were estimated to be £2.2 billion in Australia in 2016-17,  
 336 of which the financial costs were £675.7 million and the loss of wellbeing was  
 337 £1.6 billion. Table 2 shows cost breakdowns by age and gender group. Figure 1  
 338 shows the costs of dementia due to delirium broken down by health system and  
 339 aged care costs, other financial costs and burden of disease.

340 Table 2. Estimated costs of delirium in Australia in 2016-17, by age and gender group,  
 341 £ million or %

| <i>Age/<br/>gender</i> | <i>Financial cost</i> |                                     | <i>Wellbeing cost</i> |                                     | <i>Total</i>   | <i>% of<br/>total</i> |
|------------------------|-----------------------|-------------------------------------|-----------------------|-------------------------------------|----------------|-----------------------|
|                        | <i>Delirium</i>       | <i>Dementia due<br/>to delirium</i> | <i>Delirium</i>       | <i>Dementia due<br/>to delirium</i> |                |                       |
| <b>Male</b>            |                       |                                     |                       |                                     |                |                       |
| <65                    | 15.0                  | -                                   | 19.5                  | -                                   | 34.5           | 1                     |
| 65-69                  | 8.1                   | 7.9                                 | 12.6                  | 5.1                                 | 33.7           | 1                     |
| 70-74                  | 57.5                  | 22.3                                | 26.8                  | 18.2                                | 124.8          | 3                     |
| 75-89                  | 81.9                  | 48.2                                | 43.7                  | 67.6                                | 241.4          | 6                     |
| 80-84                  | 124.6                 | 67.9                                | 89.5                  | 126.3                               | 408.4          | 10                    |
| 85+                    | 233.5                 | 154.1                               | 260.6                 | 368.2                               | 1,016.3        | 24                    |
| <b>Female</b>          |                       |                                     |                       |                                     |                |                       |
| <65                    | 14.7                  | -                                   | 18.7                  | -                                   | 33.4           | 1                     |
| 65-69                  | 7.0                   | 9.8                                 | 10.8                  | 7.2                                 | 34.8           | 1                     |
| 70-74                  | 52.2                  | 14.6                                | 22.4                  | 13.8                                | 103.0          | 2                     |
| 75-79                  | 81.0                  | 47.1                                | 39.7                  | 72.2                                | 240.0          | 6                     |
| 80-84                  | 121.9                 | 71.1                                | 80.3                  | 144.0                               | 417.4          | 10                    |
| 85+                    | 243.3                 | 232.9                               | 369.4                 | 729.0                               | 1,574.6        | 37                    |
| <b>Overall</b>         | <b>1,040.8</b>        | <b>675.7</b>                        | <b>994.1</b>          | <b>1,551.6</b>                      | <b>4,262.2</b> | <b>100</b>            |
| <b>% of<br/>total</b>  | <b>24</b>             | <b>16</b>                           | <b>23</b>             | <b>36</b>                           | <b>100</b>     |                       |

342

343 (INSERT FIGURE 1)

#### 344 **Total costs**

345 The total costs of delirium in Australia were estimated to be £4.3 billion  
 346 (AUD8.8 billion) in 2016-17. The total cost comprised financial costs of £1.7 billion  
 347 (AUD3.5 billion) and the value of healthy life lost of £2.5 billion (AUD5.3 billion).

18



348 Table 3 shows the costs of delirium broken down by health system and aged care  
 349 costs, other financial costs, and burden of disease.

350 Table 3. Estimated costs of delirium in Australia in 2016-17, by cost component

| <i>Cost component</i>       | <i>Total (£ million)</i> | <i>Per person with delirium (£)</i> |
|-----------------------------|--------------------------|-------------------------------------|
| Health system and aged care | 1,299.9                  | 9,804                               |
| Other financial costs       | 416.6                    | 3,142                               |
| Loss of wellbeing           | 2,545.7                  | 19,199                              |
| <b>Total costs</b>          | <b>4,262.2</b>           | <b>32,145</b>                       |

### 352 Sensitivity analysis

353 The results and specific values for the sensitivity analysis are shown in Table 4 and  
 354 Figure 2. The total cost of delirium in Australia was most sensitive to changes in the  
 355 risk for dementia following delirium and the overall prevalence rate. The total cost of  
 356 delirium was estimated to range from £2.6 billion to £5.9 billion in Australia in  
 357 2016-17.

358 Table 4. Sensitivity analysis, £ million

| <i>Variable</i>                                          | <i>Financial</i> | <i>Loss of wellbeing</i> | <i>Total</i> |
|----------------------------------------------------------|------------------|--------------------------|--------------|
| Base case                                                | 1,716.5          | 2,545.7                  | 4,262.2      |
| Prevalence (20.2%)                                       |                  |                          |              |
| Lower (17.0%)                                            | 1,333.3          | 2,110.6                  | 3,443.9      |
| Upper (23.3%)                                            | 2,141.1          | 2,993.6                  | 5,134.7      |
| Risk for mortality (OR = 1.77)                           |                  |                          |              |
| Upper (OR = 2.15)                                        | 1,716.8          | 2,757.9                  | 4,474.8      |
| Lower (OR = 1.39)                                        | 1,716.2          | 2,316.7                  | 4,032.9      |
| Risk for dementia (OR for >65 = 5.88, OR for >85 = 7.56) |                  |                          |              |
| Upper (OR for >65 = 20.70, OR for >85 = 29.43)           | 2,191.0          | 3,678.2                  | 5,869.2      |
| Lower (OR for >65 = 1.69, OR for >85 = 1.96)             | 1,213.0          | 1,372.8                  | 2,585.8      |
| Risk for admission to aged care (OR = 2.41)              |                  |                          |              |
| Upper (OR = 3.29)                                        | 1,993.3          | 2,545.7                  | 4,539.0      |
| Lower (OR = 1.77)                                        | 1,453.8          | 2,545.7                  | 3,999.6      |
| Average hospital costs*                                  |                  |                          |              |
| Upper (+25%)                                             | 1,794.7          | 2,545.7                  | 4,340.4      |
| Lower (-25%)                                             | 1,638.4          | 2,545.7                  | 4,184.1      |
| Discount rate for DALYs (3%)                             |                  |                          |              |
| Upper (7%)                                               | 1,716.5          | 2,488.6                  | 4,205.1      |
| Lower (0%)                                               | 1,716.5          | 2,596.3                  | 4,312.9      |

359 \* hospital costs were varied for delirium only, not dementia.

360

361 (INSERT FIGURE 2)

## 362 DISCUSSION

363 This is the first cost of illness study estimating the economic impact of delirium in the  
 364 Australian population. While a number of studies have examined the financial costs  
 365 of delirium, they are generally limited to specific services or population  
 366 subgroups.[5] There have been no previous attempts to estimate the cost of delirium  
 367 taking into account both the financial and wellbeing costs, as this study has done. It

1  
2  
3 368 is critical that such economic estimations are undertaken as they inform decision  
4  
5  
6 369 making.

7  
8  
9 370 According to these estimates, delirium imposes a substantial burden on society.

10  
11 371 Considering delirium alone, the economic costs were mostly incurred by the health  
12  
13 372 and aged care systems (£844.2 million), representing close to 1.5% of total  
14  
15  
16 373 expenditure on health and aged care in Australia. As many high-income western  
17  
18 374 countries are dealing with issues of aging demographics and cognitive impairment,  
19  
20 375 the findings may be generalizable to other health and aged care systems. For  
21  
22 376 example, previous research has found that delirium is associated with multiple  
23  
24 377 adverse outcomes including increased length and cost of hospitalization, functional  
25  
26 378 and cognitive decline, institutionalization, and mortality.[2-5, 51] These results have  
27  
28 379 significant implications for governments, who aim to identify conditions with high  
29  
30 380 social and financial costs for focused attention through public education and other  
31  
32 381 initiatives that effect improvements in health status. The results of this study  
33  
34 382 highlight the need for concerted, worldwide efforts to mitigate the impacts of this  
35  
36 383 clinically significant and costly medical condition.

37  
38  
39 384 According to these estimates, there were 132,595 occurrences of delirium in  
40  
41 385 Australia in 2016-17, but data from the Australian Institute of Health and Welfare  
42  
43 386 National Hospital Morbidity Database for 2015-16 indicate that as many as 1 in 5  
44  
45 387 cases are missed. This is supported by previous research which suggests that  
46  
47 388 delirium is undiagnosed in a large number of cases, ranging from approximately 25%  
48  
49 389 of cases up to 87.5% in cases where dementia is also present.[12] This has significant  
50  
51  
52  
53  
54  
55  
56  
57  
58  
59  
60

1  
2  
3 390 implications for clinical practice as the outcomes of delirium are serious.[1] Future  
4  
5 391 research could focus on techniques to improve the detection rate.  
6  
7

8  
9 392 Dementia represents a significant cost to the economy of all countries; the cost of  
10  
11 393 dementia due to delirium is therefore an important cost component of delirium. It  
12  
13 394 has been estimated that 47 million people are living with dementia globally, with  
14  
15 395 costs of £583 billion in 2015 (original estimate converted from US dollars to pound  
16  
17 396 sterling using purchasing power parity of 0.713);[ 50, 52] moreover, prevalence is  
18  
19 397 expected to triple over the next three decades.[52] Overall, the costs of dementia  
20  
21 398 attributable to delirium more than doubled the total costs of delirium in Australia in  
22  
23 399 2016-17. It was estimated that approximately 10.6% of dementia cases, and thus  
24  
25 400 costs, are associated with delirium. Therefore, delirium imposes a large cost burden  
26  
27 401 on residential aged care, due to the high prevalence of dementia and the strong  
28  
29 402 relationships between cognitive impairment and aged care. There may be  
30  
31 403 considerable opportunities to prevent some of the worldwide burden of dementia  
32  
33 404 and improve the fiscal sustainability of health systems in the face of aging  
34  
35 405 populations.  
36  
37  
38  
39  
40  
41  
42

43 406 Care for delirium following discharge from hospital relies heavily on informal carers,  
44  
45 407 who provided almost 1 million hours of care to people with delirium. As workforce  
46  
47 408 participation increases and the propensity to care declines,[53] there is a risk that  
48  
49 409 the care needs of people with delirium will either go unmet, or require additional  
50  
51 410 government funding for aged care to meet their needs.  
52  
53  
54  
55  
56  
57  
58  
59  
60

1  
2  
3 411 There are some limitations to this study. First, the methods outlined the use of a  
4  
5 412 non-systematic search strategy, noting that this was fit-for-purpose when a number  
6  
7  
8 413 of inputs were derived from official Australian Government statistics. The estimates  
9  
10 414 presented should be interpreted with this in mind. Second, limited studies were  
11  
12  
13 415 found with appropriate methods to robustly estimate the prevalence of delirium in  
14  
15 416 Australian hospital settings, but also in community or residential aged care settings.  
16  
17  
18 417 In order to minimize the impact of this limitation and the risk of double counting  
19  
20 418 across studies, the analysis focused on delirium which met the full diagnostic criteria.  
21  
22  
23 419 Similarly, data paucity in some areas, such as out-of-hospital medical costs and  
24  
25 420 productivity losses (employment outcomes) means that total estimates may be  
26  
27 421 conservative. Given the methodology, the costs of delirium presented in this paper  
28  
29 422 should be treated as an estimate only. More research, including observational  
30  
31 423 studies in Australian settings, is required to understand the true costs incurred by  
32  
33 424 people with delirium. However, a study that can capture costs across the health  
34  
35 425 system and aged care settings in Australia will be technically challenging and may  
36  
37 426 not be feasible due to the fragmented nature of the systems and data collection –  
38  
39 427 particularly beyond the point at which people interact with the system. Finally, cost  
40  
41 428 of illness studies provide guidance on the size of the problem, but are only useful for  
42  
43 429 informing cost effective options for change when compared to the cost of such  
44  
45 430 interventions. More work is needed to identify cost effective options to reduce the  
46  
47 431 burden of delirium in Australia.  
48  
49  
50  
51  
52  
53  
54

## 55 432 **CONCLUSION**

56  
57  
58  
59  
60

1  
2  
3 433 In summary, delirium imposes a substantial burden on Australian society – both in  
4  
5  
6 434 terms of financial costs associated with health system expenditure and a greater  
7  
8 435 need for residential aged care due to the functional and cognitive decline associated  
9  
10  
11 436 with delirium and dementia. The financial costs of delirium were largely borne by  
12  
13 437 Australian governments due to the health system and aged care expenditure.

14  
15  
16 438 Further research should seek to understand the causes, treatment and prognosis of  
17  
18 439 delirium, especially with regard to potential pathways from an episode of delirium to  
19  
20  
21 440 subsequent mortality outcomes and reduced cognitive functioning. Improving  
22  
23 441 mortality outcomes and reducing decline in cognitive functioning would help to  
24  
25  
26 442 reduce the substantial financial and wellbeing costs of delirium.

## 27 28 29 443 **ACKNOWLEDGEMENTS**

### 30 31 32 444 **Author contributions:**

33  
34  
35 445 LP, JS and GC conceived of and designed the study. JS, JH and LP collated the data,  
36  
37 446 performed the data analysis and contributed to interpretation and reporting of the  
38  
39 447 data. AT, MA and GC contributed to the interpretation and reporting of the data. All  
40  
41 448 authors read, commented on and approved the final manuscript, and all authors  
42  
43 449 reviewed the manuscript for important intellectual content. The sponsor was not  
44  
45 450 directly involved in the findings of the research.

### 46 47 48 451 **Conflicts of interest**

49  
50  
51 452 The authors declare that they have no competing interests.

### 52 53 54 453 **Funding sources**

1  
2  
3 454 The research was supported by the Australasian Delirium Association.  
4  
5

6 455 **Data sharing statement**  
7  
8

9 456 No additional data are available.  
10  
11

12 457 **FIGURE LEGENDS**  
13  
14  
15

16 458 Figure 1 Costs of delirium and dementia due to delirium in Australia in 2016-17, £  
17  
18 459 million.

20  
21 460 Figure 2 Sensitivity analysis (tornado diagram) showing the impact of key parameter  
22  
23 461 inputs on the total cost of delirium in Australia in 2016 17.  
24  
25  
26  
27  
28  
29  
30  
31  
32  
33  
34  
35  
36  
37  
38  
39  
40  
41  
42  
43  
44  
45  
46  
47  
48  
49  
50  
51  
52  
53  
54  
55  
56  
57  
58  
59  
60

## REFERENCES

1. Caplan GA, Kurrle S, Cumming A. Appropriate care for older people with cognitive impairment in hospital. *Med J Aust.* 2016;205(10):S12-S15. doi: 10.5694/mja15.00898 [published online first: 21 Nov 2016].
2. Inouye S, Westendorp R, Saczynski J. Delirium in elderly people. *Lancet.* 2014;383:911-922.
3. American Psychiatric Association. Diagnostic and statistical manual of mental disorders (DSM-5®). American Psychiatric Pub; 2013 May 22.
4. Witlox J, Eurelings LS, de Jonghe JF, et al. Delirium in elderly patients and the risk of postdischarge mortality, institutionalization, and dementia: a meta-analysis. *JAMA.* 2010;304(4):443-451.
5. Leslie D, Inouye S. The importance of delirium: economic and societal costs. *J Am Geriatr Soc.* 2011;59(2):241-243.
6. Siddiqi N, House AO, Holmes JD. Occurrence and outcome of delirium in medical in-patients: a systematic literature review. *Age Ageing.* 2006;35:350-364.
7. Mittal V, Sunanda M, Williamson D, et al. Delirium in the elderly: A comprehensive review. *Am J Alzheimers Dis Other Demen.* 2011;26(2):97-109.



- 1  
2  
3 8. Johansson YA, Bergh I, Ericsson I, Sarenmalm EK. Delirium in older  
4 hospitalized patients—signs and actions: a retrospective patient record  
5 review. *BMC Geriatrics*. 2018;18(1):43.  
6  
7
- 8  
9  
10  
11 9. Leslie D, Marcantonio ER, Zhang Y et al. One-year health care costs associated  
12 with delirium in the elderly population. *Arch Intern Med*. 2008;168(1):27-32.  
13  
14
- 15  
16  
17 10. Pandharipande PP, Girard TD, Jackson JC, et al. Long-term cognitive  
18 impairment after critical illness. *N Engl J Med*. 2013;369(14):1306-1316.  
19  
20
- 21  
22  
23 11. Leslie DL, Zhang Y, Holford TR et al. Premature death associated with delirium  
24 at 1-year follow-up. *Arch Intern Med*. 2005;165:1657-1662.  
25  
26
- 27  
28  
29 12. Speed G, Wynaden D, McGowan S, et al. Prevalence rate of delirium at two  
30 hospitals in Western Australia. *Aust J Adv Nurs*. 2007;25(1):38-43.  
31  
32
- 33  
34  
35 13. Segel JE. Cost-of-illness studies- A primer. RTI-UNC Center of Excellence in  
36 Health Promotion Economics. 2006. Available from:  
37  
38 [https://www.rti.org/sites/default/files/resources/COI\\_Primer.pdf](https://www.rti.org/sites/default/files/resources/COI_Primer.pdf) (accessed  
39  
40  
41  
42  
43  
44  
45 11 Dec 2017).
- 46  
47  
48 14. Pezzullo L, Streatfeild J, Simkiss P, Shickle D. The economic impact of sight  
49 loss and blindness in the UK adult population. *BMC Health Serv Res*.  
50  
51  
52  
53 2018;18:63.
- 54  
55  
56 15. Hillman D, Mitchell S, Streatfeild J, et al. The economic cost of inadequate  
57 sleep. *Sleep*. 2018;41(8):zsy083. doi.org/10.1093/sleep/zsy083 [published  
58  
59  
60 online first: 4 Jun 2018].

- 1  
2  
3 16. Taylor HR, Pezzullo ML, Keeffe JE. The economic impact and cost of visual  
4  
5  
6  
7  
8  
9  
10  
11  
12  
13  
14  
15  
16  
17  
18  
19  
20  
21  
22  
23  
24  
25  
26  
27  
28  
29  
30  
31  
32  
33  
34  
35  
36  
37  
38  
39  
40  
41  
42  
43  
44  
45  
46  
47  
48  
49  
50  
51  
52  
53  
54  
55  
56  
57  
58  
59  
60  
impairment in Australia. *Br J Ophthalmol*. 2006;90:272-5.
17. Australian Institute of Health and Welfare (AIHW). Admitted patient care  
2014-15, Australian hospital statistics, Health services series no. 68, cat. no.  
HSE 172, Canberra: AIHW. 2016.
18. Australian Institute of Health and Welfare (AIHW). Principal diagnosis data  
cubes. Retrieved from [http://www.aihw.gov.au/hospitals-data/principal-  
diagnosis-data-cubes/](http://www.aihw.gov.au/hospitals-data/principal-diagnosis-data-cubes/). 2017.
19. Boorsma M, Joling KJ, Frijters DH, et al. The prevalence, incidence and risk  
factors for delirium in Dutch nursing homes and residential care homes.  
*Intern J Geriatr Psychiatry*. 2011; 27(7): 709-715.
20. Taxis K, Kochen S, Wouters H, et al. Cross-national comparison of medication  
use in Australian and Dutch nursing homes. *Age ageing*. 2016;46(2):320-3.  
doi:10.1093/ageing/afw218 [published online first: 14 Dec 2016].
21. McCusker J, Cole MG, Voyer P, et al. Prevalence and incidence of delirium in  
long-term care. *Int J Geriatr Psychiatry*. 2011; 26(11): 1152-1161.
22. Dosa D, Intrator O, McNicoll L, et al. Preliminary derivation of a nursing home  
confusion assessment method based on data from the minimum data set. *J  
Am Geriatr Soc*. 2007; 55(7): 1099-1105.

- 1  
2  
3 23. Kiely, DK, Bergmann, MA, Murphy KM, et al. Delirium among newly admitted  
4 postacute facility patients: prevalence, symptoms, and severity. *J Gerontol A*  
5 *Biol Sci Med Sci.* 2003; 58(5): M441-M445.  
6  
7  
8  
9  
10  
11 24. Australian Bureau of Statistics. Population projections, Australia, 2012 (base)  
12 to 2101 [Internet]. 2013 [cited 2017 Dec 11]; ABS, cat. no. 3222.0. Available  
13 from: <http://www.abs.gov.au/ausstats/abs@.nsf/mf/3222.0>.  
14  
15  
16  
17  
18  
19 25. Barron EA, Holmes J. Delirium within the emergency care setting, occurrence  
20 and detection: a systematic review. *Emerg Med J.* 2013; 30(4): 263-268.  
21  
22  
23  
24  
25 26. McAvay GJ, Van Ness PH, Bogardus ST, et al. Older adults discharged from the  
26 hospital with delirium: 1-year outcomes. *J Am Geriatr Soc.* 2006; 54(8): 1245-  
27 1250.  
28  
29  
30  
31  
32  
33 27. Travers C, Byrne G, Pachana N, et al. Prospective observational study of  
34 dementia and delirium in the acute hospital setting. *Intern Med J.* 2013;  
35 43(3): 262-269.  
36  
37  
38  
39  
40  
41 28. Inouye, SK, Rushing JT, Foreman MD, et al. Does delirium contribute to poor  
42 hospital outcomes? *J Gen Intern Med.* 1998; 13(4): 234-242.  
43  
44  
45  
46  
47  
48 29. Independent Hospital Pricing Authority (IHPA). National Hospital Cost Data  
49 Collection, Public Hospitals Cost Report, Round 19 (Financial Year 2014-15)  
50 [Internet]. 2017 Mar 2 [cited 2017 Dec 13]. Available from  
51 [https://www.ihoa.gov.au/publications/national-hospital-cost-data-collection-](https://www.ihoa.gov.au/publications/national-hospital-cost-data-collection-public-hospitals-cost-report-round-19-financial)  
52 [public-hospitals-cost-report-round-19-financial](https://www.ihoa.gov.au/publications/national-hospital-cost-data-collection-public-hospitals-cost-report-round-19-financial).  
53  
54  
55  
56  
57  
58  
59  
60

- 1  
2  
3 30. Australian Institute of Health and Welfare (AIHW). 2004 May 11. Health  
4 system expenditure on disease and injury in Australia 2000-01, cat. no. HWE  
5 26 [Internet]. 2004 May 11 [cited 2017 Dec 13]. Available from  
6 [https://www.aihw.gov.au/reports/health-welfare-expenditure/health-](https://www.aihw.gov.au/reports/health-welfare-expenditure/health-system-expenditure-on-disease-and-injury-in/contents/table-of-contents)  
7 [system-expenditure-on-disease-and-injury-in/contents/table-of-contents.](https://www.aihw.gov.au/reports/health-welfare-expenditure/health-system-expenditure-on-disease-and-injury-in/contents/table-of-contents)  
8  
9  
10  
11  
12  
13  
14  
15  
16 31. National Health and Medical Research Council. Research Funding Statistics  
17 and Data: All Grants 2000-2016. 2017. Available from:  
18 [https://www.nhmrc.gov.au/grants-funding/research-funding-statistics-and-](https://www.nhmrc.gov.au/grants-funding/research-funding-statistics-and-data)  
19 [data \(accessed 6 Dec 2017\).](https://www.nhmrc.gov.au/grants-funding/research-funding-statistics-and-data)  
20  
21  
22  
23  
24  
25  
26  
27 32. Department of Health. Annual Medicare Statistics – Financial Year 1984-85 to  
28 2015-16. 2016. Available from: <http://www.health.gov.au/medicarestats>  
29  [\(accessed 6 Dec 2017\).](http://www.health.gov.au/medicarestats)  
30  
31  
32  
33  
34  
35 33. Charles J, Miller G, Ng A. Management of psychosis in Australian general  
36 practice. *Aust Fam Physician*. 2006;35(3):88.  
37  
38  
39  
40  
41 34. Aged Care Financing Authority. Fourth Report on the Funding and Financing  
42 of the Aged Care Industry [Internet]. 2016 [cited 2017 Dec 11]. Available from  
43 [https://agedcare.health.gov.au/2016-report-on-the-funding-and-financing-](https://agedcare.health.gov.au/2016-report-on-the-funding-and-financing-of-the-aged-care-industry)  
44 [of-the-aged-care-industry.](https://agedcare.health.gov.au/2016-report-on-the-funding-and-financing-of-the-aged-care-industry)  
45  
46  
47  
48  
49  
50  
51  
52 35. Australian Bureau of Statistics. Labour Force, Australia, Jun 2016, Cat. No.  
53 6202.0 [Internet]. 2016 Jul 14 [cited 2017 Dec 11]. Available from:  
54 [http://www.abs.gov.au/AUSSTATS/abs@.nsf/DetailsPage/6202.0Jun%20201](http://www.abs.gov.au/AUSSTATS/abs@.nsf/DetailsPage/6202.0Jun%202016?OpenDocument)  
55 [6?OpenDocument.](http://www.abs.gov.au/AUSSTATS/abs@.nsf/DetailsPage/6202.0Jun%202016?OpenDocument)  
56  
57  
58  
59  
60

- 1  
2  
3 36. Australian Bureau of Statistics. Average Weekly Earnings, Australia, May  
4  
5 2017, Cat. No. 6302.0 [Internet]. 2017 Aug 17 [cited 2017 Dec 11]. Available  
6  
7 from:  
8  
9  
10 <http://www.abs.gov.au/AUSSTATS/abs@.nsf/Lookup/6302.0Main+Features1>  
11  
12 [May%202017?OpenDocument](http://www.abs.gov.au/AUSSTATS/abs@.nsf/Lookup/6302.0Main+Features1).  
13  
14  
15  
16 37. Vida S, du Fort GG, Kakuma R, et al. An 18-month prospective cohort study of  
17  
18 functional outcome of delirium in elderly patients: activities of daily living. *Int*  
19  
20 *Psychogeriatr*. 2006 Dec;18(4):681-700.  
21  
22  
23  
24 38. Murray AM, Levkoff SE, Wetle TT, et al. Acute delirium and functional decline  
25  
26 in the hospitalized elderly patient. *J Gerontol*. 1993 Sep 1;48(5):M181-M186.  
27  
28  
29  
30 39. KPMG Econtech. (2010). CGE analysis of the current Australian tax system,  
31  
32 Report for the Australian Government. 2010. Available from:  
33  
34 [http://www.taxreview.treasury.gov.au/content/html/commissioned\\_work/d](http://www.taxreview.treasury.gov.au/content/html/commissioned_work/downloads/KPMG_Econtech_Efficiency%20of%20Taxes_Final_Report.pdf)  
35  
36 [ownloads/KPMG\\_Econtech\\_Efficiency%20of%20Taxes\\_Final\\_Report.pdf](http://www.taxreview.treasury.gov.au/content/html/commissioned_work/downloads/KPMG_Econtech_Efficiency%20of%20Taxes_Final_Report.pdf)  
37  
38 (accessed 6 Dec 2017).  
39  
40  
41  
42  
43 40. Cao L, Hosking A, Kouparitsas M, et al. Understanding the economy-wide  
44  
45 efficiency and incidence of major Australian taxes. 2015. Available from:  
46  
47 <http://www.apo.org.au/system/files/54294/apo-nid54294-99131.docx>  
48  
49 (accessed 6 Dec 2017).  
50  
51  
52  
53  
54 41. Murray C, Lopez A. The Global Burden of Disease: a comprehensive  
55  
56 assessment of mortality & disability from diseases, injuries & risk factors in  
57  
58  
59  
60

- 1  
2  
3 1990 & projected to 2020, Volume 1, Global Burden of Disease & Injury  
4  
5 Series, Harvard: Harvard School of Public Health. 1996  
6  
7  
8  
9 42. Stouthard, ME, Essink-Bot, ML, Bonsel GJ, et al. Disability weights for diseases  
10  
11 in the Netherlands. Rotterdam, The Netherlands: Department of Public  
12  
13 Health, Erasmus University; 1997.  
14  
15  
16  
17 43. Cole MG, Ciampi A, Belzile E, et al. Persistent delirium in older hospital  
18  
19 patients: a systematic review of frequency and prognosis. *Age Ageing*.  
20  
21 2009;28(1):19-26.  
22  
23  
24  
25 44. Department of Prime Minister and Cabinet. Best practice regulation guidance  
26  
27 note: Value of statistical life. 2014. Available from:  
28  
29 [https://www.pmc.gov.au/sites/default/files/publications/Value\\_of\\_Statistical](https://www.pmc.gov.au/sites/default/files/publications/Value_of_Statistical_Life_guidance_note.pdf)  
30  
31 [\\_Life\\_guidance\\_note.pdf](https://www.pmc.gov.au/sites/default/files/publications/Value_of_Statistical_Life_guidance_note.pdf) (accessed 11 Dec 2017).  
32  
33  
34  
35 45. Brown L, Hansnata E, La, HA. Economic Cost of Dementia in Australia. 2017.  
36  
37 Available from:  
38  
39 [https://staff.dementia.org.au/files/NATIONAL/documents/The-economic-](https://staff.dementia.org.au/files/NATIONAL/documents/The-economic-cost-of-dementia-in-Australia-2016-to-2056.pdf)  
40  
41 [cost-of-dementia-in-Australia-2016-to-2056.pdf](https://staff.dementia.org.au/files/NATIONAL/documents/The-economic-cost-of-dementia-in-Australia-2016-to-2056.pdf) (accessed 6 Dec 2017).  
42  
43  
44  
45 46. Australian Institute of Health and Welfare. Australian burden of disease  
46  
47 study: Impacts and causes of illness and death in Australia 2011. 2016; AIHW  
48  
49 Australian burden of disease study series no. 3. BOD 4. Available from:  
50  
51 [https://www.aihw.gov.au/getmedia/d4df9251-c4b6-452f-a877-](https://www.aihw.gov.au/getmedia/d4df9251-c4b6-452f-a877-8370b6124219/19663.pdf.aspx?inline=true)  
52  
53 [8370b6124219/19663.pdf.aspx?inline=true](https://www.aihw.gov.au/getmedia/d4df9251-c4b6-452f-a877-8370b6124219/19663.pdf.aspx?inline=true) (accessed 6 Dec 2017).  
54  
55  
56  
57  
58  
59  
60

- 1  
2  
3 47. Lundström M, Edlund A, Bucht G, et al. Dementia after delirium in patients  
4  
5 with femoral neck fractures. *J Am Geriatr Soc*. 2003 Jul 1;51(7):1002-1006.  
6  
7  
8
- 9 48. Davis DH, Muniz Terrera G, Keage H, et al. Delirium is a strong risk factor for  
10  
11 dementia in the oldest-old: a population-based cohort study. *Brain*. 2012 Aug  
12  
13 9;135(9):2809-2816.  
14  
15  
16
- 17 49. Rockwood KE, Cosway S, Carver D, et al. The risk of dementia and death after  
18  
19 delirium. *Age Ageing*. 1999 Oct 1;28(6):551-556.  
20  
21  
22
- 23 50. Organisation for Economic Cooperation and Development. Purchasing power  
24  
25 parities (PPP). 2018; Available from:  
26  
27 <https://data.oecd.org/conversion/purchasing-power-parities-ppp.htm>  
28  
29 (accessed 15 June 2018).  
30  
31  
32
- 33 51. Dasgupta M, Hillier L. Factors associated with prolonged delirium: a  
34  
35 systematic review. *Int Psychogeriatr*. 2010;22(3):373-394.  
36  
37  
38
- 39 52. Livingston G, Sommerlad A, Orgeta V, et al. Dementia prevention,  
40  
41 intervention, and care. *Lancet*. 2017;390(10113):2673-734.  
42  
43 [dx.doi.org/10.1016/S0140-6736\(17\)31363-6](https://doi.org/10.1016/S0140-6736(17)31363-6) [published online first: 20 Jul  
44  
45 2017].  
46  
47  
48
- 49 53. Deloitte Access Economics. The economic value of informal care in Australia  
50  
51 in 2015, 2015 Jun; Available from:  
52  
53 [http://www.carersaustralia.com.au/storage/Access%20Economics%20Report](http://www.carersaustralia.com.au/storage/Access%20Economics%20Report.pdf)  
54  
55  
56  
57  
58  
59  
60 .pdf (accessed 20 Dec 2017).



Figure 1 Costs of delirium and dementia due to delirium in Australia in 2016-17, £ million

174x90mm (300 x 300 DPI)



1  
2  
3  
4  
5  
6  
7  
8  
9  
10  
11  
12  
13  
14  
15  
16  
17  
18  
19  
20  
21  
22  
23  
24  
25  
26  
27  
28  
29  
30  
31  
32  
33  
34  
35  
36  
37  
38  
39  
40  
41  
42  
43  
44  
45  
46  
47  
48  
49  
50  
51  
52  
53  
54  
55  
56  
57  
58  
59  
60

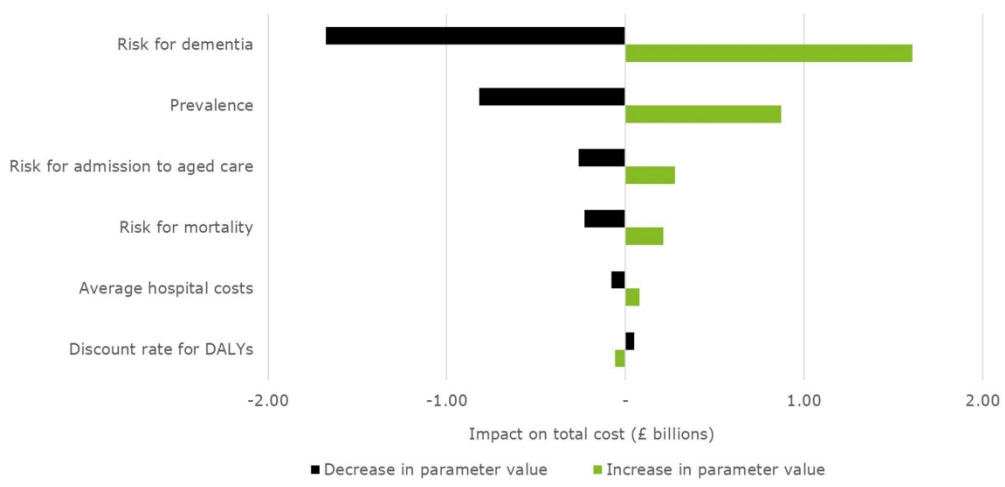

Figure 2 Sensitivity analysis (tornado diagram) showing the impact of key parameter inputs on the total cost of delirium in Australia in 2016-17

180x90mm (300 x 300 DPI)

The economic impact of delirium in Australia in 2016-17: a cost of illness study

**Additional File 1. Supplementary methods**

|   |          |                                                     |    |
|---|----------|-----------------------------------------------------|----|
| 1 | <b>1</b> | <b>CHEERS checklist</b> .....                       | 2  |
| 2 | <b>2</b> | <b>Literature review strategy</b> .....             | 4  |
| 3 | <b>3</b> | <b>Epidemiology</b> .....                           | 5  |
| 4 | 3.1      | Prevalence in episodes of acute hospital care ..... | 5  |
| 5 | 3.2      | Duration of delirium episodes.....                  | 6  |
| 6 | 3.3      | Mortality associated with delirium .....            | 7  |
| 7 | <b>4</b> | <b>Hospital expenditure</b> .....                   | 9  |
| 8 | <b>5</b> | <b>Informal care costs</b> .....                    | 11 |
| 9 | <b>6</b> | <b>References</b> .....                             | 12 |

For peer review only

## The economic impact of delirium in Australia in 2016-17: a cost of illness study

## 10 1 CHEERS checklist

## 11 CHEERS checklist

| Section/item                                           | Item No | Recommendation                                                                                                                                                                                                                                                                                                              | Reported on page No/line No                                  |
|--------------------------------------------------------|---------|-----------------------------------------------------------------------------------------------------------------------------------------------------------------------------------------------------------------------------------------------------------------------------------------------------------------------------|--------------------------------------------------------------|
| <b>Title and abstract</b>                              |         |                                                                                                                                                                                                                                                                                                                             |                                                              |
| Title                                                  | 1       | Identify the study as an economic evaluation or use more specific terms such as “cost-effectiveness analysis”, and describe the interventions compared.                                                                                                                                                                     | Page 1, line 3.                                              |
| Abstract                                               | 2       | Provide a structured summary of objectives, perspective, setting, methods (including study design and inputs), results (including base case and uncertainty analyses), and conclusions.                                                                                                                                     | Page 2, line 1-26.                                           |
| <b>Introduction</b>                                    |         |                                                                                                                                                                                                                                                                                                                             |                                                              |
| Background and objectives                              | 3       | Provide an explicit statement of the broader context for the study.                                                                                                                                                                                                                                                         | Page 4, line 43-74.                                          |
|                                                        |         | Present the study question and its relevance for health policy or practice decisions.                                                                                                                                                                                                                                       | Page 5, line 71-81.                                          |
| <b>Methods</b>                                         |         |                                                                                                                                                                                                                                                                                                                             |                                                              |
| Target population and subgroups                        | 4       | Describe characteristics of the base case population and subgroups analysed, including why they were chosen.                                                                                                                                                                                                                | Page 6, line 102-104.                                        |
| Setting and location                                   | 5       | State relevant aspects of the system(s) in which the decision(s) need(s) to be made.                                                                                                                                                                                                                                        | Page 6, line 94-101.                                         |
| Study perspective                                      | 6       | Describe the perspective of the study and relate this to the costs being evaluated.                                                                                                                                                                                                                                         | Page 6, line 92-93.                                          |
| Comparators                                            | 7       | Describe the interventions or strategies being compared and state why they were chosen.                                                                                                                                                                                                                                     | Not applicable. No interventions or strategies are compared. |
| Time horizon                                           | 8       | State the time horizon(s) over which costs and consequences are being evaluated and say why appropriate.                                                                                                                                                                                                                    | Page 6, line 92-93.                                          |
| Discount rate                                          | 9       | Report the choice of discount rate(s) used for costs and outcomes and say why appropriate.                                                                                                                                                                                                                                  | Page 12, line 236-238.                                       |
| Choice of health outcomes                              | 10      | Describe what outcomes were used as the measure(s) of benefit in the evaluation and their relevance for the type of analysis performed.                                                                                                                                                                                     | Page 6, line 94-101.                                         |
| Measurement of effectiveness                           | 11a     | <i>Single study-based estimates:</i> Describe fully the design features of the single effectiveness study and why the single study was a sufficient source of clinical effectiveness data.                                                                                                                                  | Not applicable. No interventions are considered.             |
|                                                        | 11b     | <i>Synthesis-based estimates:</i> Describe fully the methods used for identification of included studies and synthesis of clinical effectiveness data.                                                                                                                                                                      | Not applicable. No interventions are considered.             |
| Measurement and valuation of preference based outcomes | 12      | If applicable, describe the population and methods used to elicit preferences for outcomes.                                                                                                                                                                                                                                 | Not applicable. No interventions are considered.             |
| Estimating resources and costs                         | 13a     | <i>Single study-based economic evaluation:</i> Describe approaches used to estimate resource use associated with the alternative interventions. Describe primary or secondary research methods for valuing each resource item in terms of its unit cost. Describe any adjustments made to approximate to opportunity costs. | Page 9, line 161-248.                                        |
|                                                        | 13b     | <i>Model-based economic evaluation:</i> Describe approaches and data sources used to estimate resource use associated with model health states. Describe primary or secondary research methods for valuing each resource item in terms of its unit cost. Describe any adjustments made to approximate to opportunity costs. | Not applicable.                                              |

## The economic impact of delirium in Australia in 2016-17: a cost of illness study

| Section/item                                                         | Item No | Recommendation                                                                                                                                                                                                                                                                                                                                        | Reported on page No/line No                     |
|----------------------------------------------------------------------|---------|-------------------------------------------------------------------------------------------------------------------------------------------------------------------------------------------------------------------------------------------------------------------------------------------------------------------------------------------------------|-------------------------------------------------|
| Currency, price date, and conversion                                 | 14      | Report the dates of the estimated resource quantities and unit costs. Describe methods for adjusting estimated unit costs to the year of reported costs if necessary. Describe methods for converting costs into a common currency base and the exchange rate.                                                                                        | Page 7, line 169-248.<br>Page 13, line 256-259. |
| Choice of model                                                      | 15      | Describe and give reasons for the specific type of decision-analytical model used. Providing a figure to show model structure is strongly recommended.                                                                                                                                                                                                | Not applicable for cost of illness studies.     |
| Assumptions                                                          | 16      | Describe all structural or other assumptions underpinning the decision-analytical model.                                                                                                                                                                                                                                                              | Not applicable for cost of illness studies.     |
| Analytical methods                                                   | 17      | Describe all analytical methods supporting the evaluation. This could include methods for dealing with skewed, missing, or censored data; extrapolation methods; methods for pooling data; approaches to validate or make adjustments (such as half cycle corrections) to a model; and methods for handling population heterogeneity and uncertainty. | Page 5, line 82-248.                            |
| <b>Results</b>                                                       |         |                                                                                                                                                                                                                                                                                                                                                       |                                                 |
| Study parameters                                                     | 18      | Report the values, ranges, references, and, if used, probability distributions for all parameters. Report reasons or sources for distributions used to represent uncertainty where appropriate. Providing a table to show the input values is strongly recommended.                                                                                   | Page 5, line 82-248.                            |
| Incremental costs and outcomes                                       | 19      | For each intervention, report mean values for the main categories of estimated costs and outcomes of interest, as well as mean differences between the comparator groups. If applicable, report incremental cost-effectiveness ratios.                                                                                                                | Not applicable for cost of illness studies.     |
| Characterising uncertainty                                           | 20a     | <i>Single study-based economic evaluation:</i> Describe the effects of sampling uncertainty for the estimated incremental cost and incremental effectiveness parameters, together with the impact of methodological assumptions (such as discount rate, study perspective).                                                                           | Page 19, line 352-361.                          |
|                                                                      | 20b     | <i>Model-based economic evaluation:</i> Describe the effects on the results of uncertainty for all input parameters, and uncertainty related to the structure of the model and assumptions.                                                                                                                                                           | Not applicable for cost of illness studies.     |
| Characterising heterogeneity                                         | 21      | If applicable, report differences in costs, outcomes, or cost-effectiveness that can be explained by variations between subgroups of patients with different baseline characteristics or other observed variability in effects that are not reducible by more information.                                                                            | Not applicable.                                 |
| <b>Discussion</b>                                                    |         |                                                                                                                                                                                                                                                                                                                                                       |                                                 |
| Study findings, limitations, generalisability, and current knowledge | 22      | Summarise key study findings and describe how they support the conclusions reached. Discuss limitations and the generalisability of the findings and how the findings fit with current knowledge.                                                                                                                                                     | Page 20, line 362-431.                          |
| <b>Other</b>                                                         |         |                                                                                                                                                                                                                                                                                                                                                       |                                                 |
| Source of funding                                                    | 23      | Describe how the study was funded and the role of the funder in the identification, design, conduct, and reporting of the analysis. Describe other non-monetary sources of support.                                                                                                                                                                   | Page 25, line 454.                              |
| Conflicts of interest                                                | 24      | Describe any potential for conflict of interest of study contributors in accordance with journal policy. In the absence of a journal policy, we recommend authors comply with International Committee of Medical Journal Editors recommendations.                                                                                                     | Page 24, line 452.                              |

## The economic impact of delirium in Australia in 2016-17: a cost of illness study

**2 Literature review strategy**

A targeted rather than systematic literature review was performed to identify relevant articles with the purpose of identifying the prevalence of delirium within hospital settings and in residential aged care facilities, the duration of delirium, and mortality due to delirium. The review also identified literature relevant to costs of delirium, including health system, productivity, and wellbeing impacts. Keywords were restricted to the title and abstract for searches conducted on PubMed.

1. ("delirium"[tiab] OR "cognitive impairment"[tiab] OR "acute confusion"[tiab]) AND Meta-Analysis[ptyp].
2. ("delirium"[tiab] OR "cognitive impairment"[tiab] OR "acute confusion"[tiab]) AND "Australia"[pl].
3. ("epidemiology"[MH] OR "mortality"[MH] OR "incidence"[MH] OR "prevalence"[MH] OR "duration"[tiab] OR "persistence"[tiab]) AND ("delirium"[tiab] OR "cognitive impairment"[tiab] OR "acute confusion"[tiab])).
4. 3 AND "Australia"[pl].
5. 3 AND "Australia"[pl] AND ("hospital"[tiab] OR "aged care"[tiab] OR "nursing home"[tiab]).
6. ("cost"[tiab] OR "economic"[tiab] OR "productivity"[tiab] OR "workforce"[tiab] OR "health use"[tiab] OR "utilization"[tiab]) AND ("delirium"[tiab] OR "cognitive impairment"[tiab] OR "acute confusion"[tiab]).
7. 5 and "Australia"[pl].
8. ("burden"[tiab] OR "disability"[tiab] OR "death"[tiab] OR "quality of life"[tiab]) AND ("delirium"[tiab] OR "cognitive impairment"[tiab] OR "acute confusion"[tiab]).
9. 7 AND "Australia"[pl].

## The economic impact of delirium in Australia in 2016-17: a cost of illness study

34 **3 Epidemiology**

35 A targeted rather than systematic literature review was performed to identify relevant articles with  
 36 the purpose of identifying the prevalence of delirium within hospital settings and in residential aged  
 37 care facilities, the duration of delirium, and mortality due to delirium.

38 **3.1 Prevalence in episodes of acute hospital care**

39 Results from the literature search were pooled to estimate an average prevalence that can be  
 40 applied to Australian hospital separations<sup>a</sup>. The studies, characteristics and pooled results are shown  
 41 in Table 1. Studies were pooled using weights based on the sample size.

42 **Table 1: Occurrence rates of delirium**

| Author, year                                      | Country     | Sample restrictions                     | Sample size | Mean age (SD) | Assessment frequency                                              | Occurrence/prevalence (%) |
|---------------------------------------------------|-------------|-----------------------------------------|-------------|---------------|-------------------------------------------------------------------|---------------------------|
| <b>Sources cited in Siddiqi et al<sup>4</sup></b> |             |                                         |             |               |                                                                   |                           |
| Braekhus 1994                                     | Norway      | > 75 years                              | 58          | 83.1          | Every 3 days                                                      | 24.1                      |
| Cameron 1987                                      | US          | No age restriction                      | 133         | 68.8          | On request                                                        | 15.0                      |
| Feldman 1999                                      | Israel      | >70 years, admissions to geriatric unit | 61          | 83.2 (6.8)    | Every 2 days for 14 days, intermittently until discharge or death | 18.0                      |
| Jitapunkul 1992                                   | UK          | Admissions to geriatric unit            | 184         | 81.7 (6.6)    | At admission, 1 week, discharge and case record review            | 21.7                      |
| Johnson 1990                                      | US          | >70 years                               | 235         | 78 (6.0)      | Within 24 hours and every day                                     | 20.4                      |
| O'Keefe 1996                                      | Ireland     | No age restriction                      | 225         | 82 (4.0)      | Within 24 hours and every 2 days                                  | 41.8                      |
| Rockwood 1989                                     | Canada      | Elderly                                 | 80          | 76.8          | Daily                                                             | 25.0                      |
| Rockwood 1993                                     | Canada      | Admissions to geriatric unit            | 168         | 79 (8.0)      | At admission, timing not clear                                    | 25.6                      |
| Seymour 1980                                      | Canada      | >70 years                               | 68          | 81.2          | Within 4 hours, weekly                                            | 16.2                      |
| Zanocchi 1998                                     | Italy       | Admissions to geriatric unit            | 585         | 77.1          | Twice-daily                                                       | 22.2                      |
| Total/weighted average                            |             |                                         | 1,797       | 80.3 (4.4)    |                                                                   | 24.0                      |
| <b>Recent point-prevalence/occurrence studies</b> |             |                                         |             |               |                                                                   |                           |
| McAvay, 2006 <sup>7</sup>                         | US          | >70 years                               | 433         | 79.8 (6.3)    | Daily                                                             | 12.7                      |
| Holden, 2008 <sup>8</sup>                         | New Zealand | >65 years                               | 216         | 79.3          | Every 2 days until discharge                                      | 29.1                      |

<sup>a</sup> Three studies from Siddiqi et al<sup>4</sup> were removed from the analysis. Two of the studies were restricted to a sample of patients who were admitted from community dwellings,<sup>5,6</sup> while one study was removed because there were insufficient details to assess the methods were appropriate as the full text article was not available in English.<sup>7</sup>

## The economic impact of delirium in Australia in 2016-17: a cost of illness study

| Author, year                | Country   | Sample restrictions                      | Sample size  | Mean age (SD)     | Assessment frequency                                 | Occurrence/prevalence (%) |
|-----------------------------|-----------|------------------------------------------|--------------|-------------------|------------------------------------------------------|---------------------------|
| McCusker, 2003 <sup>9</sup> | Canada    | >65 years                                | 1,552        | 83.6 (7.4)        | -                                                    | 22.3                      |
| Inouye, 1998 <sup>10</sup>  | US        | >65 years, medical and surgical patients | 107          | -                 | Admission and discharge                              | 25.0                      |
| Jones, 2006 <sup>11</sup>   | US        | >70 years                                | 491          | 79.0 (6.0)        | Daily                                                | 22.0                      |
| Inouye, 1998 <sup>10</sup>  | US        | >65 years, medical and surgical patients | 174          | -                 | Admission and discharge                              | 15.0                      |
| Ryan 2013 <sup>12</sup>     | Ireland   | Adults, no restriction                   | 280          |                   | Point prevalence                                     | 17.6                      |
| Bellelli 2016 <sup>3</sup>  | Italy     | >65 years                                | 1,867        | 82 (7.4)          | Point prevalence                                     | 22.9                      |
| Meagher 2014 <sup>13</sup>  | Ireland   | Adults, no restriction                   | 311          | 76 (13.1)         | Point prevalence                                     | 16.7                      |
| Iseki 2007 <sup>14</sup>    | Australia | >65 years                                | 104          | 80.1 (7.0)        | At admission, follow up at 2-3 days, and then weekly | 21.0                      |
| Travers 2013 <sup>15</sup>  | Australia | >70 years                                | 493          | 80.4 (6.5)        | Daily                                                | 17.3                      |
| Speed 2007 <sup>16</sup>    | Australia | Adults, no restriction                   | 1,209        | 80.0              | Four point prevalence audits                         | 10.9                      |
| Total/weighted average      |           |                                          | 7,237        | 81.1 (7.4)        |                                                      | 19.2                      |
| <b>Overall</b>              |           |                                          | <b>9,034</b> | <b>80.9 (6.6)</b> |                                                      | <b>20.2</b>               |

Source: Based on Siddiqi et al<sup>4</sup> and sources as itemised in the table. Weighted averages are based on sample size.

### 3.2 Duration of delirium episodes

As delirium is a transient condition, it is important to estimate the average duration of an episode of delirium to calculate the burden imposed on society (Table 2).

Table 2: Duration of delirium

| Author, year                         | Country     | Sample restrictions                                                                                              | Sample size  | Age (SD)   | Duration (days) |
|--------------------------------------|-------------|------------------------------------------------------------------------------------------------------------------|--------------|------------|-----------------|
| Adamis, 2006 <sup>24</sup>           | England     | Elderly care unit; ≥70 years                                                                                     | 94           | 82.8 (6.5) | 8.6             |
| Andrew, 2005 <sup>25</sup>           | Canada      | Admissions to geriatric unit                                                                                     | 77           | 78.5 (7.2) | 6.3             |
| O'Keeffe, 1997 <sup>26</sup>         | Ireland     | Admissions to geriatric unit                                                                                     | 94           | 83.2 (6.8) | 7.0             |
| Pandharipande, 2013 <sup>27</sup>    | US          | Admissions to intensive care unit (ICU) with defined list of conditions; excluded those with recent ICU exposure | 606          | 61         | 4.0             |
| Rockwood, 1993 <sup>28</sup>         | Canada      | Admissions to geriatric unit, mostly admitted from community                                                     | 173          | 79 (8)     | 8.0             |
| Van den Boogaard, 2012 <sup>29</sup> | Netherlands | Admissions to ICU; excluded those admitted for < 1 day                                                           | 272          | 81.7 (6.6) | 2.0             |
| Cole, 2012 <sup>30</sup>             | Canada      | Long-term care residents                                                                                         | 279          | 87.4       | 11.3            |
| <b>Total/weighted average</b>        |             |                                                                                                                  | <b>1,595</b> |            | <b>5.9</b>      |

Source: sources as itemised in the table. The weighted averages were based on sample size.

## The economic impact of delirium in Australia in 2016-17: a cost of illness study

49 **3.3 Mortality associated with delirium**

50 Delirium is associated with higher rates of mortality in hospital settings, and a greater chance of  
 51 mortality occurring in the year following an episode of delirium. Mortality was estimated using an  
 52 attributable fraction approach based on literature. Witlox et al<sup>31</sup> reported an overall average  
 53 mortality rate of 38.0% compared to a rate of 27.5% with no delirium, which was a 1.4-fold increase  
 54 for those with delirium. The hazard ratio – indicating how much more likely someone with delirium  
 55 is to have died at any point in time – was estimated to be 1.95. The authors included seven studies  
 56 from the US, UK, Canada, Chile and Brazil. To estimate mortality associated with delirium for  
 57 Australia, the Chilean and Brazilian studies have been excluded from the analysis as they are  
 58 demographically less similar to Australia and there may be alternative drivers of mortality in those  
 59 countries. The hazard ratio was re-estimated by meta-analysis using a random effects model. The  
 60 final reweighted hazard ratio was estimated to be 1.77 (Table 3).

61 **Table 3: Mortality rates and hazard ratio for mortality**

| Author, year (as cited in Witlox et al <sup>31</sup> ) | Country | Subgroup         | Hazard ratio for mortality (95% confidence interval) |
|--------------------------------------------------------|---------|------------------|------------------------------------------------------|
| Gonzalez et al 2009                                    | Chile   | General medical  | 4.04 (2.19 – 7.46)                                   |
| Furlaneto and Garcez-Leme 2007                         | Brazil  | Femoral fracture | 1.28 (0.66 – 2.48)                                   |
| Leslie et al 2005                                      | US      | General medical  | 1.62 (1.13 – 2.33)                                   |
| McCusker et al, 2002                                   | Canada  | General medical  | 2.16 (1.06 – 4.41)                                   |
| Nightingale et al, 2001                                | UK      | Hip fracture     | 2.40 (1.66 – 3.48)                                   |
| Rockwood et al, 1999                                   | Canada  | General medical  | 1.80 (1.11 – 2.92)                                   |
| Francis and Kapoor, 1992                               | US      | General medical  | 1.40 (0.79 – 2.48)                                   |
| <b>Pooled estimate</b>                                 |         |                  | <b>1.95 (1.51 – 2.52)</b>                            |
| <b>Reweighted estimate</b>                             |         |                  | <b>1.77 (1.39 – 2.15)</b>                            |

62 **Source:** Based on Witlox et al<sup>31</sup>

63 The hazard ratio (1.77) based on data from Witlox et al<sup>31</sup> was applied to general population mortality  
 64 rates, including the 1.4-fold increase for mortality for people who had delirium, for the respective  
 65 age groups to estimate the number of deaths associated with delirium in 2016-17. It was expected  
 66 that 12,571 people who had delirium would die in 2016-17, noting not all mortality is due to delirium  
 67 itself (e.g. comorbid dementia or other illness may contribute to both delirium and death). Deaths



## The economic impact of delirium in Australia in 2016-17: a cost of illness study

1  
2  
3 68 due to delirium were estimated by applying the population attributable fraction to total deaths in  
4  
5 69 the delirium cohort in 2016-17.<sup>b</sup>  
6  
7  
8  
9  
10  
11  
12  
13  
14  
15  
16  
17  
18  
19  
20  
21  
22  
23  
24  
25  
26  
27  
28  
29  
30  
31  
32  
33  
34  
35  
36  
37  
38  
39  
40  
41  
42  
43  
44  
45  
46  
47  
48  
49  
50  
51  
52  
53  
54  
55  
56  
57

---

<sup>b</sup> The formula to estimate the number of deaths attributable to delirium is as follows:

*Population attributable fraction* =  $\frac{P.(HR-1)}{P.(HR-1)+1}$ , where P equals the prevalence rate for each age group, and HR equals the hazard ratio. The population attributable fraction is then multiplied by the total number of deaths that occur in people with delirium.

## The economic impact of delirium in Australia in 2016-17: a cost of illness study

70 **4 Hospital expenditure**

71 Hospital expenditure data in Australia includes general public and private hospital admissions. The  
72 literature shows that delirium results in functional decline, resulting in a longer length of stay (LOS)  
73 for hospital patients, consequently leading to higher hospitalisation expenditure.

74 To establish the incremental change in LOS for hospital patients with delirium, a targeted review of  
75 the relevant literature was conducted for studies that are demographically similar to Australia and  
76 that assessed outcomes for patients admitted to general medical wards.

77 The results of these studies were weighted by sample size to estimate the additional LOS for people  
78 with delirium. On average, the LOS for people with delirium was estimated to be 24.2 days rather  
79 than 16.7 days in the control groups, a difference of 7.5 days (Table 4). Additional studies were used  
80 to estimate the proportion of additional days that are due to delirium after controlling for  
81 confounding factors. When additional factors are controlled for, including the baseline  
82 characteristics of patients, delirium accounts for 36% of the additional days, as shown in Table 5. As  
83 such, we estimate that delirium increases the average LOS by 2.7 days.

## The economic impact of delirium in Australia in 2016-17: a cost of illness study

84 Table 4: Additional LOS associated with delirium

| Author, year                    | Country     | Sample characteristics                        | Sample size  | Difference in LOS |
|---------------------------------|-------------|-----------------------------------------------|--------------|-------------------|
| Alexander, 2016 <sup>32</sup>   | UK          | Admissions to general hospital                | 590          | 6.0               |
| Emond, 2017 <sup>33</sup>       | Canada      | Admissions to ICU; ≥ 65 years                 | 200          | 8.6               |
| Gaudet, 1993 <sup>34</sup>      | France      | Admissions to geriatric unit                  | 487          | 18.0              |
| Jitapunkul, 1992 <sup>35</sup>  | UK          | Admissions to acute geriatric ward; ≥60 years | 184          | 4.0               |
| Kolbeinsson, 1993 <sup>36</sup> | Iceland     | Admissions to emergency ward; ≥70 years       | 272          | 2.9               |
| McCusker, 2003 <sup>37</sup>    | Canada      | Acute care; ≥65 years                         | 359          | 3.6               |
| O'Keeffe, 1997 <sup>26</sup>    | Ireland     | Admissions to geriatric unit                  | 225          | 10.0              |
| Ramsay, 1991 <sup>38</sup>      | UK          | Admissions to acute geriatric ward            | 119          | -1.9              |
| Rockwood, 1993 <sup>28</sup>    | Canada      | Admissions to geriatric unit                  | 173          | 4.0               |
| Stevens, 1998 <sup>39</sup>     | Australia   | Admissions to general medical                 | 84           | 12                |
| Tan, 2015 <sup>40</sup>         | New Zealand | >65 years                                     | 250          | 3.8               |
| Thomas, 1988 <sup>41</sup>      | US          | Admissions to general medical ward            | 133          | 11.0              |
| <b>Total / weighted average</b> |             |                                               | <b>3,076</b> | <b>7.5</b>        |

85 Source: as itemised in table.

86 Table 5: Adjusted and unadjusted difference in LOS due to delirium

| Author, year                    | Country | Sample characteristics        | Sample size  | Unadjusted difference | Adjusted difference | Relativity  |
|---------------------------------|---------|-------------------------------|--------------|-----------------------|---------------------|-------------|
| Emond, 2017 <sup>33</sup>       | Canada  | Admissions to ICU; ≥ 65 years | 200          | 8.6                   | 8.4                 | 0.98        |
| Inouye, 1998 <sup>10</sup>      | US      | ≥65 years                     | 727          | 1.2                   | 0.5                 | 0.42        |
| McCusker, 2003 <sup>37</sup>    | Canada  | Acute care; ≥65 years         | 359          | 4.5                   | 0.5                 | 0.10        |
| O'Keeffe, 1997 <sup>26</sup>    | Ireland | Admissions to geriatric unit  | 225          | 10.0                  | 0.7                 | 0.07        |
| <b>Total / weighted average</b> |         |                               | <b>1,511</b> | <b>4.3</b>            | <b>1.5</b>          | <b>0.36</b> |

87 Source: as itemised in table.

## The economic impact of delirium in Australia in 2016-17: a cost of illness study

88 **5 Informal care costs**

89 Carers are people who provide care to others in need of assistance or support. An informal carer  
90 provides this service without formal payment and does so outside of the formal care sector. An  
91 informal carer will typically be a family member or friend of the person receiving care, and usually  
92 lives in the same household as the recipient of care.

93 Bellelli et al<sup>55</sup> found that 26.2% of patients who developed delirium during their hospital stay  
94 required assistance from paid caregivers following discharge. The rate of paid caregiving was  
95 assumed to be comparable to informal care in Australia as the care is usually provided by family  
96 members. In order to estimate the number of care recipients for Australia, 26.2% was applied to the  
97 prevalence of delirium for people who are 65 years or older and who live in the community (total  
98 adjusted prevalence – prevalence in aged care). Therefore, it was estimated that 20,741 people  
99 would require care due to delirium in Australia in 2016-17. People with delirium required assistance  
100 with an additional 0.36 activities of daily living over a period of 12 months.<sup>56,57</sup>

101 Analysis of the Survey of Disability, Ageing and Carers,<sup>58</sup> revealed an almost linear trend, such that  
102 an additional 2.57 hours of care were provided per week for each additional activity on average.<sup>c</sup> As  
103 such, each person would receive 0.9 additional hours of care per week or 47.6 hours of care  
104 throughout the year.

105 The carer's opportunity cost of time was calculated based on the weighted average weekly  
106 earnings<sup>54</sup> and the chance of being employed.<sup>53</sup>

---

<sup>c</sup> Care needs would likely depend on the type of activity for which help is required; however there was insufficient evidence to determine which activities are most influenced by delirium.

## The economic impact of delirium in Australia in 2016-17: a cost of illness study

**6 References**

1. Bellelli G, Morandi A, Di Santo SG, et al. "Delirium Day": a nationwide point prevalence study of delirium in older hospitalized patients using an easy standardized diagnostic tool. *BMC Med.* 2016; 14(1): 106-117.
2. Siddiqi N, House AO, Holmes JD. Occurrence and outcome of delirium in medical in-patients: a systematic literature review. *Age and ageing.* 2006; 35(4): 350-364.
3. Bourdel-Marchasson I, Vincent S, Germain, C, et al. Delirium symptoms and low dietary intake in older inpatients are independent predictors of institutionalization: a 1-year prospective population-based study. *J Gerontol A Biol Sci Med Sci.* 2004; 59(4): M350-M354.
4. Francis J, Kapoor WN. Delirium in hospitalized elderly. *J Gen Intern Med.* 1990; 5(1): 65-79.
5. McAvay GJ, Van Ness PH, Bogardus ST, et al. Older adults discharged from the hospital with delirium: 1-year outcomes. *J Am Geriatr Soc.* 2006; 54(8): 1245-1250.
6. Holden J, Jayathissa S, Young G. Delirium among elderly general medical patients in a New Zealand hospital. *Intern Med.* 2008; 38(8): 629-634.
7. McCusker J, Cole MG, Voyer P, et al. Prevalence and incidence of delirium in long-term care. *Int J Geriatr Psychiatry.* 2011; 26(11): 1152-1161.
8. Inouye, SK, Rushing JT, Foreman MD, et al. Does delirium contribute to poor hospital outcomes? *J Gen Intern Med.* 1998; 13(4): 234-242.
9. Jones RN, Yang FM, Zhang Y, et al. Does educational attainment contribute to risk for delirium? A potential role for cognitive reserve. *J Gerontol A Biol Sci Med Sci.* 2006; 61(12): 1307-1311.
10. Ryan DJ, O'Regan NA, Caoimh RÓ, et al. Delirium in an adult acute hospital population: predictors, prevalence and detection. *BMJ Open.* 2013; 3(1): e001772, doi: 10.1136/bmjopen-2012-001772.
11. Meagher D, O'Regan N, Ryan D, et al. Frequency of delirium and subsyndromal delirium in an adult acute hospital population. *Br J Psychiatry.* 2014; 205(6): 478-485.
12. Iseli RK, Brand C, Telford M, et al. Delirium in elderly general medical inpatients: a prospective study. *Intern Med J.* 2007; 37(12): 806-811.
13. Travers C, Byrne G, Pachana N, et al. Prospective observational study of dementia and delirium in the acute hospital setting. *Intern Med J.* 2013; 43(3): 262-269.
14. Speed G, Wynaden D, McGowan S, et al. Prevalence rate of delirium at two hospitals in Western Australia. *Aust J Adv Nurs.* 2007; 25(1): 38-43.
15. Adamis D, Treloar A, Martin FC, et al. Recovery and outcome of delirium in elderly medical inpatients. *Arch Gerontol Geriatr.* 2006; 43: 289-298.

## The economic impact of delirium in Australia in 2016-17: a cost of illness study

16. Andrew, MK, Freter SH, Rockwood, K. Incomplete functional recovery after delirium in elderly people: a prospective cohort study. *BMC Geriatr.* 2005; 5(1): 5.
17. O'Keeffe S, Lavan J. The prognostic significance of delirium in older hospital patients. *J Am Geriatr Soc.* 1997; 45(2): 174-178.
18. Pandharipande PP, Girard TD, Jackson JC, et al. Long-term cognitive impairment after critical illness. *N Engl J Med.* 2013; 369(14): 1306-1316.
19. Rockwood K. The occurrence and duration of symptoms in elderly patients with delirium. *J Gerontol.* 1993; 48(4)L: M162-M166.
20. van den Boogaard M, Schoonhoven L, Evers AW, et al. Delirium in critically ill patients: impact on long-term health-related quality of life and cognitive functioning. *Crit Care Med.* 2012; 40(1): 112-118.
21. Cole MG, McCusker J, Voyer P, et al. The course of delirium in older long-term care residents. *Intern J Geriatric Psychiatry.* 2012; 27(12): 1291-1297.
22. Witlox J, Eurelings LS, de Jonghe JF, et al. Delirium in elderly patients and the risk of postdischarge mortality, institutionalization, and dementia: a meta-analysis. *Jama.* 2010; 304(4): 443-451.
23. Alexander K, Adamson J, Cunningham C, et al. The effect of delirium and dementia on length of stay (LOS) and functional recovery of patients in elderly medical wards. *Physiotherapy.* 2016; 102: e180-e181.
24. Émond M, Grenier D, Morin J, et al. Emergency department stay associated delirium in older patients. *Can Geriatr J.* 2017; 20(1): 10.
25. Gaudet MP, Pfitzenmeyer B, Tavernier-Vidal, et al. Les états confusionnels en milieu interniste gériatrique court séjour. *Psychol Méd.* 1993; 25(7): 611-614.
26. Jitapunkul S, Pillay I, Ebrahim S. Delirium in newly admitted elderly patients: a prospective study. *QJM: Intern J Med.* 1992; 83(1): 307-314.
27. Kolbeinsson H, Jonsson A. Delirium and dementia in acute medical admissions of elderly patients in Iceland. *Acta Psychiatr Scand.* 1993; 87(2): 123-127.
28. McCusker J, Cole, MG, Dendukuri N, et al. Does delirium increase hospital stay? *J Am Geriatr Soc.* 2003; 51(11): 1539-1546.
29. Ramsay R, Wright P, Katz A, et al. The detection of psychiatric morbidity and its effects on outcome in acute elderly medical admissions. *Intern J Geriatr Psychiatry.* 1991; 6(12): 861-866.
30. Stevens LE, de Moore GM, Simpson JM. Delirium in hospital: does it increase length of stay?. *Aust N Z J Psychiatry.* 1998 Dec;32(6):805-808.
31. Tan AH, Scott J. Association of point prevalence diagnosis of delirium on length of stay, 6-month mortality, and level of care on discharge at Waitemata District Health Board, Auckland. *N Z Med J.* 2015 Mar;128(1411):68-76.

## The economic impact of delirium in Australia in 2016-17: a cost of illness study

- 1  
2  
3  
4  
5  
6  
7  
8  
9  
10  
11  
12  
13  
14  
15  
16  
17  
18  
19  
20  
21  
22  
23  
24  
25  
26  
27  
28  
29  
30  
31  
32  
33  
34  
35  
36  
37  
38  
39  
40  
41  
42  
43  
44  
45  
46  
47  
48  
49  
50  
51  
52  
53  
54  
55  
56  
57  
58  
59  
60
32. Thomas RI, Cameron DJ, Fahs MC. A prospective study of delirium and prolonged hospital stay: exploratory study. *Arch Gen Psychiatry*. 1988 Oct 1;45(10):937-940.
33. Australian Bureau of Statistics. Labour Force, Australia, Jun 2016, Cat. No. 6202.0 [Internet]. 2016 Jul 14 [cited 2017 Dec 11]. Available from: <http://www.abs.gov.au/AUSSTATS/abs@.nsf/DetailsPage/6202.0Jun%202016?OpenDocument>.
34. Australian Bureau of Statistics. Average Weekly Earnings, Australia, May 2017, Cat. No. 6302.0 [Internet]. 2017 Aug 17 [cited 2017 Dec 11]. Available from: <http://www.abs.gov.au/AUSSTATS/abs@.nsf/Lookup/6302.0Main+Features1May%202017?OpenDocument>.
35. Bellelli G, Bianchetti A, Trabucchi M. Delirium and costs of informal home care. *Arch Int Med*. 2008 Aug 11;168(15):1717.
36. Vida S, du Fort GG, Kakuma R, et al. An 18-month prospective cohort study of functional outcome of delirium in elderly patients: activities of daily living. *Int Psychogeriatr*. 2006 Dec;18(4):681-700.
37. Murray AM, Levkoff SE, Wetle TT, et al. Acute delirium and functional decline in the hospitalized elderly patient. *J Gerontol*. 1993 Sep 1;48(5):M181-M186.
38. Australian Bureau of Statistics. Microdata: Disability, Ageing and Carers, Australia, 2015, Cat. No. 4430.0.30.002 [Internet]. 2016 Oct 18 [cited 2017 Dec 11]. Available from: <http://www.abs.gov.au/AUSSTATS/abs@.nsf/Lookup/4430.0.30.002Main+Features12015>.
