# Supplementary material for: Economic impact of delirium in Australia: a cost of illness study
Source: PubMed Central journal article supplement — BMJ Open. 2019 Sep 17;9(9):e027514. doi: 10.1136/bmjopen-2018-027514 (PMC6756419; doi:10.1136/bmjopen-2018-027514), 2019-09-17
Supplement: bmjopen-2018-027514supp001.pdf [file bmjopen-2018-027514supp001.pdf]

## The economic impact of delirium in Australia in 2016-17: a cost of illness study

**Additional File 1. Supplementary methods**

|   |          |                                                         |    |
|---|----------|---------------------------------------------------------|----|
| 1 | <b>1</b> | <b>CHEERS checklist</b> .....                           | 2  |
| 2 | <b>2</b> | <b>Literature review strategy</b> .....                 | 4  |
| 3 | <b>3</b> | <b>Epidemiology</b> .....                               | 5  |
| 4 |          | 3.1 Prevalence in episodes of acute hospital care ..... | 5  |
| 5 |          | 3.2 Duration of delirium episodes.....                  | 6  |
| 6 |          | 3.3 Mortality associated with delirium .....            | 7  |
| 7 | <b>4</b> | <b>Hospital expenditure</b> .....                       | 9  |
| 8 | <b>5</b> | <b>Informal care costs</b> .....                        | 11 |
| 9 | <b>6</b> | <b>References</b> .....                                 | 12 |

## The economic impact of delirium in Australia in 2016-17: a cost of illness study

## 10 1 CHEERS checklist

## 11 CHEERS checklist

| Section/item                                           | Item No | Recommendation                                                                                                                                                                                                                                                                                                               | Reported on page No/line No                                  |
|--------------------------------------------------------|---------|------------------------------------------------------------------------------------------------------------------------------------------------------------------------------------------------------------------------------------------------------------------------------------------------------------------------------|--------------------------------------------------------------|
| <b>Title and abstract</b>                              |         |                                                                                                                                                                                                                                                                                                                              |                                                              |
| Title                                                  | 1       | Identify the study as an economic evaluation or use more specific terms such as "cost-effectiveness analysis", and describe the interventions compared.                                                                                                                                                                      | Page 1, line 3.                                              |
| Abstract                                               | 2       | Provide a structured summary of objectives, perspective, setting, methods (including study design and inputs), results (including base case and uncertainty analyses), and conclusions.                                                                                                                                      | Page 2, line 1-26.                                           |
| <b>Introduction</b>                                    |         |                                                                                                                                                                                                                                                                                                                              |                                                              |
| Background and objectives                              | 3       | Provide an explicit statement of the broader context for the study.                                                                                                                                                                                                                                                          | Page 4, line 43-74.                                          |
|                                                        |         | Present the study question and its relevance for health policy or practice decisions.                                                                                                                                                                                                                                        | Page 5, line 71-81.                                          |
| <b>Methods</b>                                         |         |                                                                                                                                                                                                                                                                                                                              |                                                              |
| Target population and subgroups                        | 4       | Describe characteristics of the base case population and subgroups analysed, including why they were chosen.                                                                                                                                                                                                                 | Page 6, line 102-104.                                        |
| Setting and location                                   | 5       | State relevant aspects of the system(s) in which the decision(s) need(s) to be made.                                                                                                                                                                                                                                         | Page 6, line 94-101.                                         |
| Study perspective                                      | 6       | Describe the perspective of the study and relate this to the costs being evaluated.                                                                                                                                                                                                                                          | Page 6, line 92-93.                                          |
| Comparators                                            | 7       | Describe the interventions or strategies being compared and state why they were chosen.                                                                                                                                                                                                                                      | Not applicable. No interventions or strategies are compared. |
| Time horizon                                           | 8       | State the time horizon(s) over which costs and consequences are being evaluated and say why appropriate.                                                                                                                                                                                                                     | Page 6, line 92-93.                                          |
| Discount rate                                          | 9       | Report the choice of discount rate(s) used for costs and outcomes and say why appropriate.                                                                                                                                                                                                                                   | Page 12, line 236-238.                                       |
| Choice of health outcomes                              | 10      | Describe what outcomes were used as the measure(s) of benefit in the evaluation and their relevance for the type of analysis performed.                                                                                                                                                                                      | Page 6, line 94-101.                                         |
| Measurement of effectiveness                           | 11a     | <i>Single study-based estimates</i> : Describe fully the design features of the single effectiveness study and why the single study was a sufficient source of clinical effectiveness data.                                                                                                                                  | Not applicable. No interventions are considered.             |
|                                                        | 11b     | <i>Synthesis-based estimates</i> : Describe fully the methods used for identification of included studies and synthesis of clinical effectiveness data.                                                                                                                                                                      | Not applicable. No interventions are considered.             |
| Measurement and valuation of preference based outcomes | 12      | If applicable, describe the population and methods used to elicit preferences for outcomes.                                                                                                                                                                                                                                  | Not applicable. No interventions are considered.             |
| Estimating resources and costs                         | 13a     | <i>Single study-based economic evaluation</i> : Describe approaches used to estimate resource use associated with the alternative interventions. Describe primary or secondary research methods for valuing each resource item in terms of its unit cost. Describe any adjustments made to approximate to opportunity costs. | Page 9, line 161-248.                                        |
|                                                        | 13b     | <i>Model-based economic evaluation</i> : Describe approaches and data sources used to estimate resource use associated with model health states. Describe primary or secondary research methods for valuing each resource item in terms of its unit cost. Describe any adjustments made to approximate to opportunity costs. | Not applicable.                                              |

## The economic impact of delirium in Australia in 2016-17: a cost of illness study

| Section/item                                                         | Item No | Recommendation                                                                                                                                                                                                                                                                                                                                        | Reported on page No/ line No                    |
|----------------------------------------------------------------------|---------|-------------------------------------------------------------------------------------------------------------------------------------------------------------------------------------------------------------------------------------------------------------------------------------------------------------------------------------------------------|-------------------------------------------------|
| Currency, price date, and conversion                                 | 14      | Report the dates of the estimated resource quantities and unit costs. Describe methods for adjusting estimated unit costs to the year of reported costs if necessary. Describe methods for converting costs into a common currency base and the exchange rate.                                                                                        | Page 7, line 169-248.<br>Page 13, line 256-259. |
| Choice of model                                                      | 15      | Describe and give reasons for the specific type of decision-analytical model used. Providing a figure to show model structure is strongly recommended.                                                                                                                                                                                                | Not applicable for cost of illness studies.     |
| Assumptions                                                          | 16      | Describe all structural or other assumptions underpinning the decision-analytical model.                                                                                                                                                                                                                                                              | Not applicable for cost of illness studies.     |
| Analytical methods                                                   | 17      | Describe all analytical methods supporting the evaluation. This could include methods for dealing with skewed, missing, or censored data; extrapolation methods; methods for pooling data; approaches to validate or make adjustments (such as half cycle corrections) to a model; and methods for handling population heterogeneity and uncertainty. | Page 5, line 82-248.                            |
| <b>Results</b>                                                       |         |                                                                                                                                                                                                                                                                                                                                                       |                                                 |
| Study parameters                                                     | 18      | Report the values, ranges, references, and, if used, probability distributions for all parameters. Report reasons or sources for distributions used to represent uncertainty where appropriate. Providing a table to show the input values is strongly recommended.                                                                                   | Page 5, line 82-248.                            |
| Incremental costs and outcomes                                       | 19      | For each intervention, report mean values for the main categories of estimated costs and outcomes of interest, as well as mean differences between the comparator groups. If applicable, report incremental cost-effectiveness ratios.                                                                                                                | Not applicable for cost of illness studies.     |
| Characterising uncertainty                                           | 20a     | <i>Single study-based economic evaluation:</i> Describe the effects of sampling uncertainty for the estimated incremental cost and incremental effectiveness parameters, together with the impact of methodological assumptions (such as discount rate, study perspective).                                                                           | Page 19, line 352-361.                          |
|                                                                      | 20b     | <i>Model-based economic evaluation:</i> Describe the effects on the results of uncertainty for all input parameters, and uncertainty related to the structure of the model and assumptions.                                                                                                                                                           | Not applicable for cost of illness studies.     |
| Characterising heterogeneity                                         | 21      | If applicable, report differences in costs, outcomes, or cost-effectiveness that can be explained by variations between subgroups of patients with different baseline characteristics or other observed variability in effects that are not reducible by more information.                                                                            | Not applicable.                                 |
| <b>Discussion</b>                                                    |         |                                                                                                                                                                                                                                                                                                                                                       |                                                 |
| Study findings, limitations, generalisability, and current knowledge | 22      | Summarise key study findings and describe how they support the conclusions reached. Discuss limitations and the generalisability of the findings and how the findings fit with current knowledge.                                                                                                                                                     | Page 20, line 362-431.                          |
| <b>Other</b>                                                         |         |                                                                                                                                                                                                                                                                                                                                                       |                                                 |
| Source of funding                                                    | 23      | Describe how the study was funded and the role of the funder in the identification, design, conduct, and reporting of the analysis. Describe other non-monetary sources of support.                                                                                                                                                                   | Page 25, line 454.                              |
| Conflicts of interest                                                | 24      | Describe any potential for conflict of interest of study contributors in accordance with journal policy. In the absence of a journal policy, we recommend authors comply with International Committee of Medical Journal Editors recommendations.                                                                                                     | Page 24, line 452.                              |

## The economic impact of delirium in Australia in 2016-17: a cost of illness study

12 **2 Literature review strategy**

13 A targeted rather than systematic literature review was performed to identify relevant articles with  
14 the purpose of identifying the prevalence of delirium within hospital settings and in residential aged  
15 care facilities, the duration of delirium, and mortality due to delirium. The review also identified  
16 literature relevant to costs of delirium, including health system, productivity, and wellbeing impacts.  
17 Keywords were restricted to the title and abstract for searches conducted on PubMed.

- 18 1. ("delirium"[tiab] OR "cognitive impairment"[tiab] OR "acute confusion"[tiab]) AND Meta-  
19 Analysis[ptyp].
- 20 2. ("delirium"[tiab] OR "cognitive impairment"[tiab] OR "acute confusion"[tiab]) AND  
21 "Australia"[pl].
- 22 3. ("epidemiology"[MH] OR "mortality"[MH] OR "incidence"[MH] OR "prevalence"[MH] OR  
23 "duration"[tiab] OR "persistence"[tiab]) AND ("delirium"[tiab] OR "cognitive  
24 impairment"[tiab] OR "acute confusion"[tiab]).
- 25 4. 3 AND "Australia"[pl].
- 26 5. 3 AND "Australia"[pl] AND ("hospital"[tiab] OR "aged care"[tiab] OR "nursing home"[tiab]).
- 27 6. ("cost"[tiab] OR "economic"[tiab] OR "productivity"[tiab] OR "workforce"[tiab] OR "health  
28 use"[tiab] OR "utilization"[tiab]) AND ("delirium"[tiab] OR "cognitive impairment"[tiab] OR  
29 "acute confusion"[tiab]).
- 30 7. 5 and "Australia"[pl].
- 31 8. ("burden"[tiab] OR "disability"[tiab] OR "death"[tiab] OR "quality of life"[tiab]) AND  
32 ("delirium"[tiab] OR "cognitive impairment"[tiab] OR "acute confusion"[tiab]).
- 33 9. 7 AND "Australia"[pl].

## The economic impact of delirium in Australia in 2016-17: a cost of illness study

34 **3 Epidemiology**

35 A targeted rather than systematic literature review was performed to identify relevant articles with  
 36 the purpose of identifying the prevalence of delirium within hospital settings and in residential aged  
 37 care facilities, the duration of delirium, and mortality due to delirium.

38 **3.1 Prevalence in episodes of acute hospital care**

39 Results from the literature search were pooled to estimate an average prevalence that can be  
 40 applied to Australian hospital separations<sup>a</sup>. The studies, characteristics and pooled results are shown  
 41 in Table 1. Studies were pooled using weights based on the sample size.

42 **Table 1: Occurrence rates of delirium**

| Author, year                                      | Country     | Sample restrictions                     | Sample size | Mean age (SD) | Assessment frequency                                              | Occurrence/prevalence (%) |
|---------------------------------------------------|-------------|-----------------------------------------|-------------|---------------|-------------------------------------------------------------------|---------------------------|
| <b>Sources cited in Siddiqi et al<sup>4</sup></b> |             |                                         |             |               |                                                                   |                           |
| Braekhus 1994                                     | Norway      | > 75 years                              | 58          | 83.1          | Every 3 days                                                      | 24.1                      |
| Cameron 1987                                      | US          | No age restriction                      | 133         | 68.8          | On request                                                        | 15.0                      |
| Feldman 1999                                      | Israel      | >70 years, admissions to geriatric unit | 61          | 83.2 (6.8)    | Every 2 days for 14 days, intermittently until discharge or death | 18.0                      |
| Jitapunkul 1992                                   | UK          | Admissions to geriatric unit            | 184         | 81.7 (6.6)    | At admission, 1 week, discharge and case record review            | 21.7                      |
| Johnson 1990                                      | US          | >70 years                               | 235         | 78 (6.0)      | Within 24 hours and every day                                     | 20.4                      |
| O'Keefe 1996                                      | Ireland     | No age restriction                      | 225         | 82 (4.0)      | Within 24 hours and every 2 days                                  | 41.8                      |
| Rockwood 1989                                     | Canada      | Elderly                                 | 80          | 76.8          | Daily                                                             | 25.0                      |
| Rockwood 1993                                     | Canada      | Admissions to geriatric unit            | 168         | 79 (8.0)      | At admission, timing not clear                                    | 25.6                      |
| Seymour 1980                                      | Canada      | >70 years                               | 68          | 81.2          | Within 4 hours, weekly                                            | 16.2                      |
| Zanocchi 1998                                     | Italy       | Admissions to geriatric unit            | 585         | 77.1          | Twice-daily                                                       | 22.2                      |
| Total/weighted average                            |             |                                         | 1,797       | 80.3 (4.4)    |                                                                   | 24.0                      |
| <b>Recent point-prevalence/occurrence studies</b> |             |                                         |             |               |                                                                   |                           |
| McAvay, 2006 <sup>7</sup>                         | US          | >70 years                               | 433         | 79.8 (6.3)    | Daily                                                             | 12.7                      |
| Holden, 2008 <sup>8</sup>                         | New Zealand | >65 years                               | 216         | 79.3          | Every 2 days until discharge                                      | 29.1                      |

<sup>a</sup> Three studies from Siddiqi et al<sup>4</sup> were removed from the analysis. Two of the studies were restricted to a sample of patients who were admitted from community dwellings,<sup>5,6</sup> while one study was removed because there were insufficient details to assess the methods were appropriate as the full text article was not available in English.<sup>7</sup>

## The economic impact of delirium in Australia in 2016-17: a cost of illness study

| Author, year                | Country   | Sample restrictions                      | Sample size  | Mean age (SD)     | Assessment frequency                                 | Occurrence/prevalence (%) |
|-----------------------------|-----------|------------------------------------------|--------------|-------------------|------------------------------------------------------|---------------------------|
| McCusker, 2003 <sup>9</sup> | Canada    | >65 years                                | 1,552        | 83.6 (7.4)        | -                                                    | 22.3                      |
| Inouye, 1998 <sup>10</sup>  | US        | >65 years, medical and surgical patients | 107          | -                 | Admission and discharge                              | 25.0                      |
| Jones, 2006 <sup>11</sup>   | US        | >70 years                                | 491          | 79.0 (6.0)        | Daily                                                | 22.0                      |
| Inouye, 1998 <sup>10</sup>  | US        | >65 years, medical and surgical patients | 174          | -                 | Admission and discharge                              | 15.0                      |
| Ryan 2013 <sup>12</sup>     | Ireland   | Adults, no restriction                   | 280          |                   | Point prevalence                                     | 17.6                      |
| Bellelli 2016 <sup>3</sup>  | Italy     | >65 years                                | 1,867        | 82 (7.4)          | Point prevalence                                     | 22.9                      |
| Meagher 2014 <sup>13</sup>  | Ireland   | Adults, no restriction                   | 311          | 76 (13.1)         | Point prevalence                                     | 16.7                      |
| Iseli 2007 <sup>14</sup>    | Australia | >65 years                                | 104          | 80.1 (7.0)        | At admission, follow up at 2-3 days, and then weekly | 21.0                      |
| Travers 2013 <sup>15</sup>  | Australia | >70 years                                | 493          | 80.4 (6.5)        | Daily                                                | 17.3                      |
| Speed 2007 <sup>16</sup>    | Australia | Adults, no restriction                   | 1,209        | 80.0              | Four point prevalence audits                         | 10.9                      |
| Total/weighted average      |           |                                          | 7,237        | 81.1 (7.4)        |                                                      | 19.2                      |
| <b>Overall</b>              |           |                                          | <b>9,034</b> | <b>80.9 (6.6)</b> |                                                      | <b>20.2</b>               |

43 Source: Based on Siddiqi et al<sup>4</sup> and sources as itemised in the table. Weighted averages are based on sample size.

### 44 3.2 Duration of delirium episodes

45 As delirium is a transient condition, it is important to estimate the average duration of an episode of  
 46 delirium to calculate the burden imposed on society (Table 2).

47 Table 2: Duration of delirium

| Author, year                         | Country     | Sample restrictions                                                                                              | Sample size  | Age (SD)   | Duration (days) |
|--------------------------------------|-------------|------------------------------------------------------------------------------------------------------------------|--------------|------------|-----------------|
| Adamis, 2006 <sup>24</sup>           | England     | Elderly care unit; ≥70 years                                                                                     | 94           | 82.8 (6.5) | 8.6             |
| Andrew, 2005 <sup>25</sup>           | Canada      | Admissions to geriatric unit                                                                                     | 77           | 78.5 (7.2) | 6.3             |
| O'Keeffe, 1997 <sup>26</sup>         | Ireland     | Admissions to geriatric unit                                                                                     | 94           | 83.2 (6.8) | 7.0             |
| Pandharipande, 2013 <sup>27</sup>    | US          | Admissions to intensive care unit (ICU) with defined list of conditions; excluded those with recent ICU exposure | 606          | 61         | 4.0             |
| Rockwood, 1993 <sup>28</sup>         | Canada      | Admissions to geriatric unit, mostly admitted from community                                                     | 173          | 79 (8)     | 8.0             |
| Van den Boogaard, 2012 <sup>29</sup> | Netherlands | Admissions to ICU; excluded those admitted for < 1 day                                                           | 272          | 81.7 (6.6) | 2.0             |
| Cole, 2012 <sup>30</sup>             | Canada      | Long-term care residents                                                                                         | 279          | 87.4       | 11.3            |
| <b>Total/weighted average</b>        |             |                                                                                                                  | <b>1,595</b> |            | <b>5.9</b>      |

48 Source: sources as itemised in the table. The weighted averages were based on sample size.

## The economic impact of delirium in Australia in 2016-17: a cost of illness study

49 **3.3 Mortality associated with delirium**

50 Delirium is associated with higher rates of mortality in hospital settings, and a greater chance of  
 51 mortality occurring in the year following an episode of delirium. Mortality was estimated using an  
 52 attributable fraction approach based on literature. Witlox et al<sup>31</sup> reported an overall average  
 53 mortality rate of 38.0% compared to a rate of 27.5% with no delirium, which was a 1.4-fold increase  
 54 for those with delirium. The hazard ratio – indicating how much more likely someone with delirium  
 55 is to have died at any point in time – was estimated to be 1.95. The authors included seven studies  
 56 from the US, UK, Canada, Chile and Brazil. To estimate mortality associated with delirium for  
 57 Australia, the Chilean and Brazilian studies have been excluded from the analysis as they are  
 58 demographically less similar to Australia and there may be alternative drivers of mortality in those  
 59 countries. The hazard ratio was re-estimated by meta-analysis using a random effects model. The  
 60 final reweighted hazard ratio was estimated to be 1.77 (Table 3).

61 **Table 3: Mortality rates and hazard ratio for mortality**

| Author, year (as cited in Witlox et al <sup>31</sup> ) | Country | Subgroup         | Hazard ratio for mortality (95% confidence interval) |
|--------------------------------------------------------|---------|------------------|------------------------------------------------------|
| Gonzalez et al 2009                                    | Chile   | General medical  | 4.04 (2.19 – 7.46)                                   |
| Furlaneto and Garcez-Leme 2007                         | Brazil  | Femoral fracture | 1.28 (0.66 – 2.48)                                   |
| Leslie et al 2005                                      | US      | General medical  | 1.62 (1.13 – 2.33)                                   |
| McCusker et al, 2002                                   | Canada  | General medical  | 2.16 (1.06 – 4.41)                                   |
| Nightingale et al, 2001                                | UK      | Hip fracture     | 2.40 (1.66 – 3.48)                                   |
| Rockwood et al, 1999                                   | Canada  | General medical  | 1.80 (1.11 – 2.92)                                   |
| Francis and Kapoor, 1992                               | US      | General medical  | 1.40 (0.79 – 2.48)                                   |
| <b>Pooled estimate</b>                                 |         |                  | <b>1.95 (1.51 – 2.52)</b>                            |
| <b>Reweighted estimate</b>                             |         |                  | <b>1.77 (1.39 – 2.15)</b>                            |

62 Source: Based on Witlox et al<sup>31</sup>

63 The hazard ratio (1.77) based on data from Witlox et al<sup>31</sup> was applied to general population mortality  
 64 rates, including the 1.4-fold increase for mortality for people who had delirium, for the respective  
 65 age groups to estimate the number of deaths associated with delirium in 2016-17. It was expected  
 66 that 12,571 people who had delirium would die in 2016-17, noting not all mortality is due to delirium  
 67 itself (e.g. comorbid dementia or other illness may contribute to both delirium and death). Deaths

The economic impact of delirium in Australia in 2016-17: a cost of illness study

- 68 due to delirium were estimated by applying the population attributable fraction to total deaths in  
69 the delirium cohort in 2016-17.<sup>b</sup>

---

<sup>b</sup> The formula to estimate the number of deaths attributable to delirium is as follows:

*Population attributable fraction* =  $\frac{P.(HR-1)}{P.(HR-1)+1}$ , where P equals the prevalence rate for each age group, and HR equals the hazard ratio. The population attributable fraction is then multiplied by the total number of deaths that occur in people with delirium.



## The economic impact of delirium in Australia in 2016-17: a cost of illness study

70 **4 Hospital expenditure**

71 Hospital expenditure data in Australia includes general public and private hospital admissions. The  
72 literature shows that delirium results in functional decline, resulting in a longer length of stay (LOS)  
73 for hospital patients, consequently leading to higher hospitalisation expenditure.

74 To establish the incremental change in LOS for hospital patients with delirium, a targeted review of  
75 the relevant literature was conducted for studies that are demographically similar to Australia and  
76 that assessed outcomes for patients admitted to general medical wards.

77 The results of these studies were weighted by sample size to estimate the additional LOS for people  
78 with delirium. On average, the LOS for people with delirium was estimated to be 24.2 days rather  
79 than 16.7 days in the control groups, a difference of 7.5 days (Table 4). Additional studies were used  
80 to estimate the proportion of additional days that are due to delirium after controlling for  
81 confounding factors. When additional factors are controlled for, including the baseline  
82 characteristics of patients, delirium accounts for 36% of the additional days, as shown in Table 5. As  
83 such, we estimate that delirium increases the average LOS by 2.7 days.

## The economic impact of delirium in Australia in 2016-17: a cost of illness study

## 84 Table 4: Additional LOS associated with delirium

| Author, year                    | Country     | Sample characteristics                        | Sample size  | Difference in LOS |
|---------------------------------|-------------|-----------------------------------------------|--------------|-------------------|
| Alexander, 2016 <sup>32</sup>   | UK          | Admissions to general hospital                | 590          | 6.0               |
| Emond, 2017 <sup>33</sup>       | Canada      | Admissions to ICU; ≥ 65 years                 | 200          | 8.6               |
| Gaudet, 1993 <sup>34</sup>      | France      | Admissions to geriatric unit                  | 487          | 18.0              |
| Jitapunkul, 1992 <sup>35</sup>  | UK          | Admissions to acute geriatric ward; ≥60 years | 184          | 4.0               |
| Kolbeinson, 1993 <sup>36</sup>  | Iceland     | Admissions to emergency ward; ≥70 years       | 272          | 2.9               |
| McCusker, 2003 <sup>37</sup>    | Canada      | Acute care; ≥65 years                         | 359          | 3.6               |
| O'Keeffe, 1997 <sup>26</sup>    | Ireland     | Admissions to geriatric unit                  | 225          | 10.0              |
| Ramsay, 1991 <sup>38</sup>      | UK          | Admissions to acute geriatric ward            | 119          | -1.9              |
| Rockwood, 1993 <sup>28</sup>    | Canada      | Admissions to geriatric unit                  | 173          | 4.0               |
| Stevens, 1998 <sup>39</sup>     | Australia   | Admissions to general medical                 | 84           | 12                |
| Tan, 2015 <sup>40</sup>         | New Zealand | >65 years                                     | 250          | 3.8               |
| Thomas, 1988 <sup>41</sup>      | US          | Admissions to general medical ward            | 133          | 11.0              |
| <b>Total / weighted average</b> |             |                                               | <b>3,076</b> | <b>7.5</b>        |

85 Source: as itemised in table.

## 86 Table 5: Adjusted and unadjusted difference in LOS due to delirium

| Author, year                    | Country | Sample characteristics        | Sample size  | Unadjusted difference | Adjusted difference | Relativity  |
|---------------------------------|---------|-------------------------------|--------------|-----------------------|---------------------|-------------|
| Emond, 2017 <sup>33</sup>       | Canada  | Admissions to ICU; ≥ 65 years | 200          | 8.6                   | 8.4                 | 0.98        |
| Inouye, 1998 <sup>10</sup>      | US      | ≥65 years                     | 727          | 1.2                   | 0.5                 | 0.42        |
| McCusker, 2003 <sup>37</sup>    | Canada  | Acute care; ≥65 years         | 359          | 4.5                   | 0.5                 | 0.10        |
| O'Keeffe, 1997 <sup>26</sup>    | Ireland | Admissions to geriatric unit  | 225          | 10.0                  | 0.7                 | 0.07        |
| <b>Total / weighted average</b> |         |                               | <b>1,511</b> | <b>4.3</b>            | <b>1.5</b>          | <b>0.36</b> |

87 Source: as itemised in table.

## The economic impact of delirium in Australia in 2016-17: a cost of illness study

88 **5 Informal care costs**

89 Carers are people who provide care to others in need of assistance or support. An informal carer  
90 provides this service without formal payment and does so outside of the formal care sector. An  
91 informal carer will typically be a family member or friend of the person receiving care, and usually  
92 lives in the same household as the recipient of care.

93 Bellelli et al<sup>55</sup> found that 26.2% of patients who developed delirium during their hospital stay  
94 required assistance from paid caregivers following discharge. The rate of paid caregiving was  
95 assumed to be comparable to informal care in Australia as the care is usually provided by family  
96 members. In order to estimate the number of care recipients for Australia, 26.2% was applied to the  
97 prevalence of delirium for people who are 65 years or older and who live in the community (total  
98 adjusted prevalence – prevalence in aged care). Therefore, it was estimated that 20,741 people  
99 would require care due to delirium in Australia in 2016-17. People with delirium required assistance  
100 with an additional 0.36 activities of daily living over a period of 12 months.<sup>56,57</sup>

101 Analysis of the Survey of Disability, Ageing and Carers,<sup>58</sup> revealed an almost linear trend, such that  
102 an additional 2.57 hours of care were provided per week for each additional activity on average.<sup>c</sup> As  
103 such, each person would receive 0.9 additional hours of care per week or 47.6 hours of care  
104 throughout the year.

105 The carer's opportunity cost of time was calculated based on the weighted average weekly  
106 earnings<sup>54</sup> and the chance of being employed.<sup>53</sup>

---

<sup>c</sup> Care needs would likely depend on the type of activity for which help is required; however there was insufficient evidence to determine which activities are most influenced by delirium.

## The economic impact of delirium in Australia in 2016-17: a cost of illness study

**6 References**

1. Bellelli G, Morandi A, Di Santo SG, et al. "Delirium Day": a nationwide point prevalence study of delirium in older hospitalized patients using an easy standardized diagnostic tool. *BMC Med.* 2016; 14(1): 106-117.
2. Siddiqi N, House AO, Holmes JD. Occurrence and outcome of delirium in medical in-patients: a systematic literature review. *Age and ageing.* 2006; 35(4): 350-364.
3. Bourdel-Marchasson I, Vincent S, Germain, C, et al. Delirium symptoms and low dietary intake in older inpatients are independent predictors of institutionalization: a 1-year prospective population-based study. *J Gerontol A Biol Sci Med Sci.* 2004; 59(4): M350-M354.
4. Francis J, Kapoor WN. Delirium in hospitalized elderly. *J Gen Intern Med.* 1990; 5(1): 65-79.
5. McAvay GJ, Van Ness PH, Bogardus ST, et al. Older adults discharged from the hospital with delirium: 1-year outcomes. *J Am Geriatr Soc.* 2006; 54(8): 1245-1250.
6. Holden J, Jayathissa S, Young G. Delirium among elderly general medical patients in a New Zealand hospital. *Intern Med.* 2008; 38(8): 629-634.
7. McCusker J, Cole MG, Voyer P, et al. Prevalence and incidence of delirium in long-term care. *Int J Geriatr Psychiatry.* 2011; 26(11): 1152-1161.
8. Inouye, SK, Rushing JT, Foreman MD, et al. Does delirium contribute to poor hospital outcomes? *J Gen Intern Med.* 1998; 13(4): 234-242.
9. Jones RN, Yang FM, Zhang Y, et al. Does educational attainment contribute to risk for delirium? A potential role for cognitive reserve. *J Gerontol A Biol Sci Med Sci.* 2006; 61(12): 1307-1311.
10. Ryan DJ, O'Regan NA, Caoimh RÓ, et al. Delirium in an adult acute hospital population: predictors, prevalence and detection. *BMJ Open.* 2013; 3(1): e001772, doi: 10.1136/bmjopen-2012-001772.
11. Meagher D, O'Regan N, Ryan D, et al. Frequency of delirium and subsyndromal delirium in an adult acute hospital population. *Br J Psychiatry.* 2014; 205(6): 478-485.
12. Iseli RK, Brand C, Telford M, et al. Delirium in elderly general medical inpatients: a prospective study. *Intern Med J.* 2007; 37(12): 806-811.
13. Travers C, Byrne G, Pachana N, et al. Prospective observational study of dementia and delirium in the acute hospital setting. *Intern Med J.* 2013; 43(3): 262-269.
14. Speed G, Wynaden D, McGowan S, et al. Prevalence rate of delirium at two hospitals in Western Australia. *Aust J Adv Nurs.* 2007; 25(1): 38-43.
15. Adamis D, Treloar A, Martin FC, et al. Recovery and outcome of delirium in elderly medical inpatients. *Arch Gerontol Geriatr.* 2006; 43: 289-298.

## The economic impact of delirium in Australia in 2016-17: a cost of illness study

16. Andrew, MK, Freter SH, Rockwood, K. Incomplete functional recovery after delirium in elderly people: a prospective cohort study. *BMC Geriatr.* 2005; 5(1): 5.
17. O'Keeffe S, Lavan J. The prognostic significance of delirium in older hospital patients. *J Am Geriatr Soc.* 1997; 45(2): 174-178.
18. Pandharipande PP, Girard TD, Jackson JC, et al. Long-term cognitive impairment after critical illness. *N Engl J Med.* 2013; 369(14): 1306-1316.
19. Rockwood K. The occurrence and duration of symptoms in elderly patients with delirium. *J Gerontol.* 1993; 48(4)L: M162-M166.
20. van den Boogaard M, Schoonhoven L, Evers AW, et al. Delirium in critically ill patients: impact on long-term health-related quality of life and cognitive functioning. *Crit Care Med.* 2012; 40(1): 112-118.
21. Cole MG, McCusker J, Voyer P, et al. The course of delirium in older long-term care residents. *Intern J Geriatric Psychiatry.* 2012; 27(12): 1291-1297.
22. Witlox J, Eurelings LS, de Jonghe JF, et al. Delirium in elderly patients and the risk of postdischarge mortality, institutionalization, and dementia: a meta-analysis. *Jama.* 2010; 304(4): 443-451.
23. Alexander K, Adamson J, Cunningham C, et al. The effect of delirium and dementia on length of stay (LOS) and functional recovery of patients in elderly medical wards. *Physiotherapy.* 2016; 102: e180-e181.
24. Émond M, Grenier D, Morin J, et al. Emergency department stay associated delirium in older patients. *Can Geriatr J.* 2017; 20(1): 10.
25. Gaudet MP, Pfitzenmeyer B, Tavernier-Vidal, et al. Les états confusionnels en milieu interniste gériatrique court séjour. *Psychol Méd.* 1993; 25(7): 611-614.
26. Jitapunkul S, Pillay I, Ebrahim S. Delirium in newly admitted elderly patients: a prospective study. *QJM: Intern J Med.* 1992; 83(1): 307-314.
27. Kolbeinsson H, Jonsson A. Delirium and dementia in acute medical admissions of elderly patients in Iceland. *Acta Psychiatr Scand.* 1993; 87(2): 123-127.
28. McCusker J, Cole, MG, Dendukuri N, et al. Does delirium increase hospital stay? *J Am Geriatr Soc.* 2003; 51(11): 1539-1546.
29. Ramsay R, Wright P, Katz A, et al. The detection of psychiatric morbidity and its effects on outcome in acute elderly medical admissions. *Intern J Geriatr Psychiatry.* 1991; 6(12): 861-866.
30. Stevens LE, de Moore GM, Simpson JM. Delirium in hospital: does it increase length of stay?. *Aust N Z J Psychiatry.* 1998 Dec;32(6):805-808.
31. Tan AH, Scott J. Association of point prevalence diagnosis of delirium on length of stay, 6-month mortality, and level of care on discharge at Waitemata District Health Board, Auckland. *N Z Med J.* 2015 Mar;128(1411):68-76.

## The economic impact of delirium in Australia in 2016-17: a cost of illness study

32. Thomas RI, Cameron DJ, Fahs MC. A prospective study of delirium and prolonged hospital stay: exploratory study. *Arch Gen Psychiatry*. 1988 Oct 1;45(10):937-940.
33. Australian Bureau of Statistics. Labour Force, Australia, Jun 2016, Cat. No. 6202.0 [Internet]. 2016 Jul 14 [cited 2017 Dec 11]. Available from: <http://www.abs.gov.au/AUSSTATS/abs@.nsf/DetailsPage/6202.0Jun%202016?OpenDocument>.
34. Australian Bureau of Statistics. Average Weekly Earnings, Australia, May 2017, Cat. No. 6302.0 [Internet]. 2017 Aug 17 [cited 2017 Dec 11]. Available from: <http://www.abs.gov.au/AUSSTATS/abs@.nsf/Lookup/6302.0Main+Features1May%202017?OpenDocument>.
35. Bellelli G, Bianchetti A, Trabucchi M. Delirium and costs of informal home care. *Arch Int Med*. 2008 Aug 11;168(15):1717.
36. Vida S, du Fort GG, Kakuma R, et al. An 18-month prospective cohort study of functional outcome of delirium in elderly patients: activities of daily living. *Int Psychogeriatr*. 2006 Dec;18(4):681-700.
37. Murray AM, Levkoff SE, Wetle TT, et al. Acute delirium and functional decline in the hospitalized elderly patient. *J Gerontol*. 1993 Sep 1;48(5):M181-M186.
38. Australian Bureau of Statistics. Microdata: Disability, Ageing and Carers, Australia, 2015, Cat. No. 4430.0.30.002 [Internet]. 2016 Oct 18 [cited 2017 Dec 11]. Available from: <http://www.abs.gov.au/AUSSTATS/abs@.nsf/Lookup/4430.0.30.002Main+Features12015>.
